# Supplementary material for: Individualized discovery of rare cancer drivers in global network context
Source: eLife journal article supplement (doi:10.7554/elife.74010), 2022-05-20

MB(union)

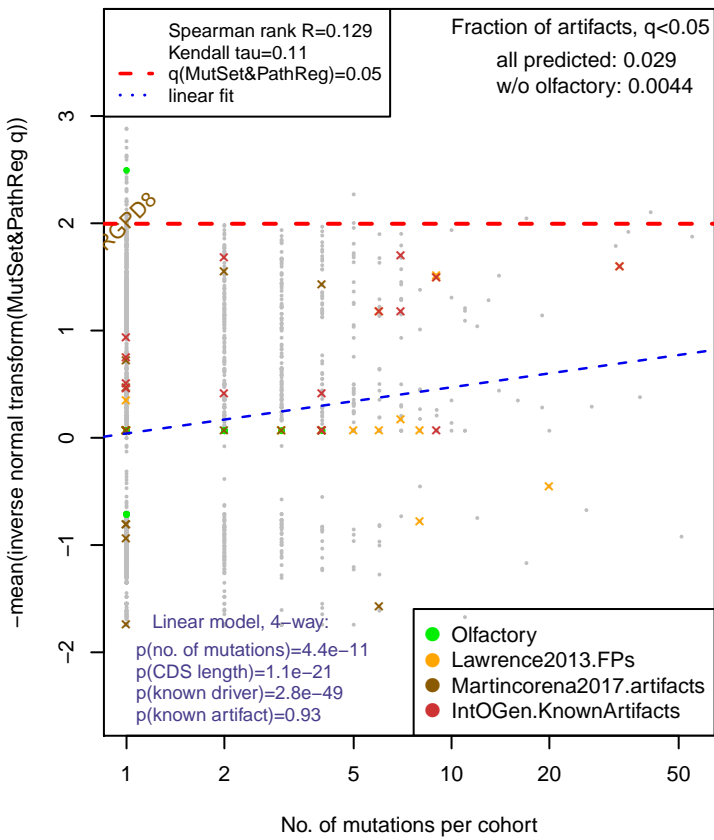

TCGA:SKCM

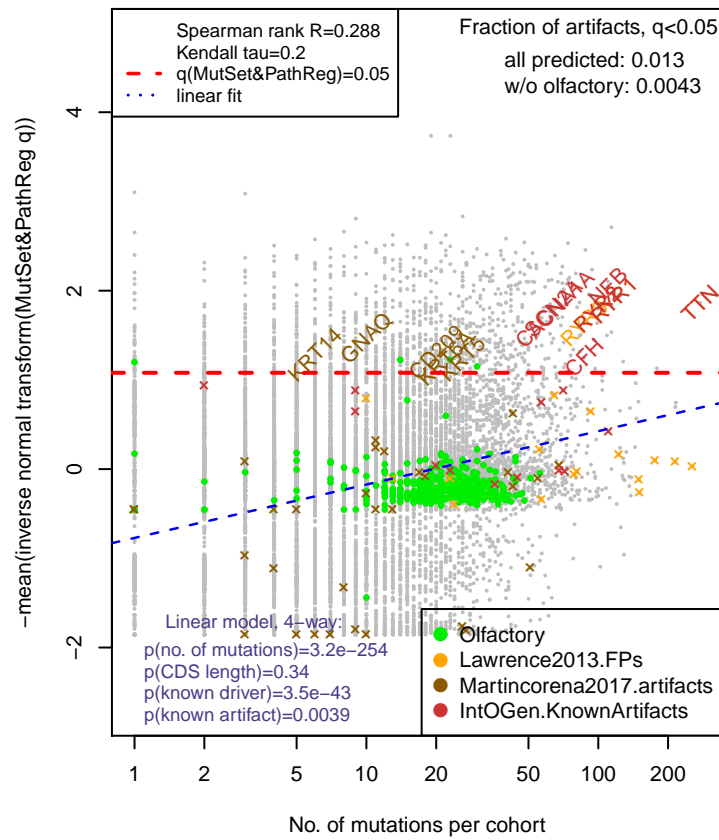

TCGA:PRAD

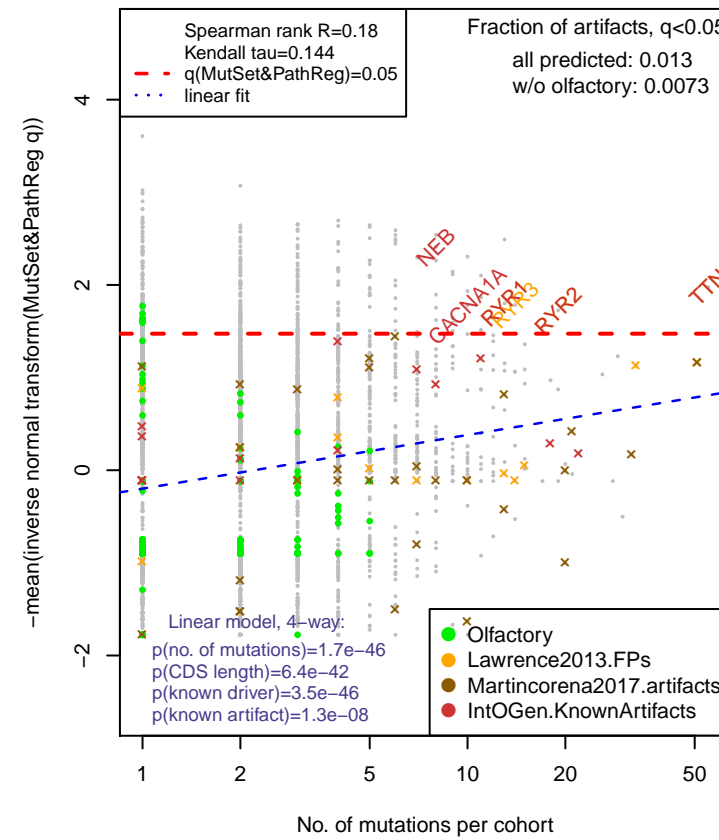

TCGA:PAAD

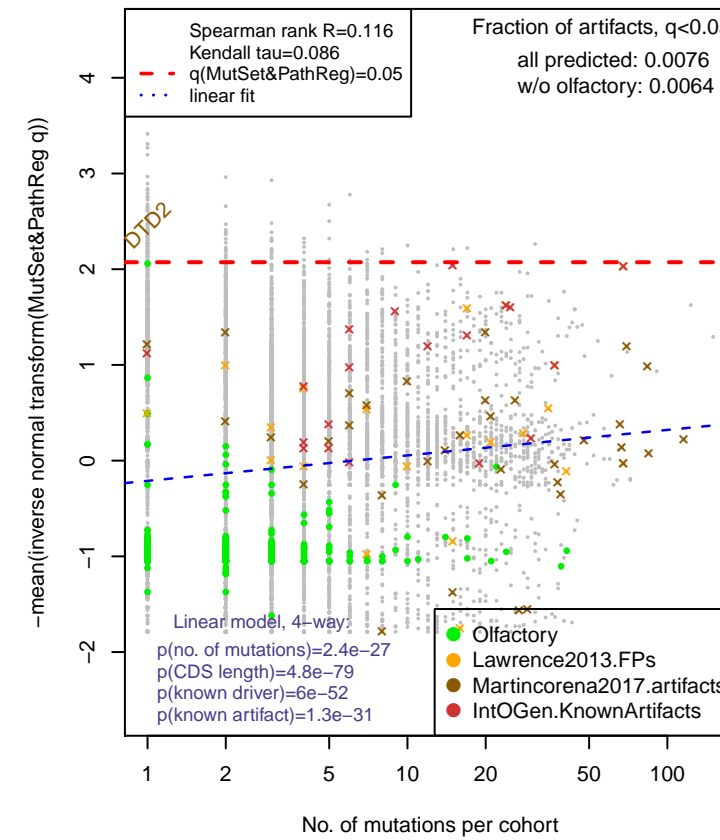

TCGA:OV

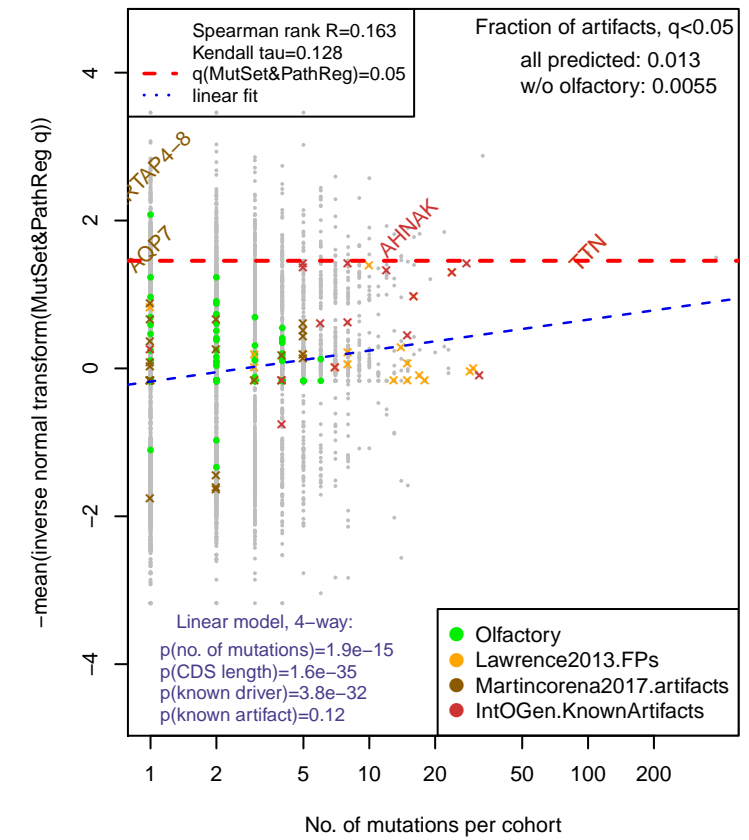

TCGA:LUSC

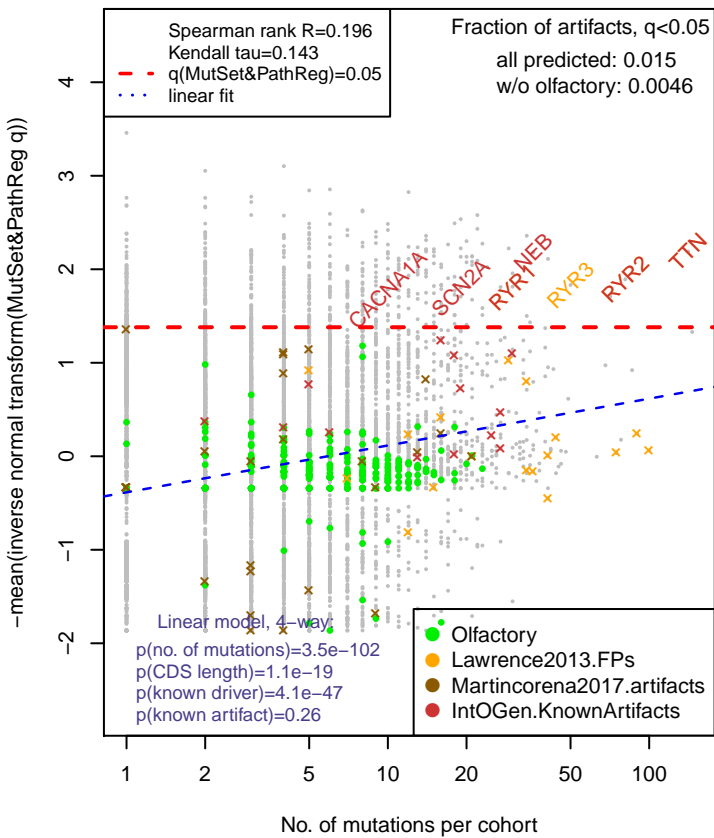

TCGA:LUAD

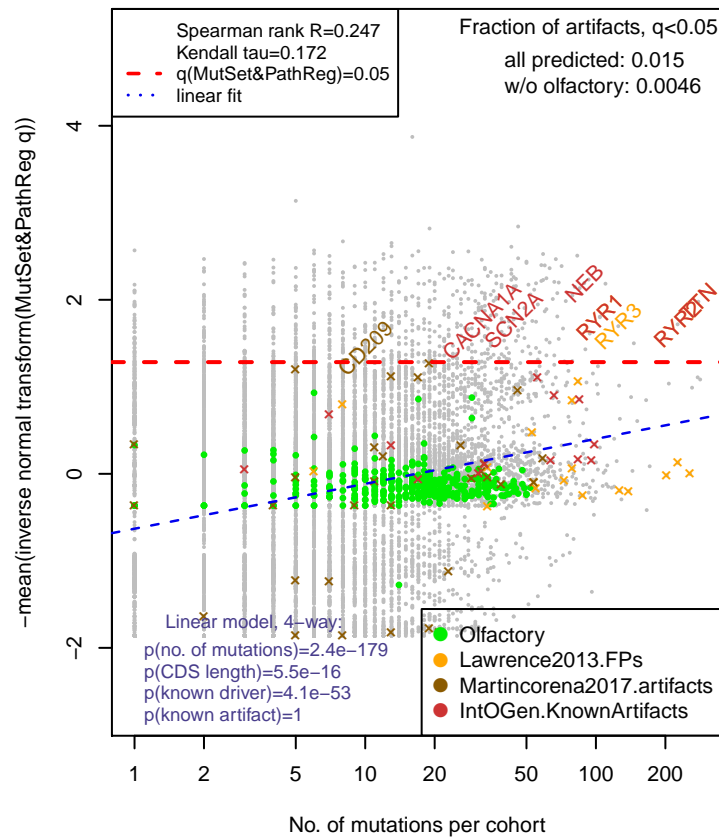

TCGA:GBM

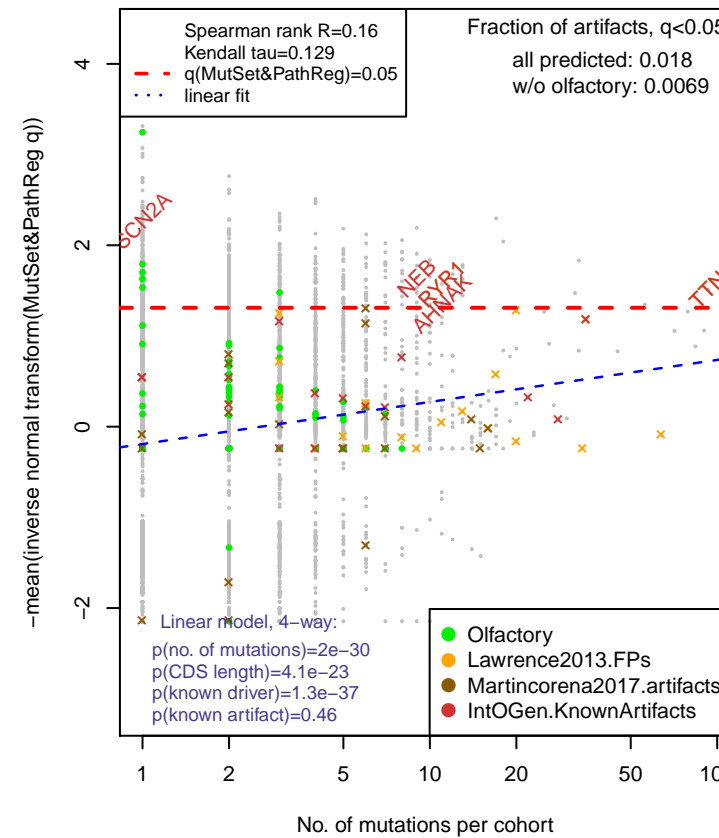

TCGA:COAD

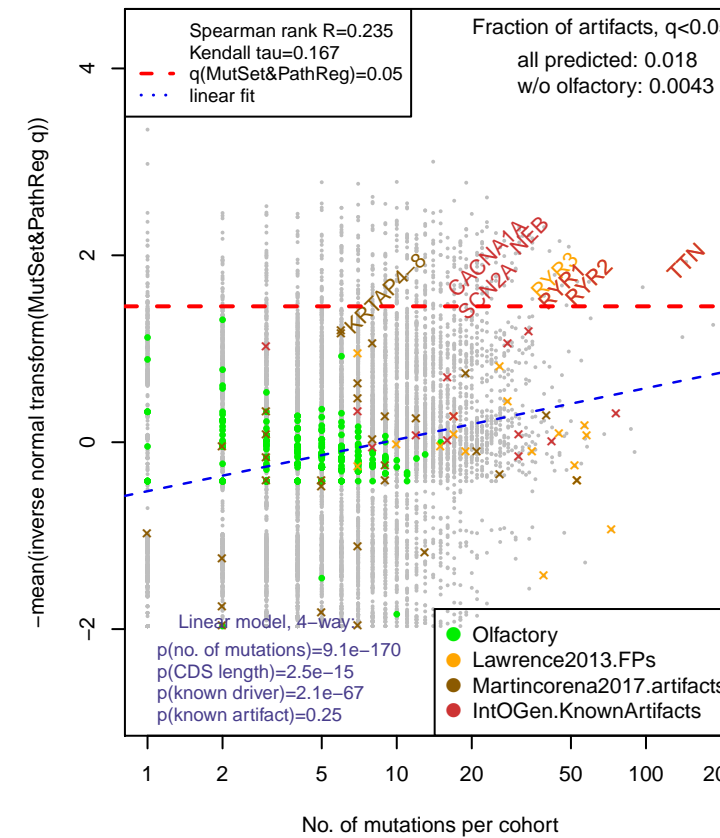

TCGA:BRCA

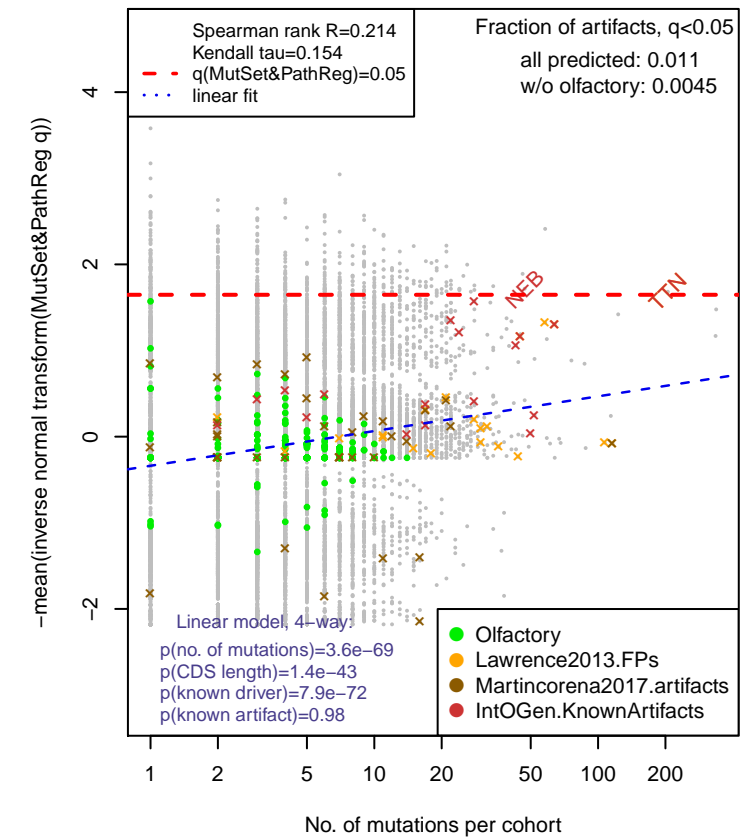

MB(union)

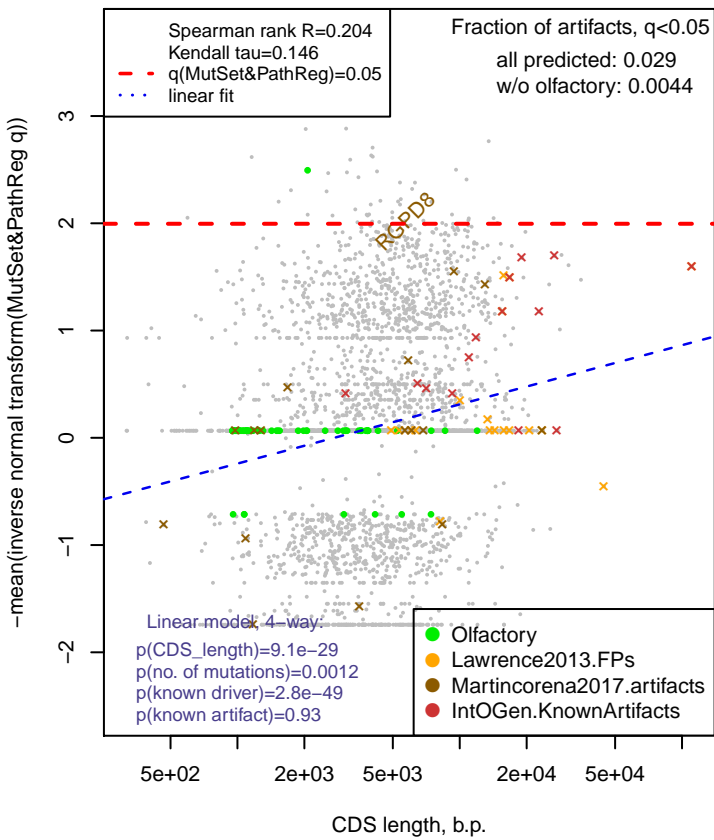

TCGA:SKCM

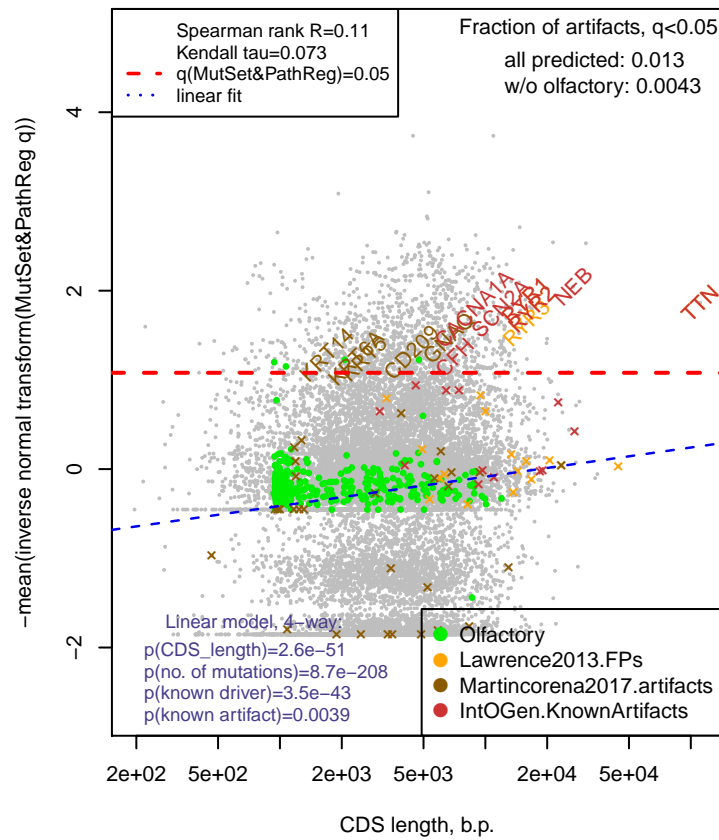

TCGA:PRAD

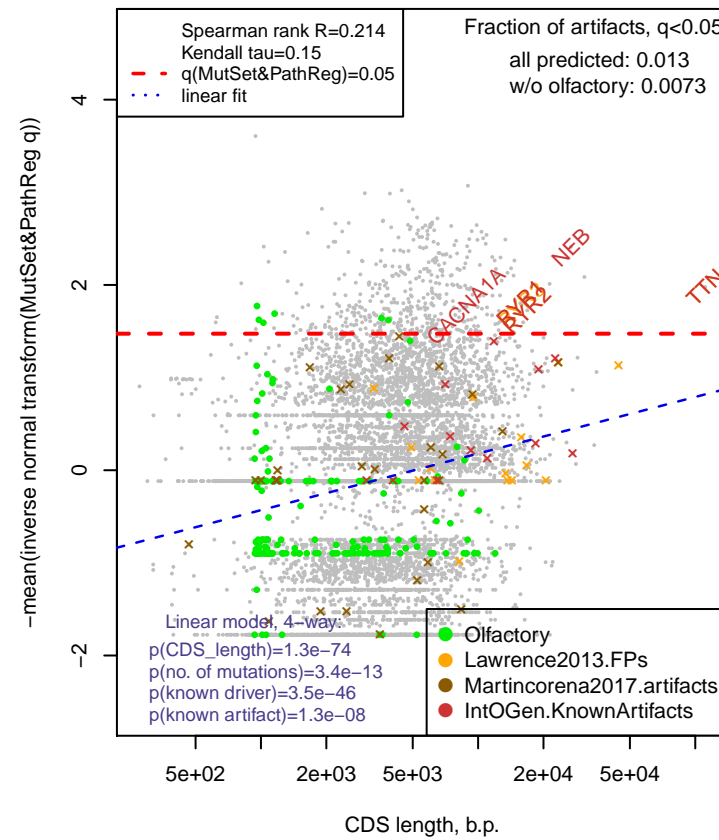

TCGA:PAAD

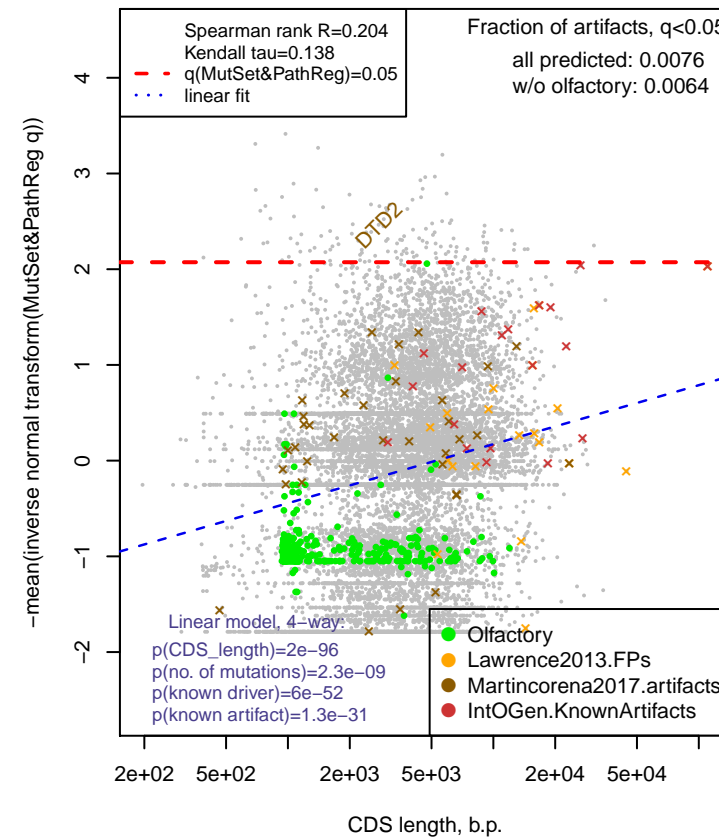

TCGA:OV

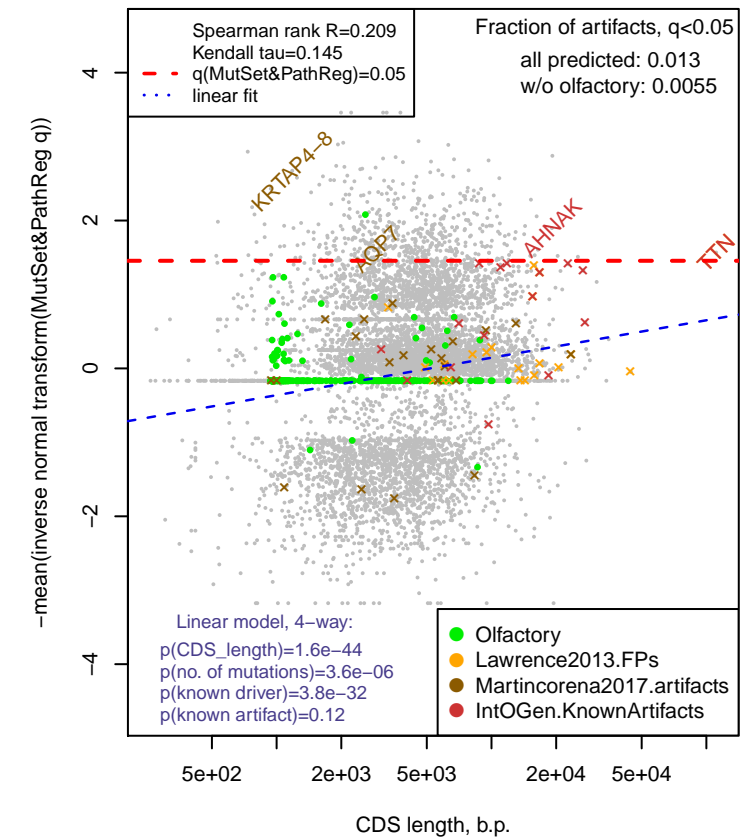

TCGA:LUSC

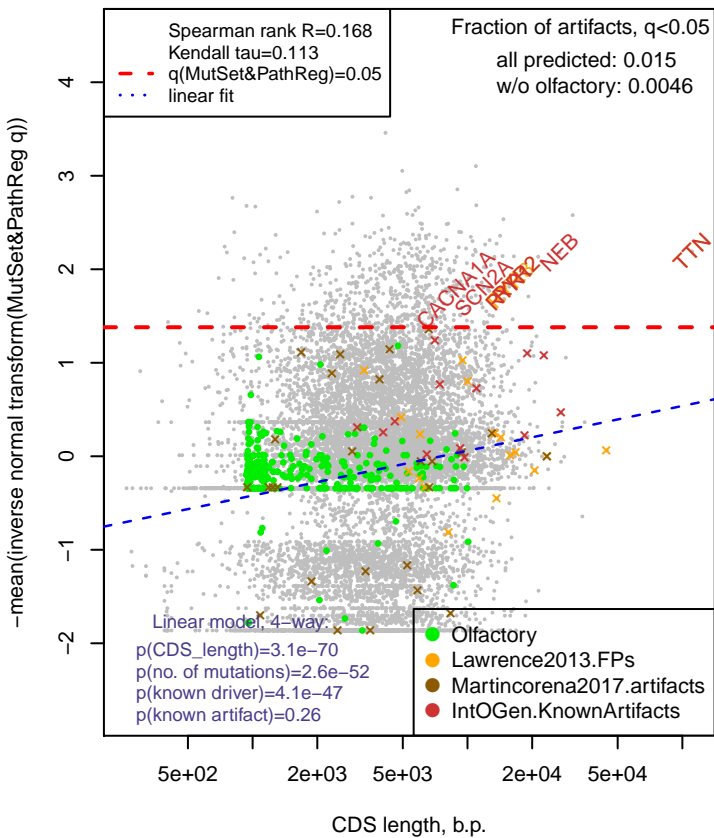

TCGA:LUAD

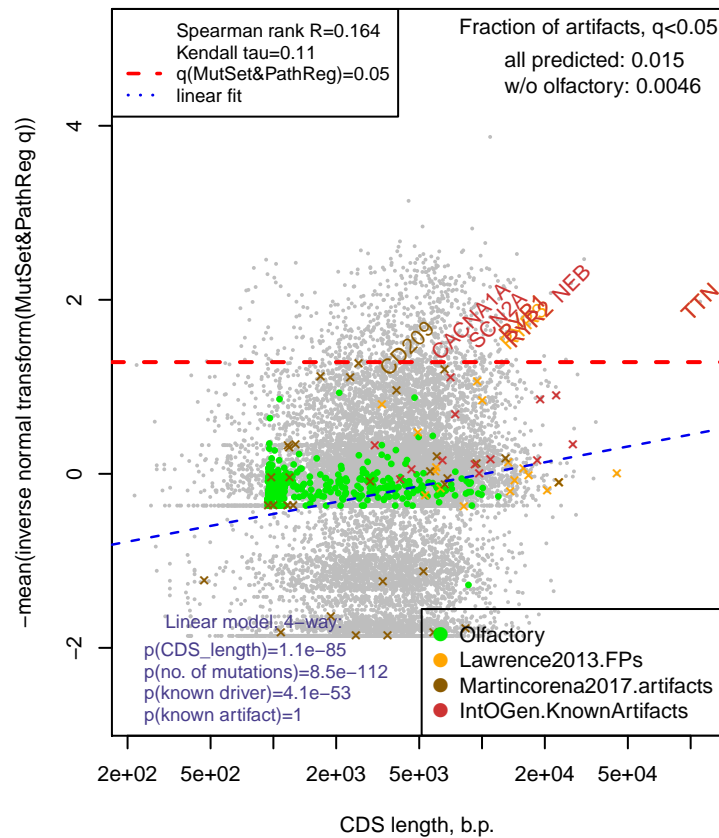

TCGA:GBM

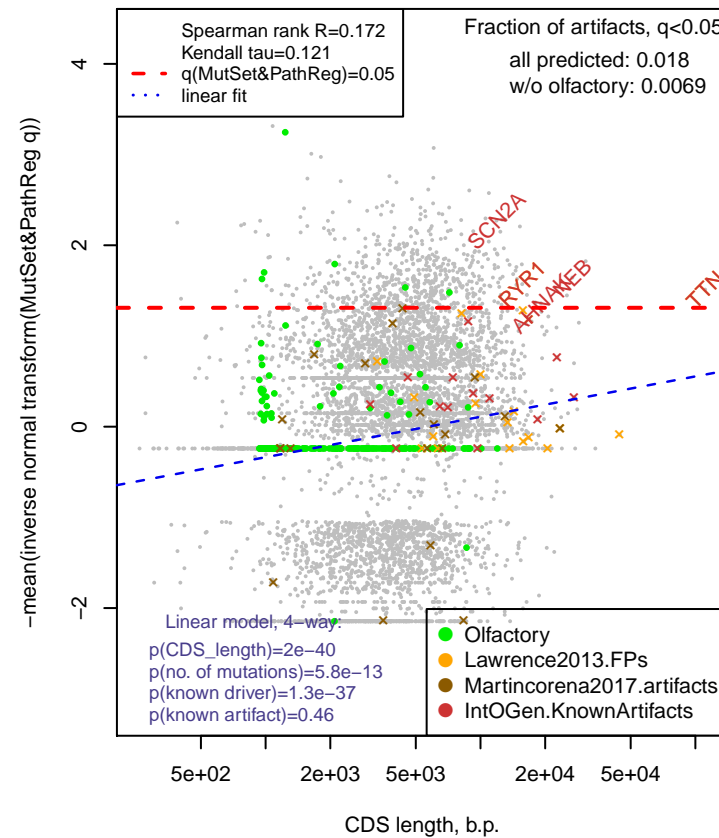

TCGA:COAD

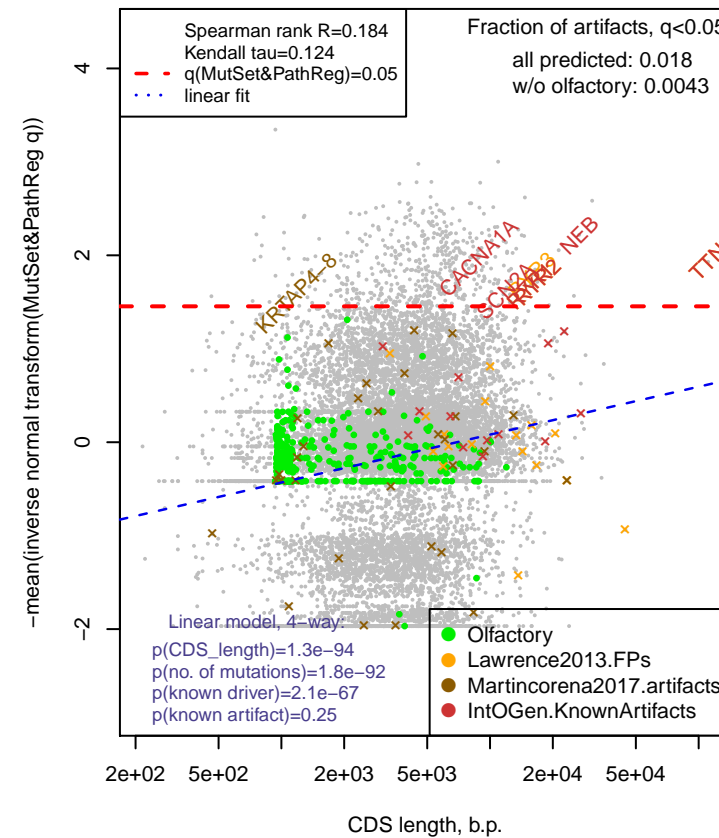

TCGA:BRCA

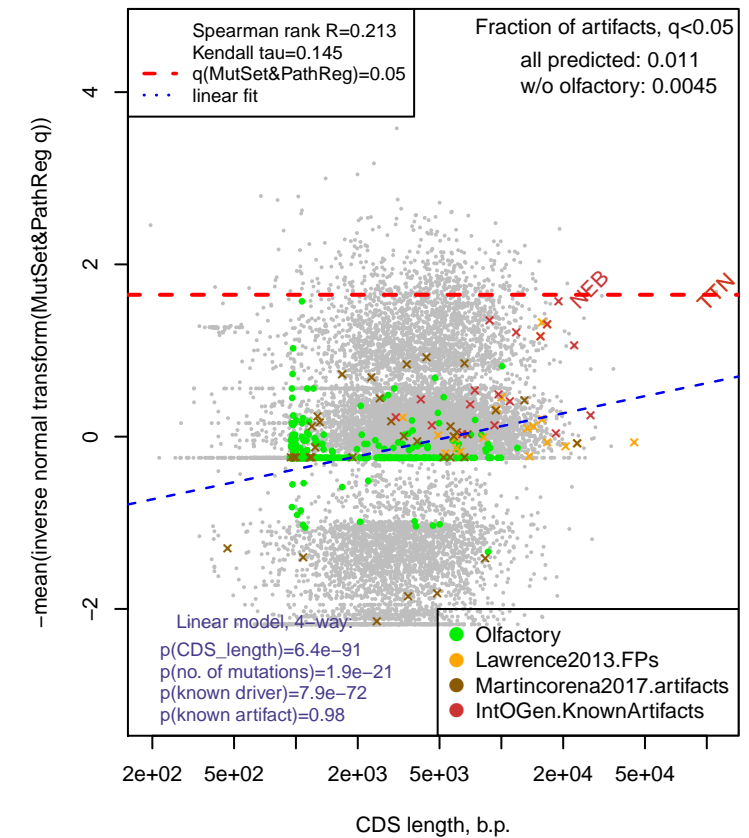



MB(union)

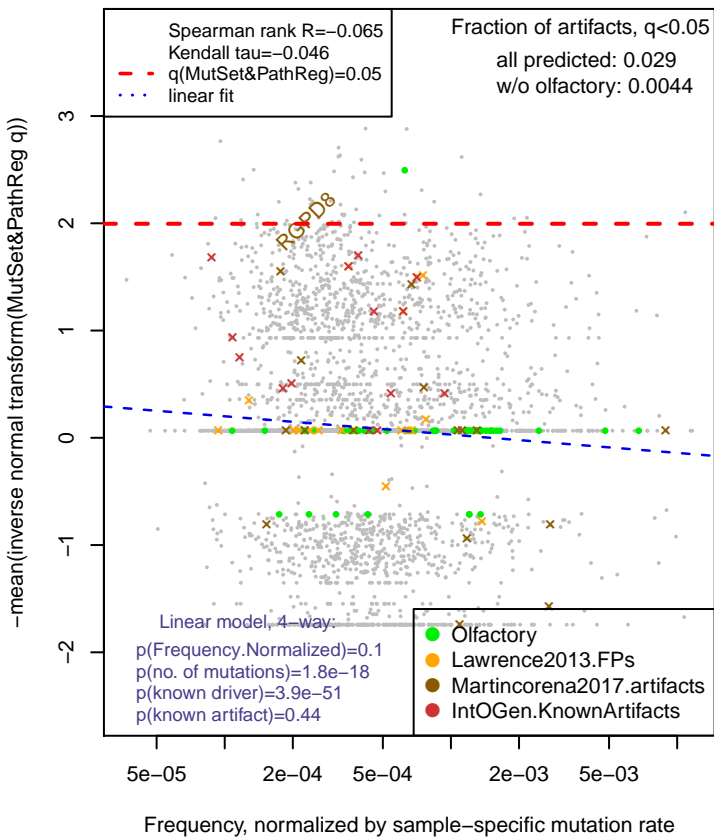

TCGA:SKCM

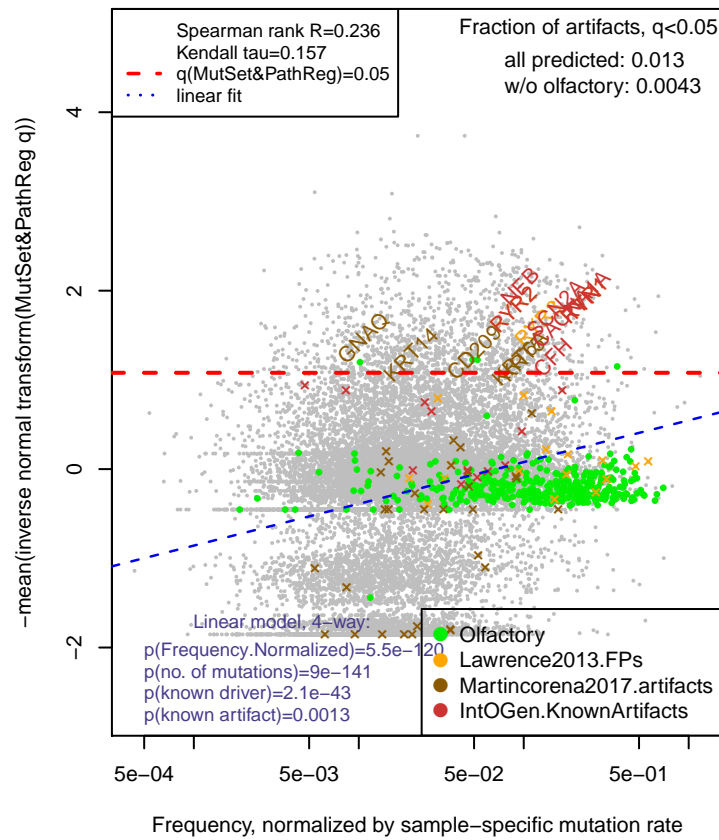

TCGA:PRAD

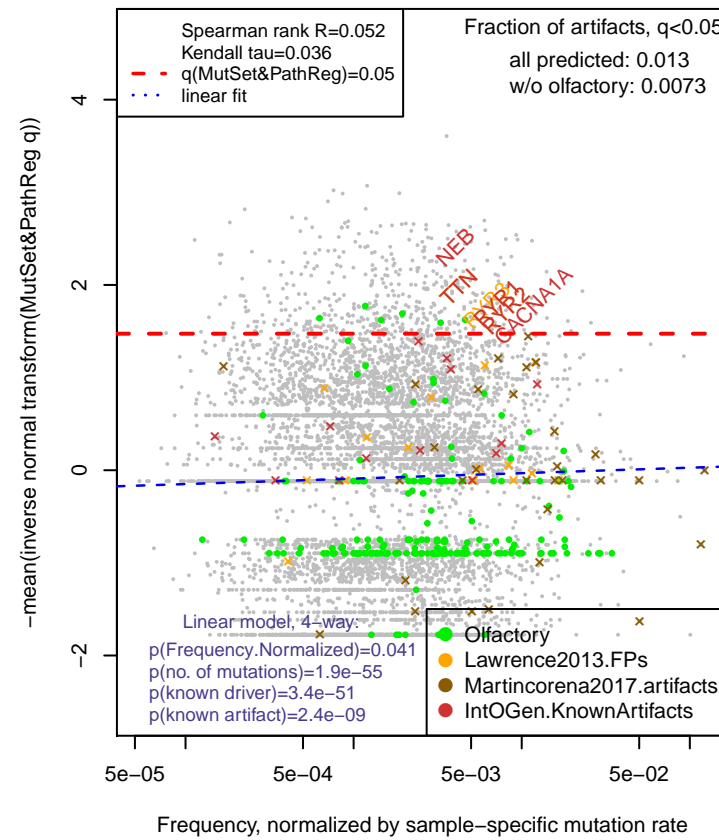

TCGA:PAAD

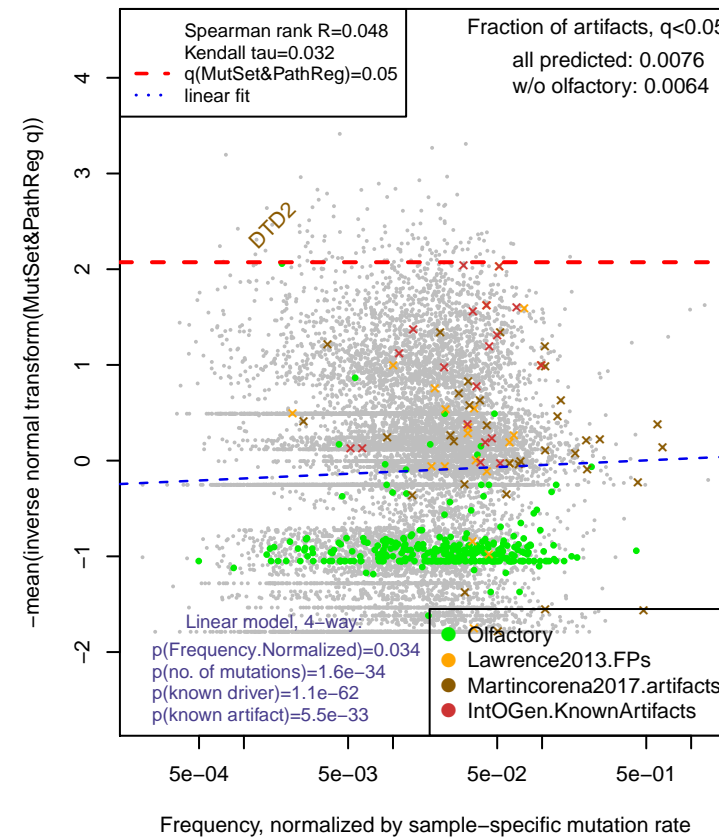

TCGA:OV

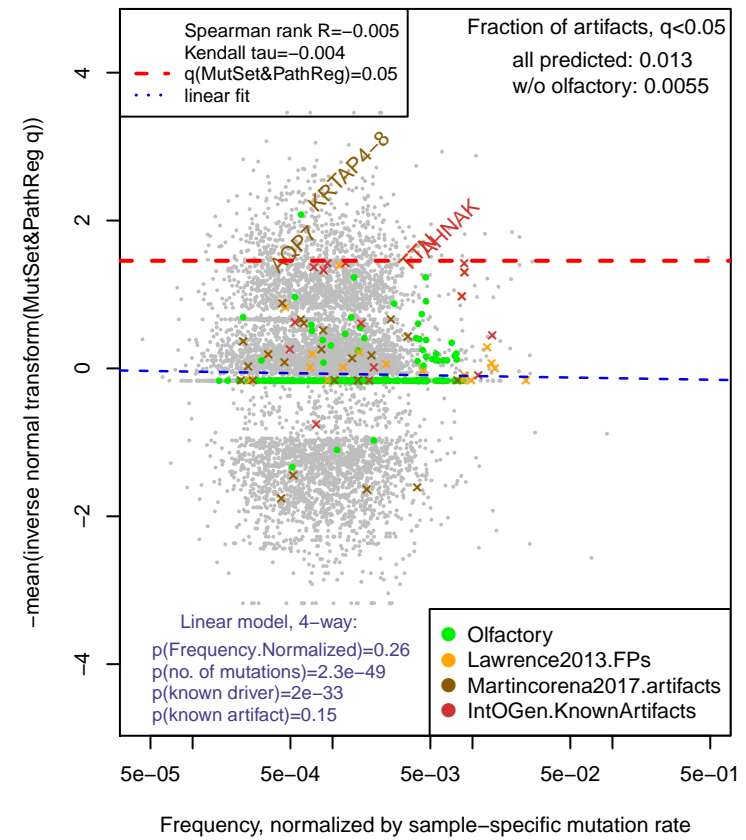

TCGA:LUSC

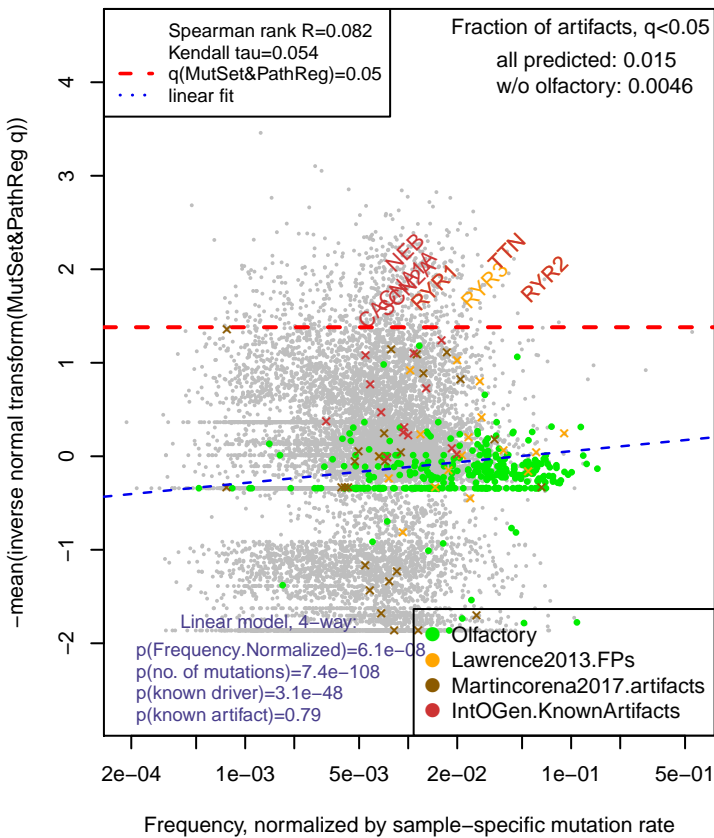

TCGA:LUAD

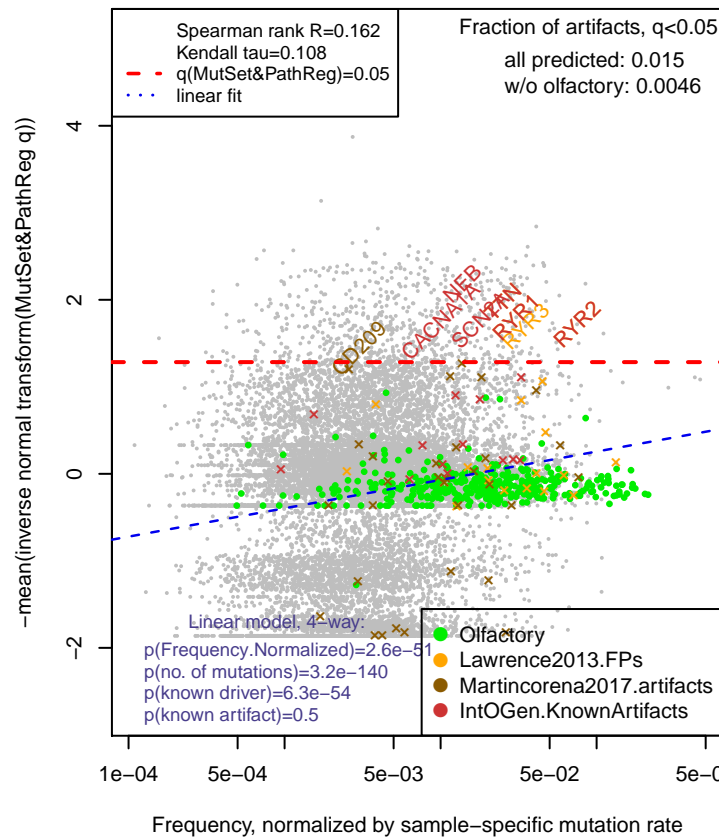

TCGA:GBM

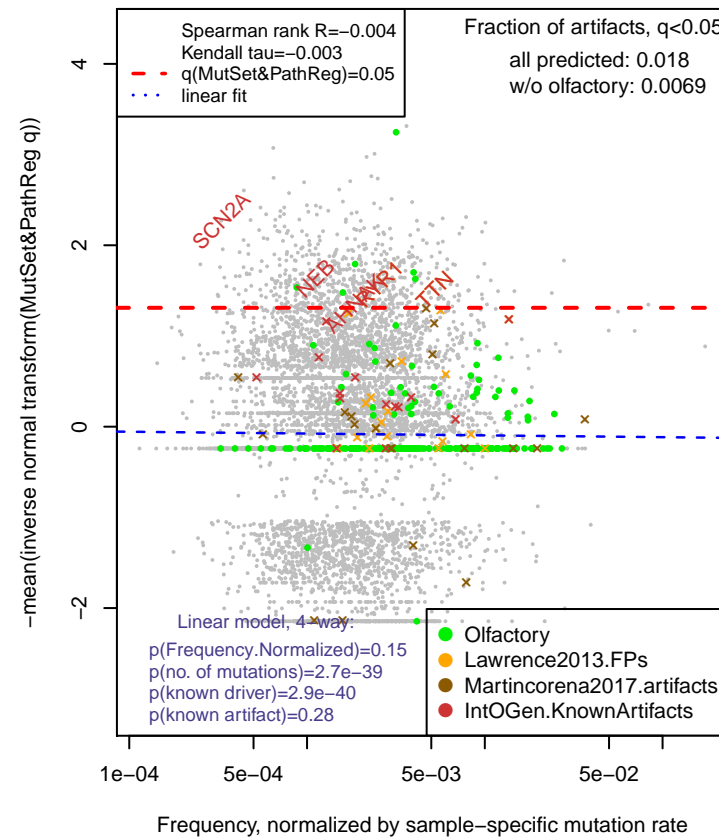

TCGA:COAD

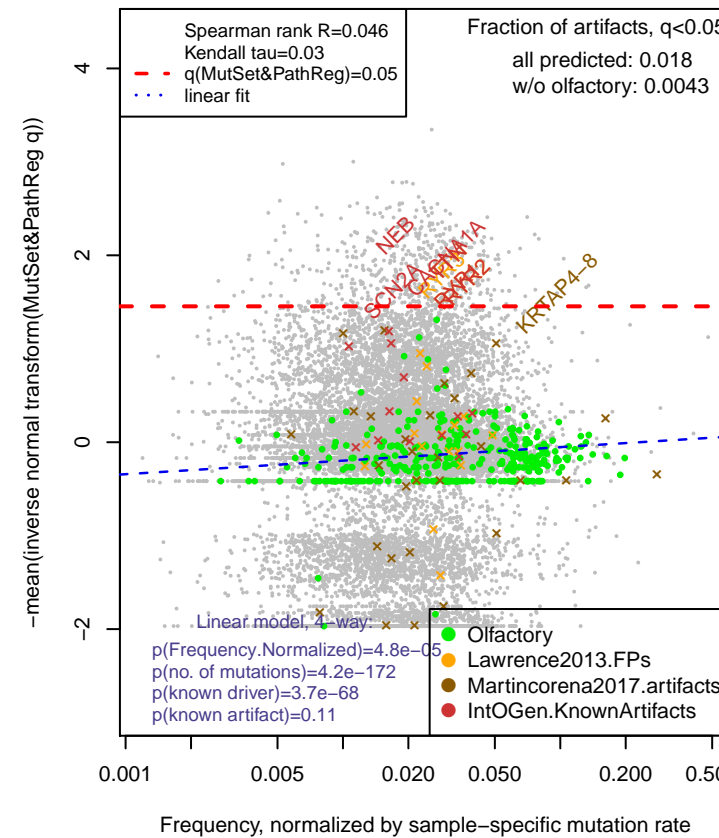

TCGA:BRCA

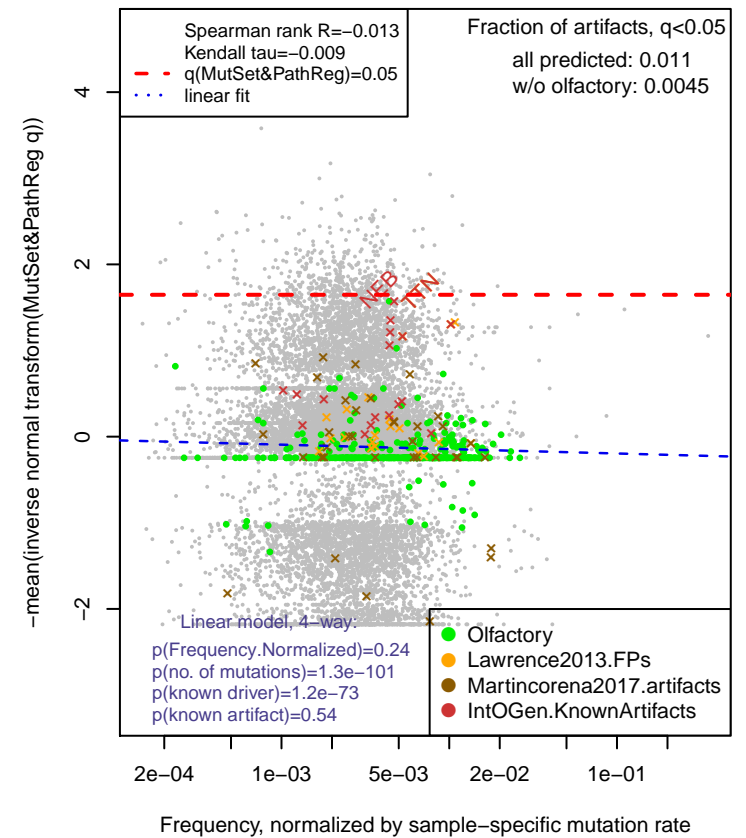

MB(union)

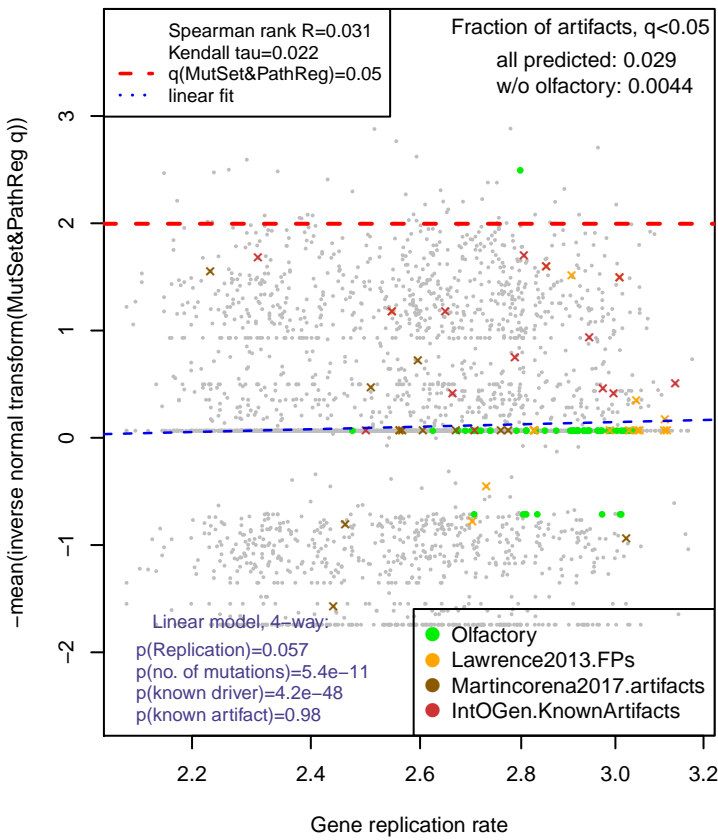

TCGA:SKCM

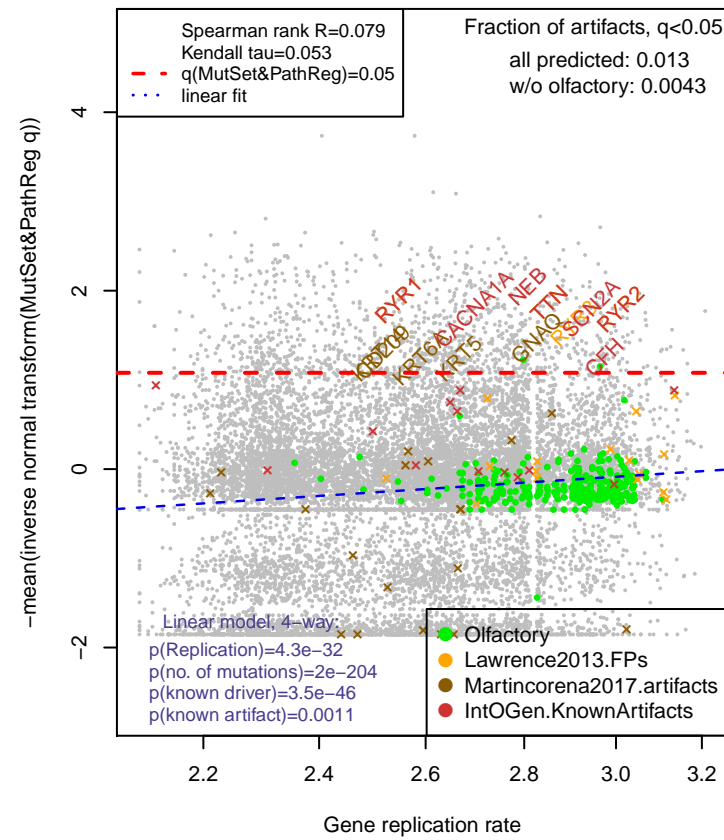

TCGA:PRAD

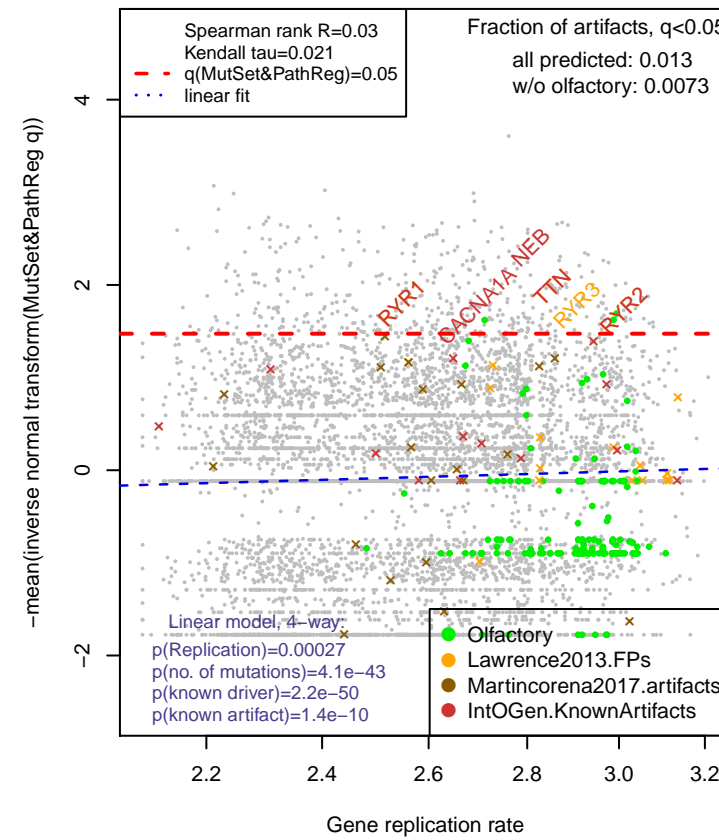

TCGA:PAAD

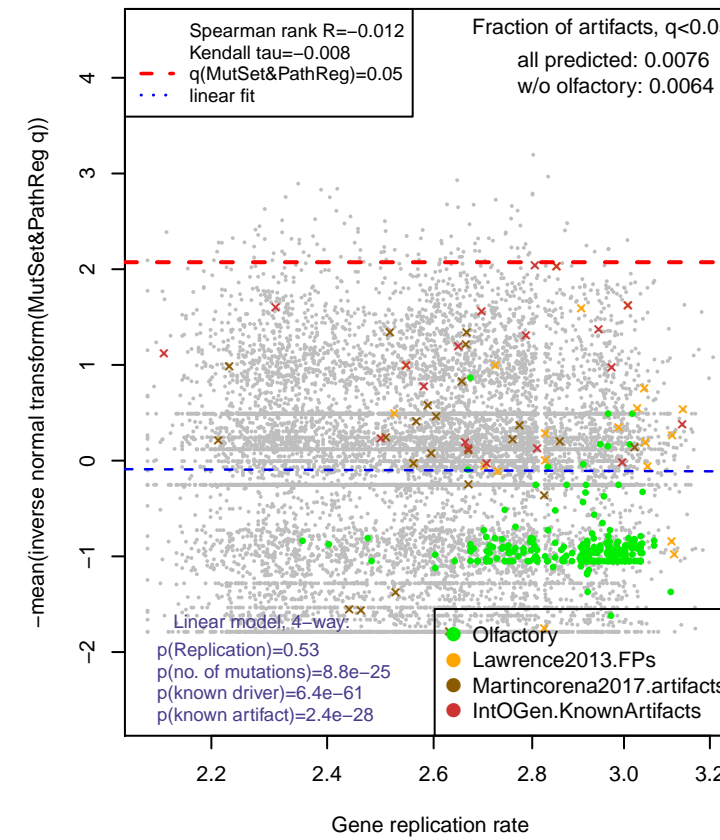

TCGA:OV

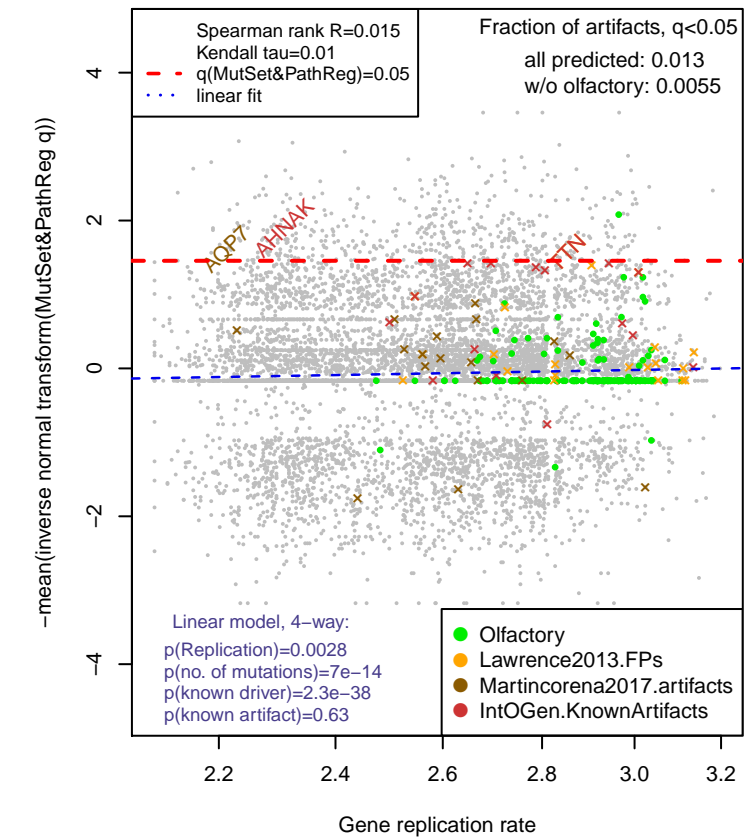

TCGA:LUSC

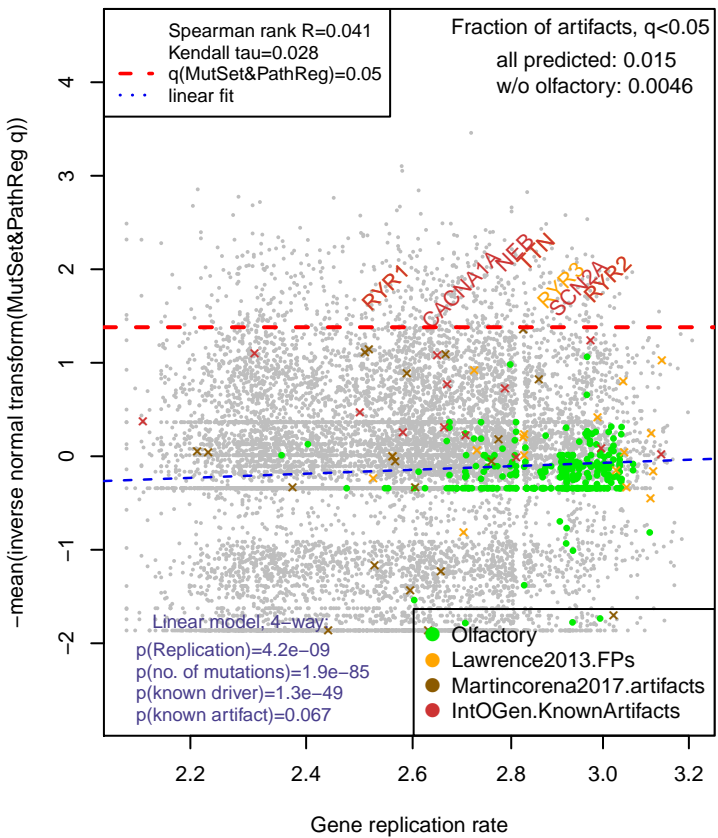

TCGA:LUAD

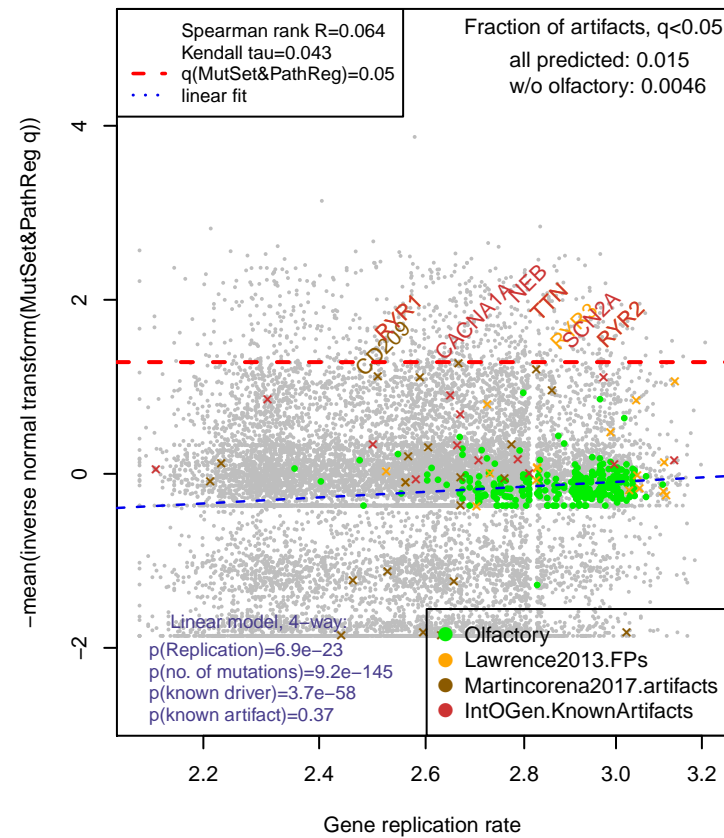

TCGA:GBM

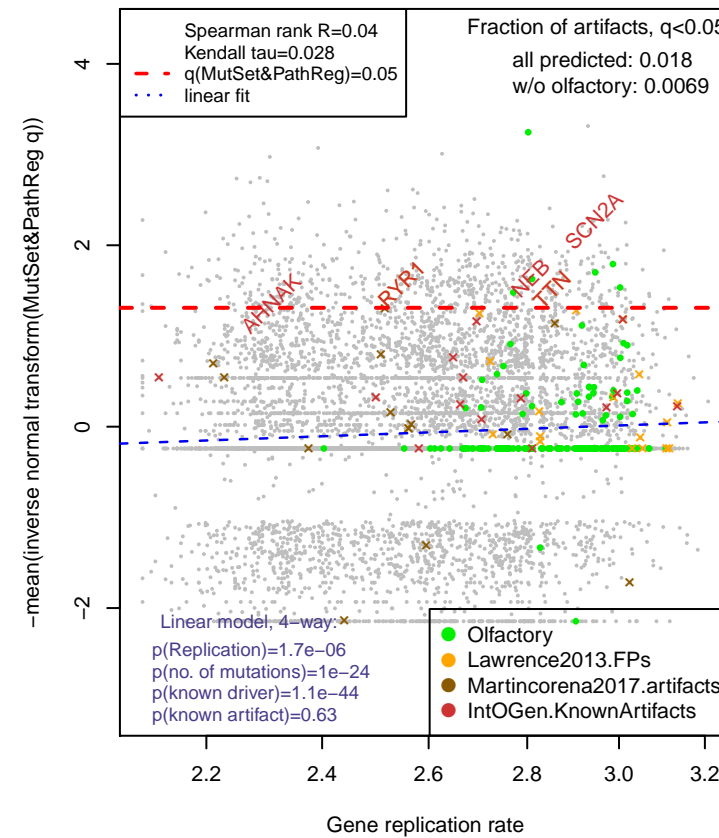

TCGA:COAD

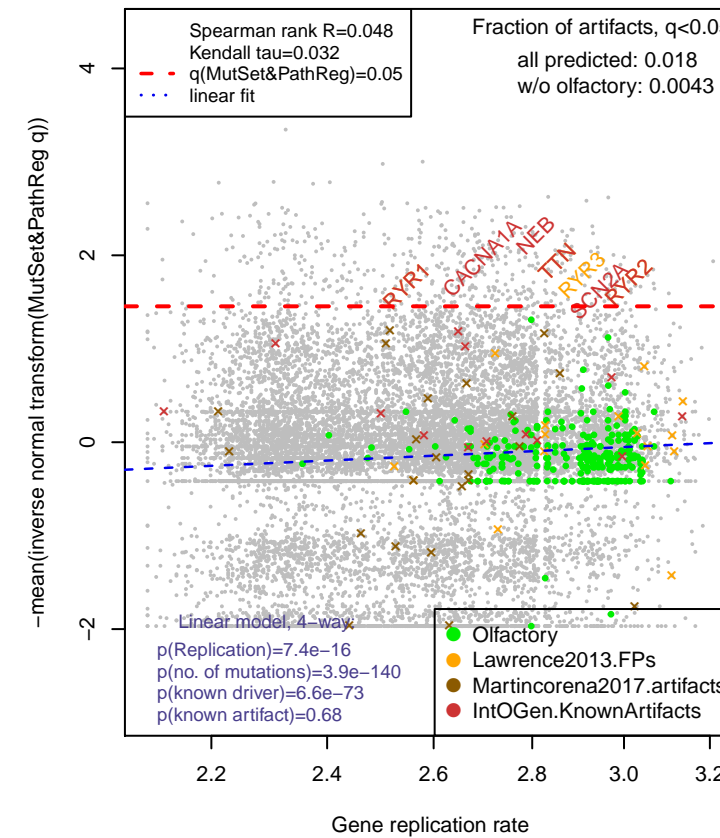

TCGA:BRCA

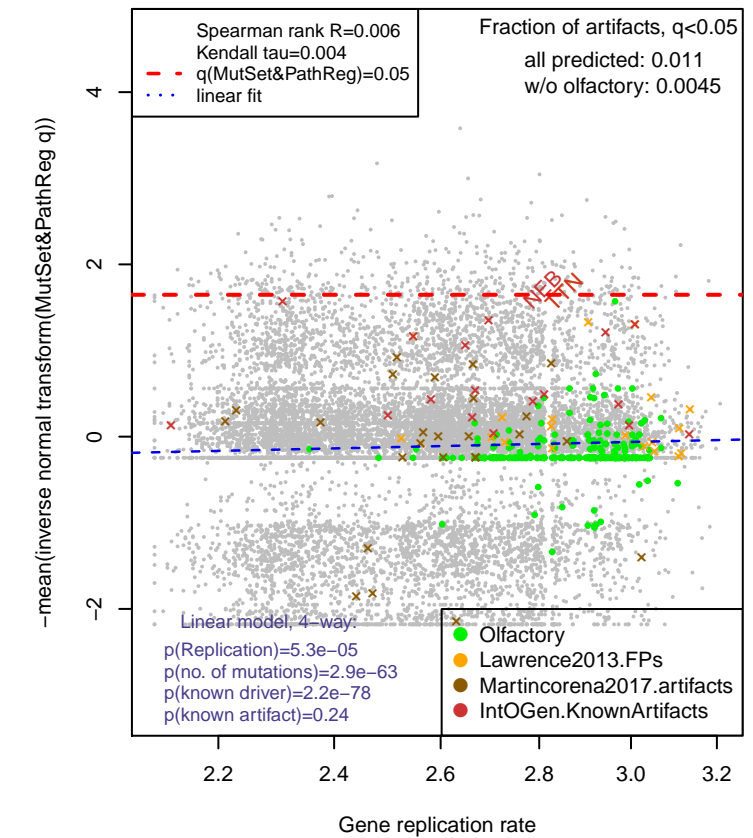



MB(union)

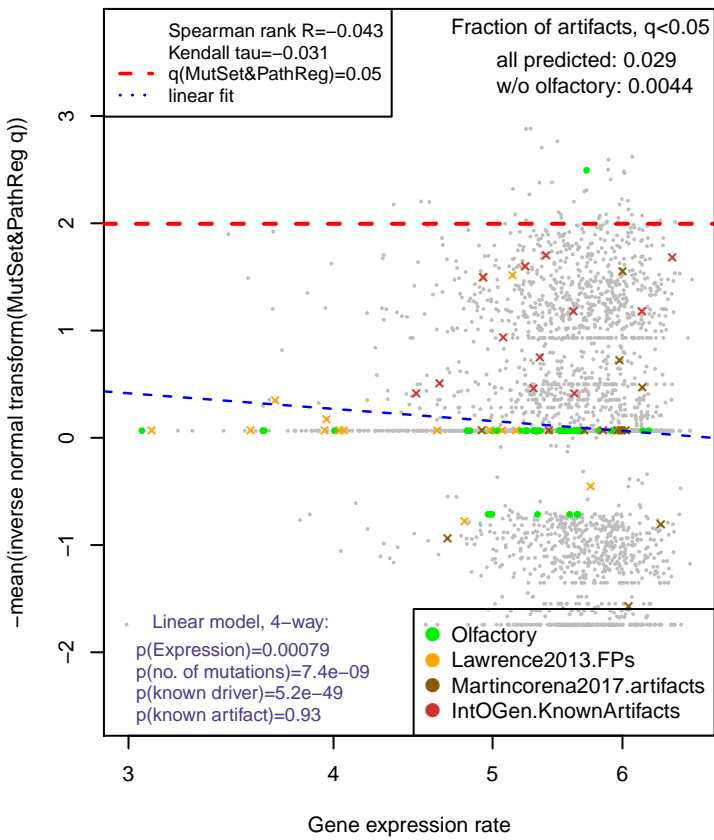

TCGA:SKCM

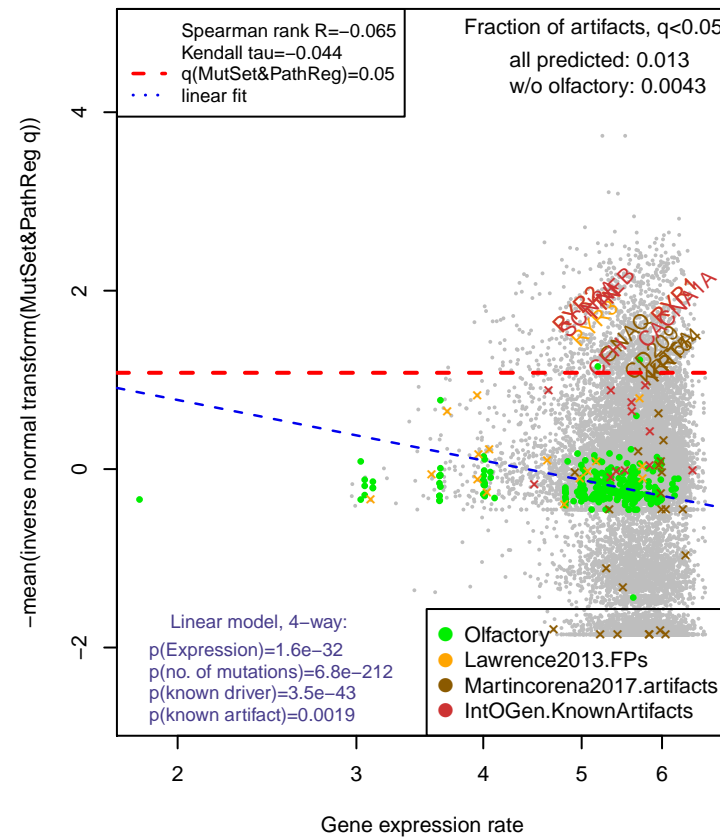

TCGA:PRAD

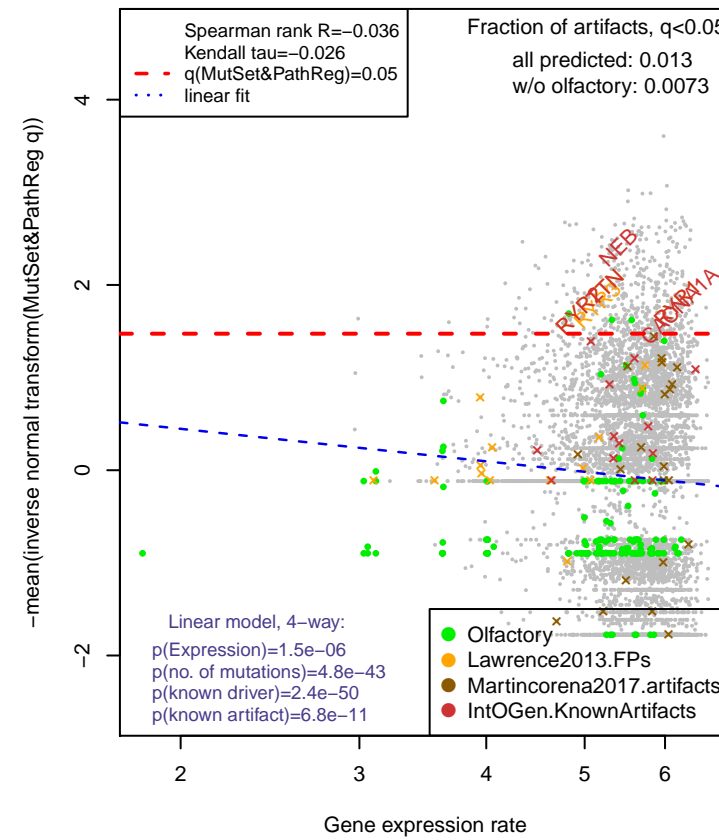

TCGA:PAAD

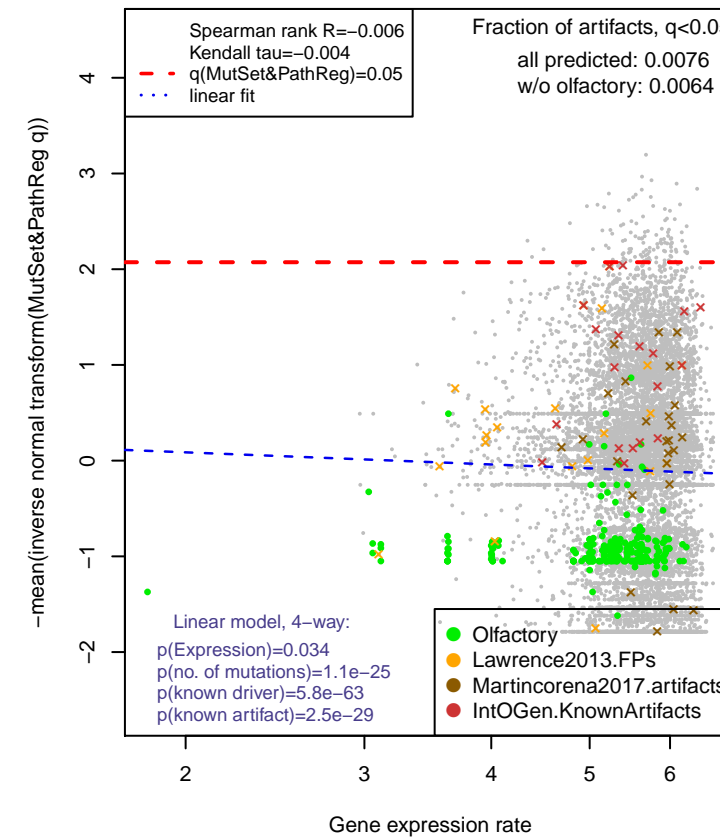

TCGA:OV

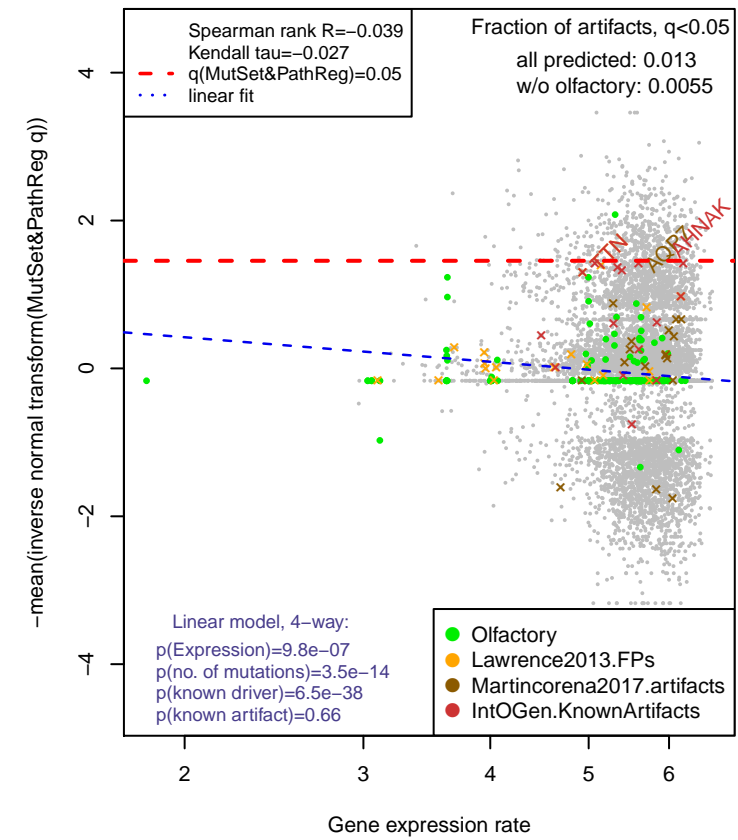

TCGA:LUSC

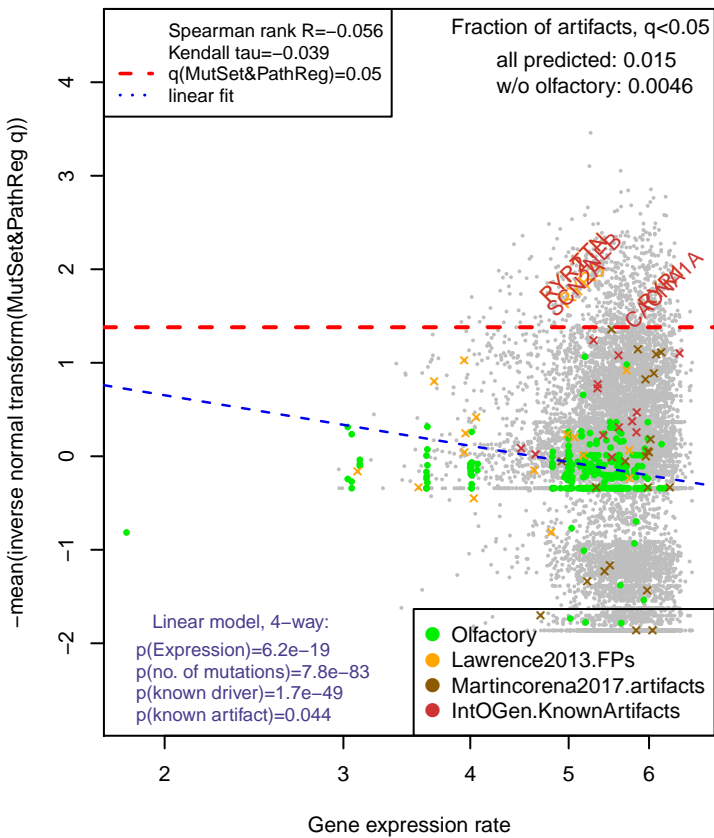

TCGA:LUAD

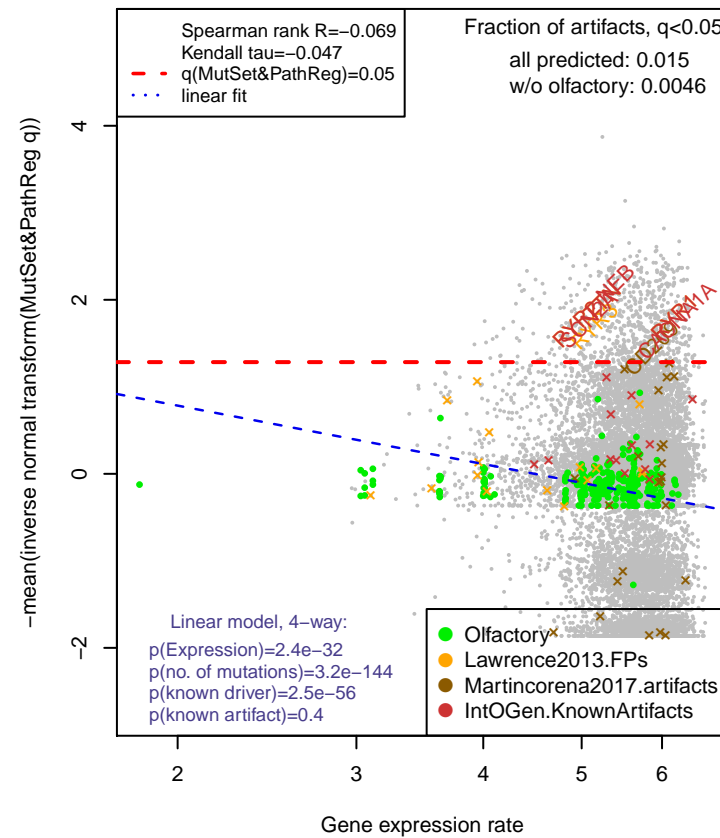

TCGA:GBM

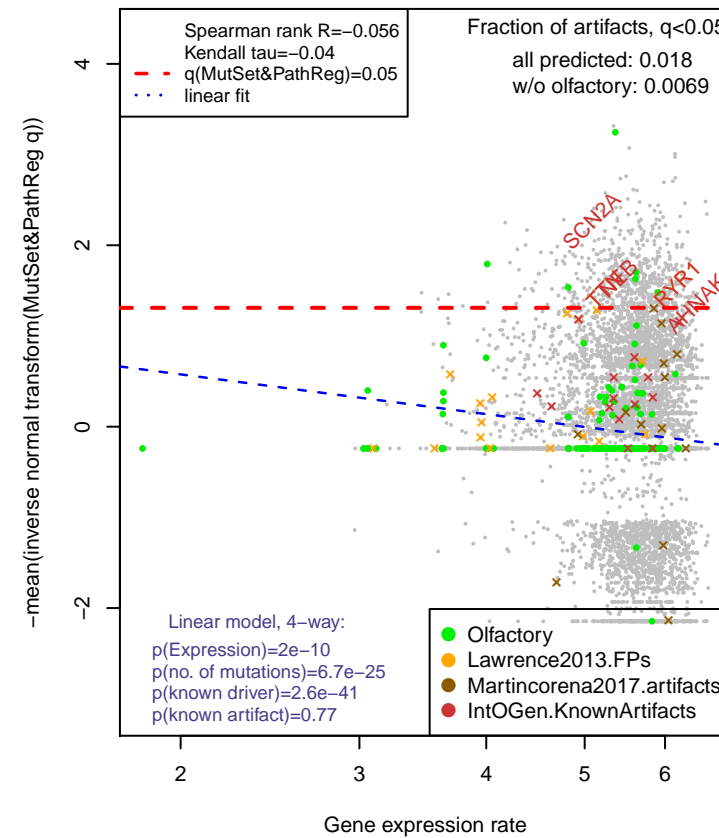

TCGA:COAD

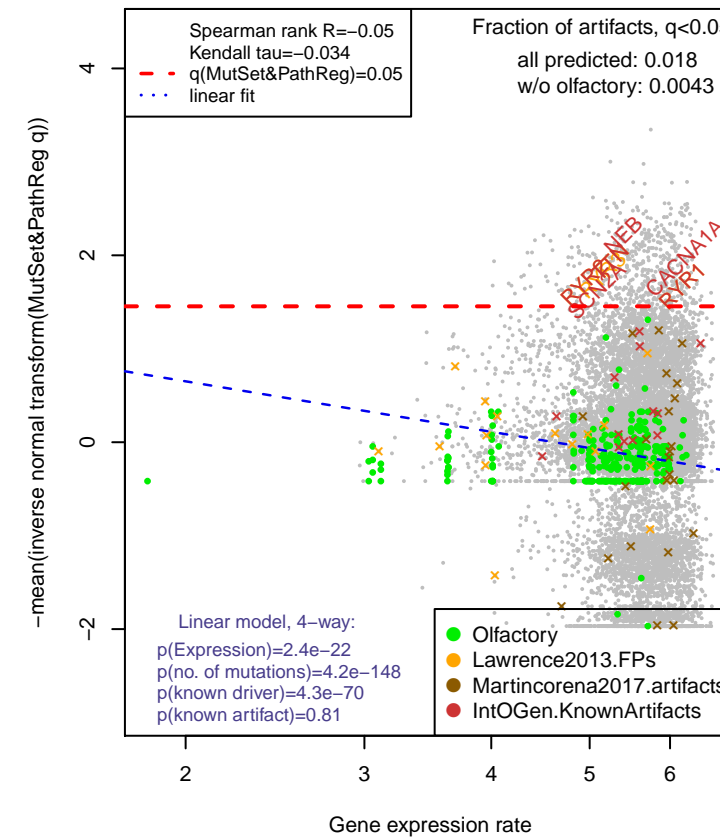

TCGA:BRCA

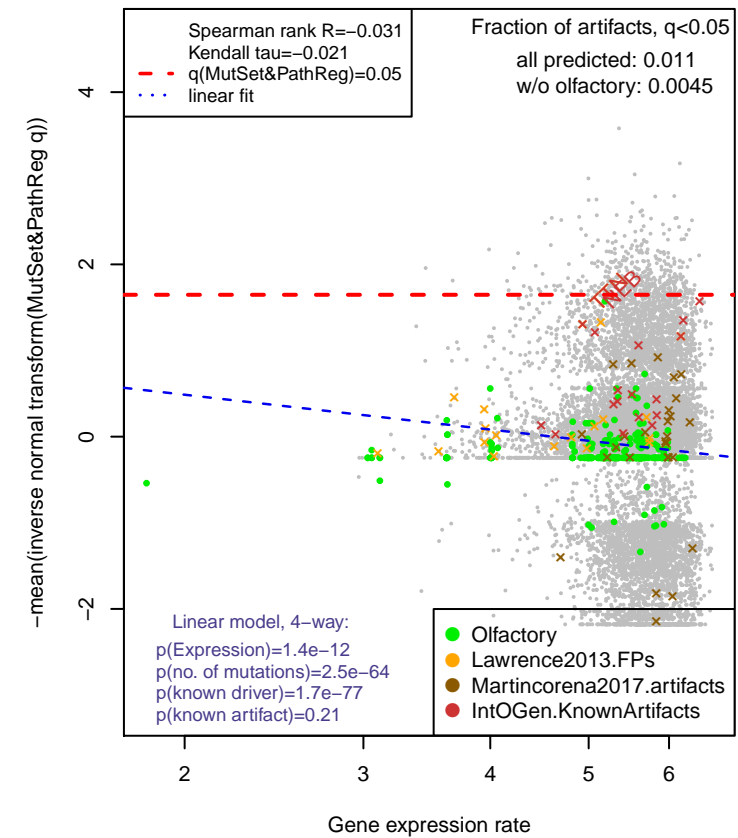

Supplement: supp5 [file elife-74010-supp5-v2.zip]
