# Supplementary material for: Individualized discovery of rare cancer drivers in global network context
Source: eLife journal article supplement (doi:10.7554/elife.74010), 2022-05-20

# Supplementary Figure 11

A

TCGA:OV

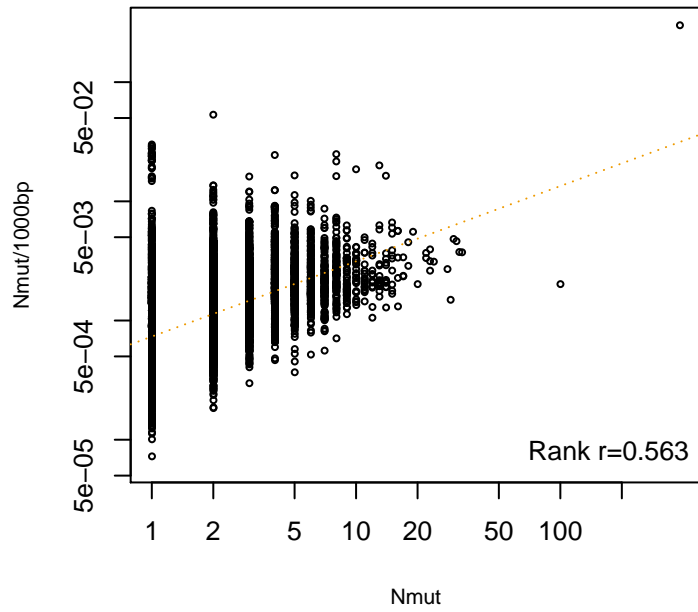

TCGA:OV

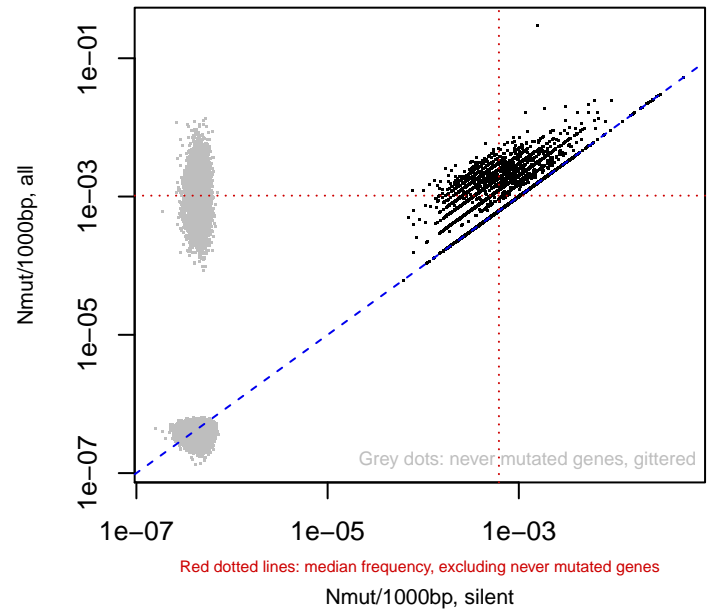

TCGA:OV

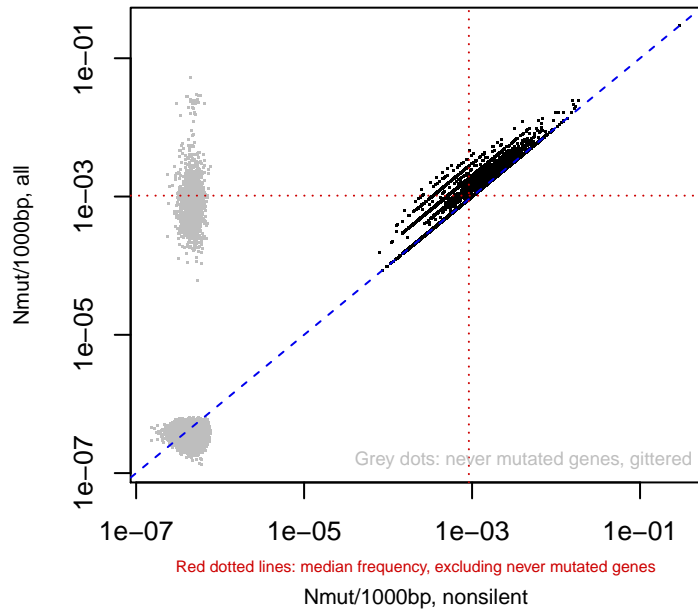

TCGA:OV

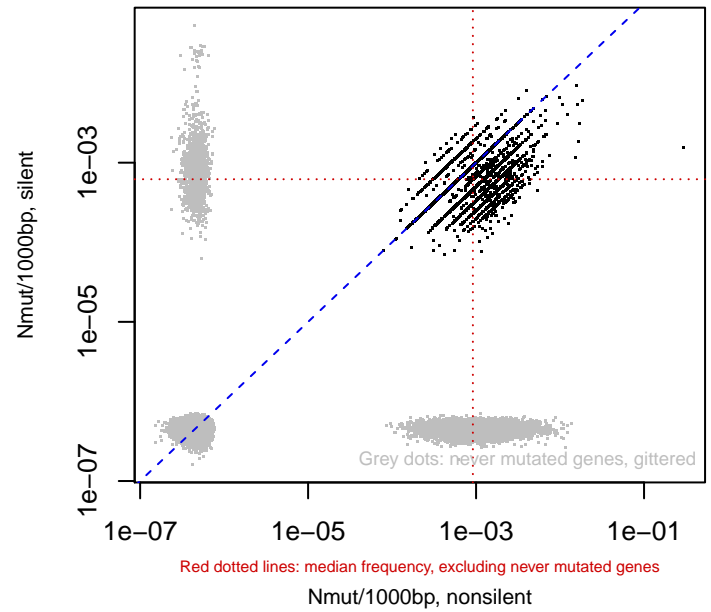

**B**

TCGA:BLCA

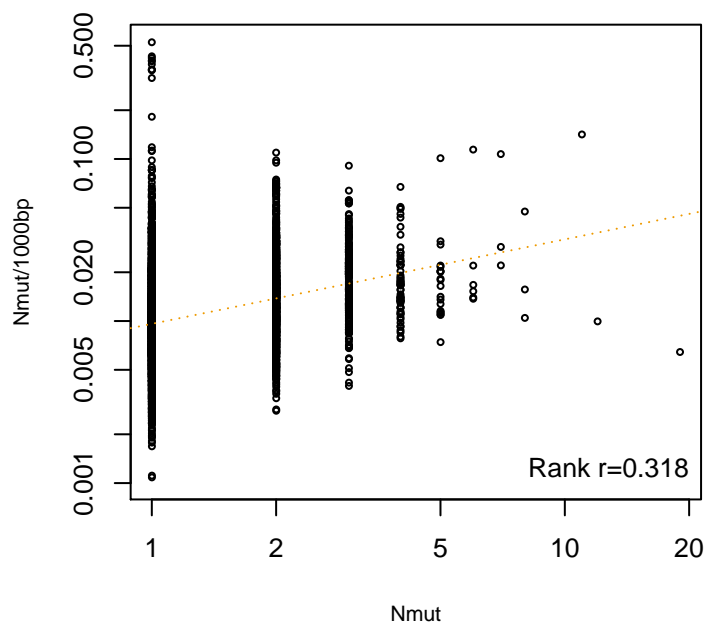

TCGA:BLCA

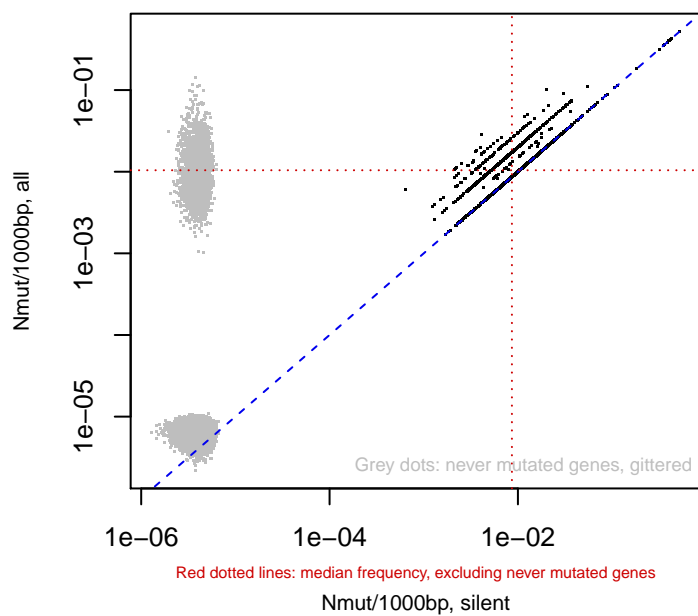

TCGA:BLCA

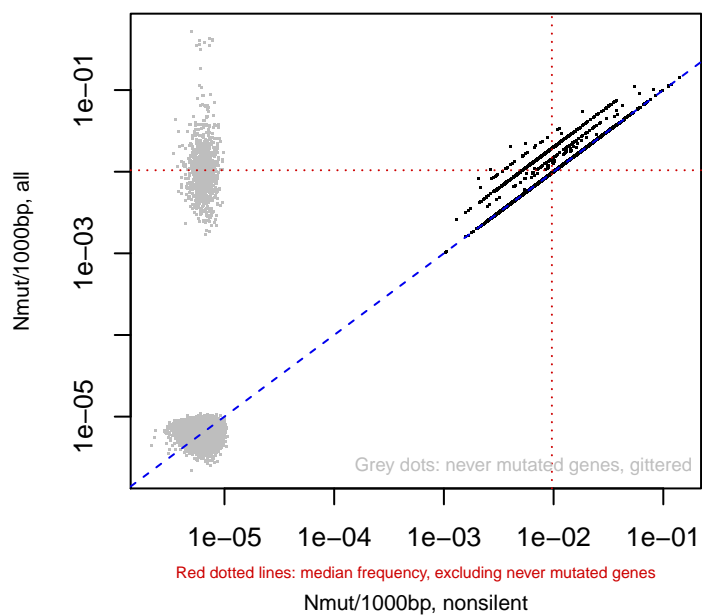

TCGA:BLCA

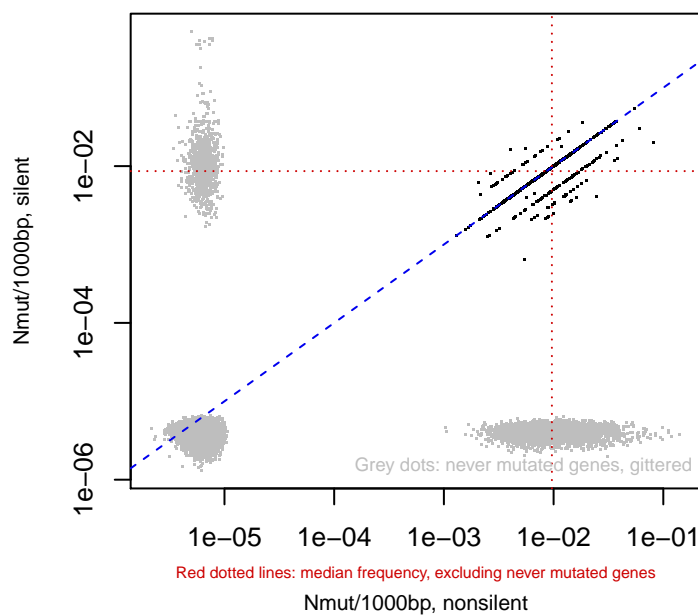

**C**

TCGA:COAD

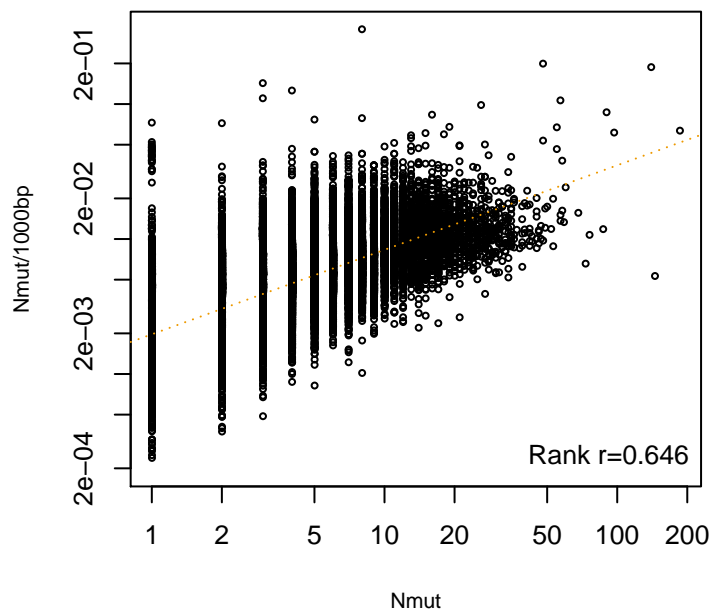

TCGA:COAD

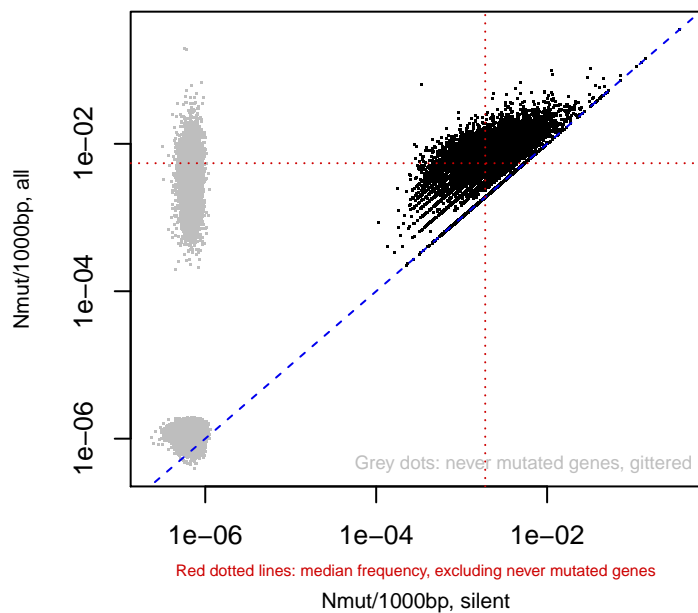

TCGA:COAD

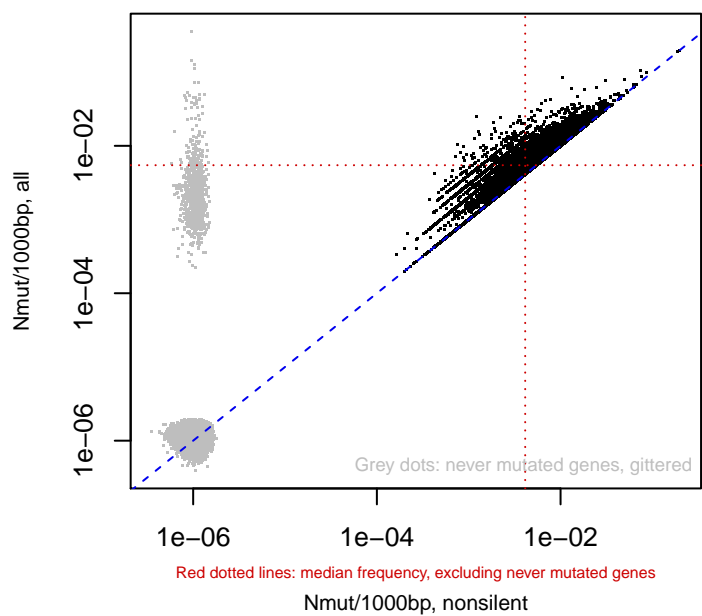

TCGA:COAD

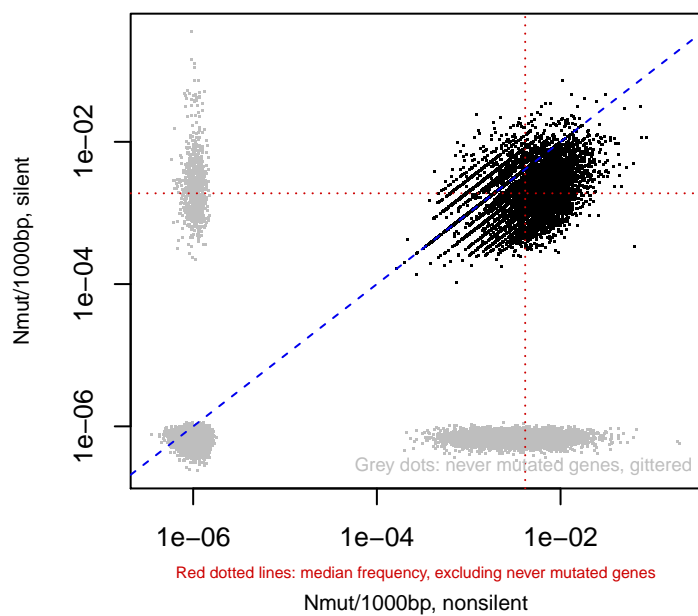

D

TCGA:PRAD

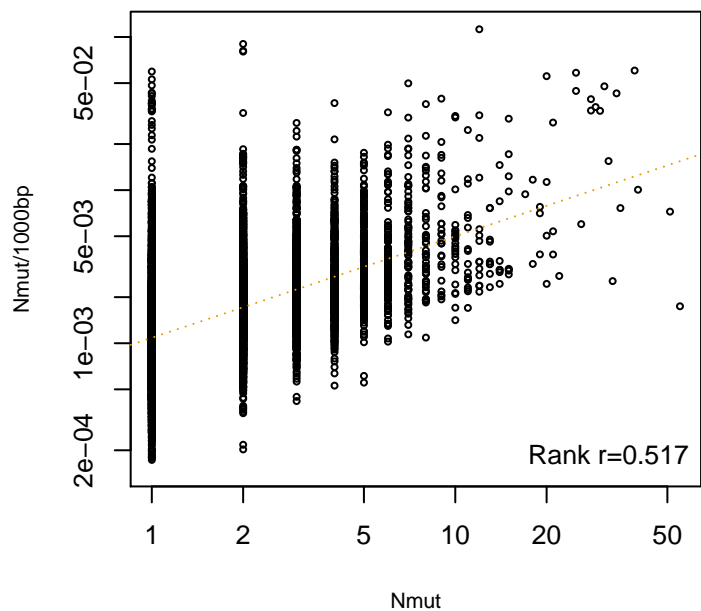

TCGA:PRAD

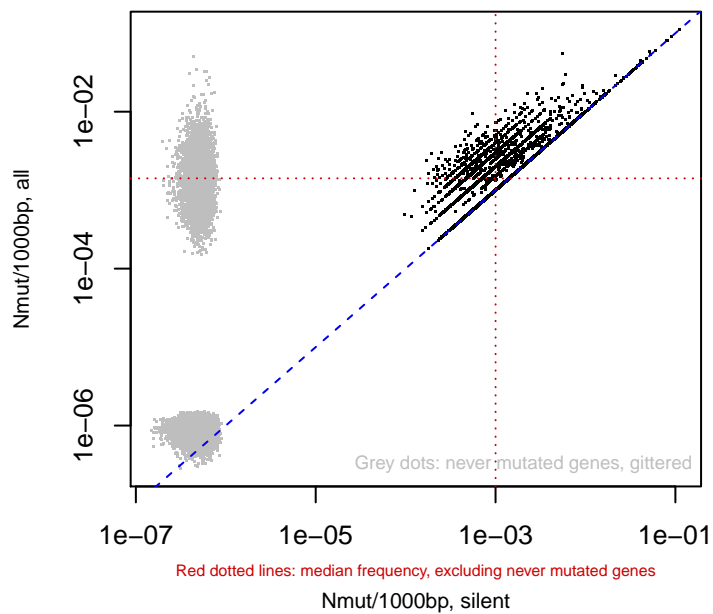

TCGA:PRAD

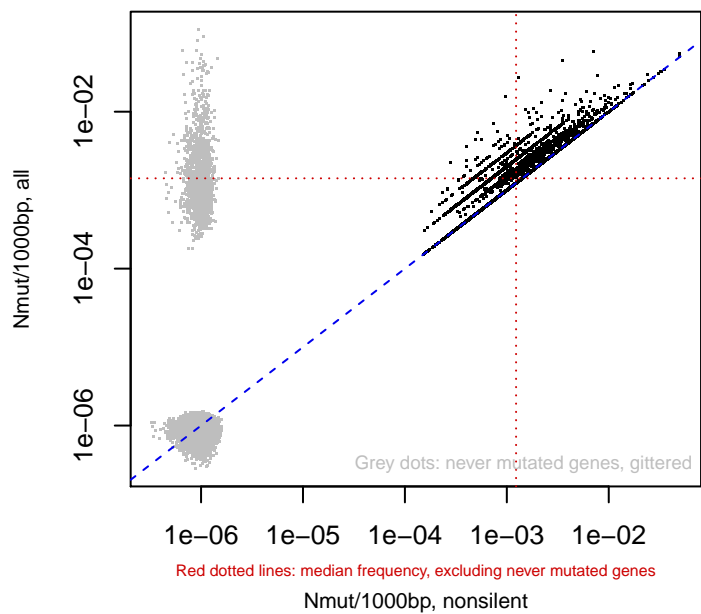

TCGA:PRAD

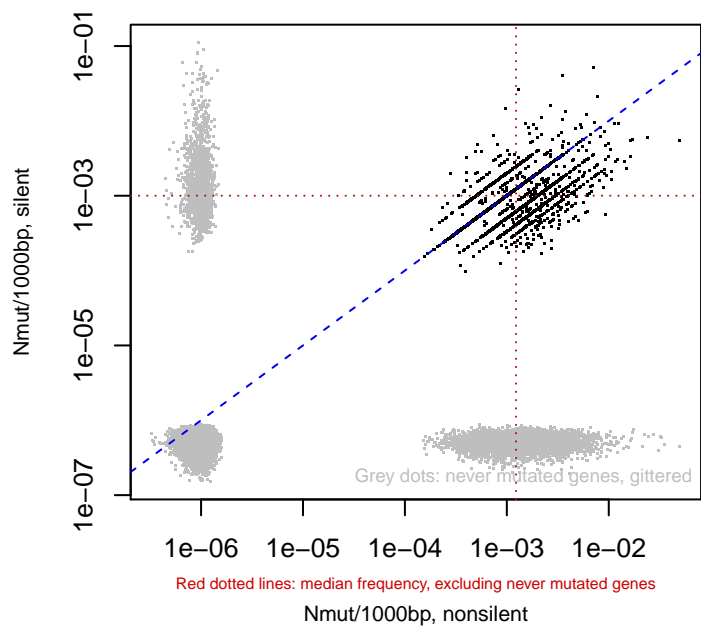



TCGA:PAAD

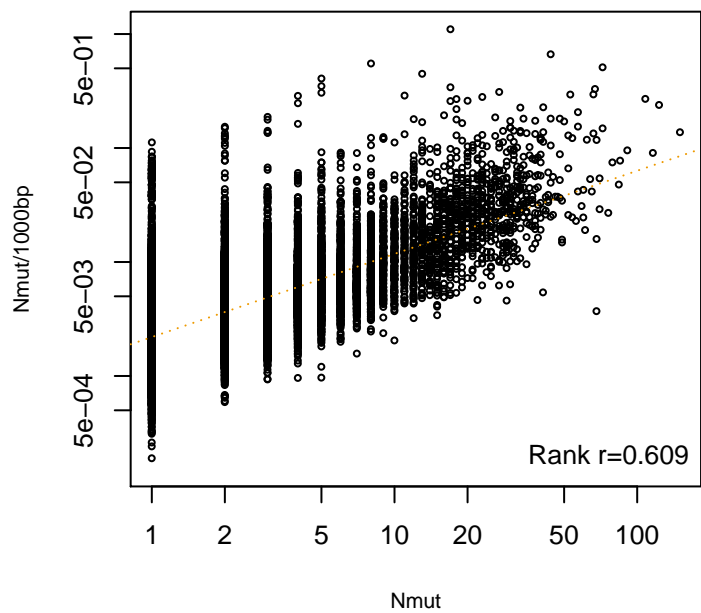

TCGA:PAAD

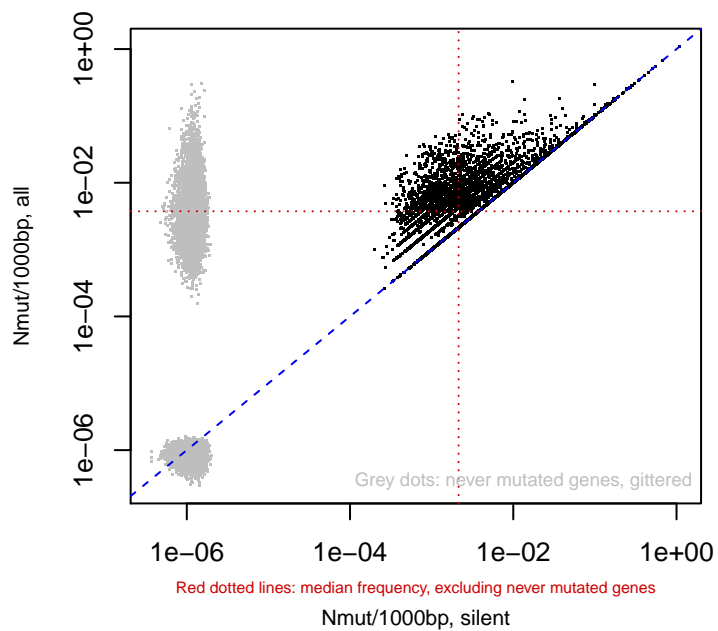

TCGA:PAAD

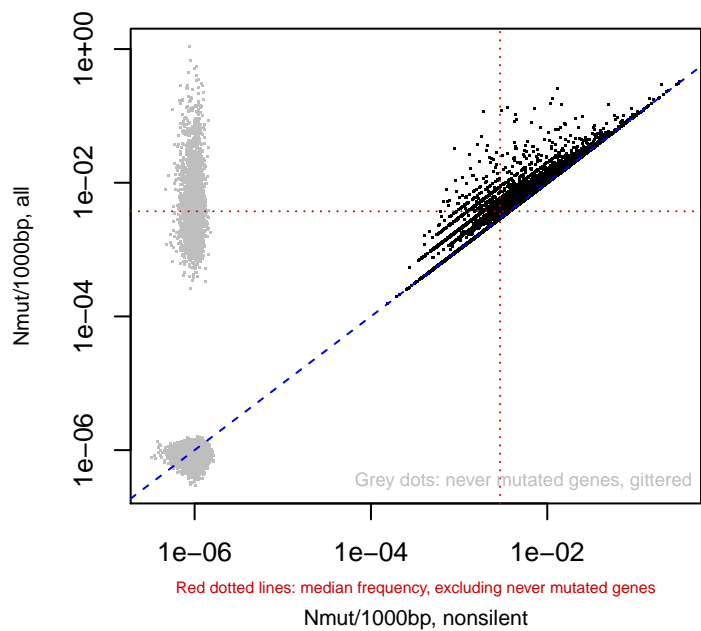

TCGA:PAAD

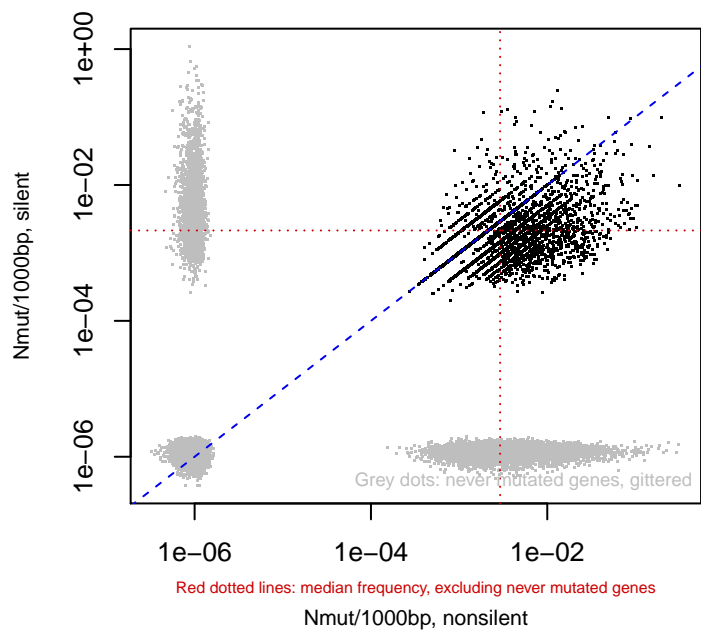

F

TCGA:SKCM

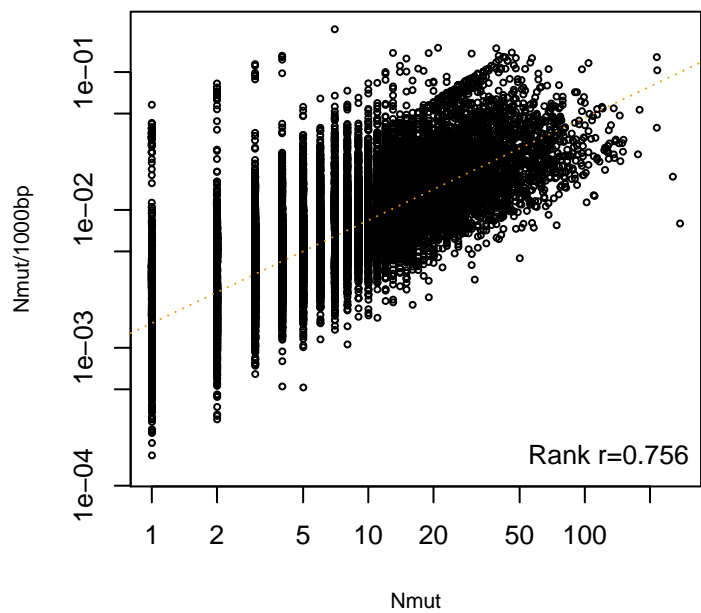

TCGA:SKCM

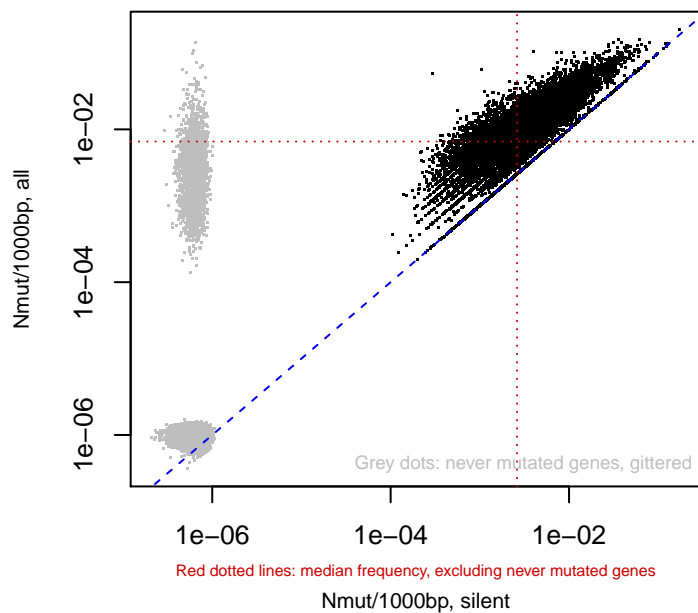

TCGA:SKCM

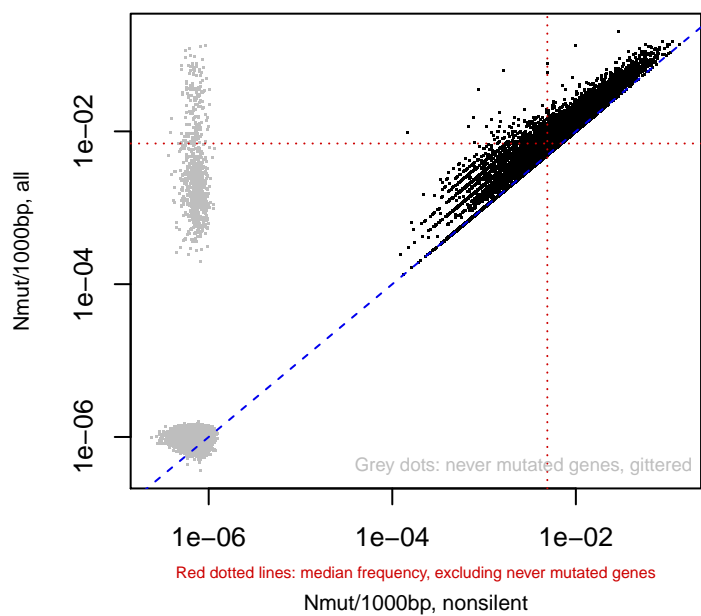

TCGA:SKCM

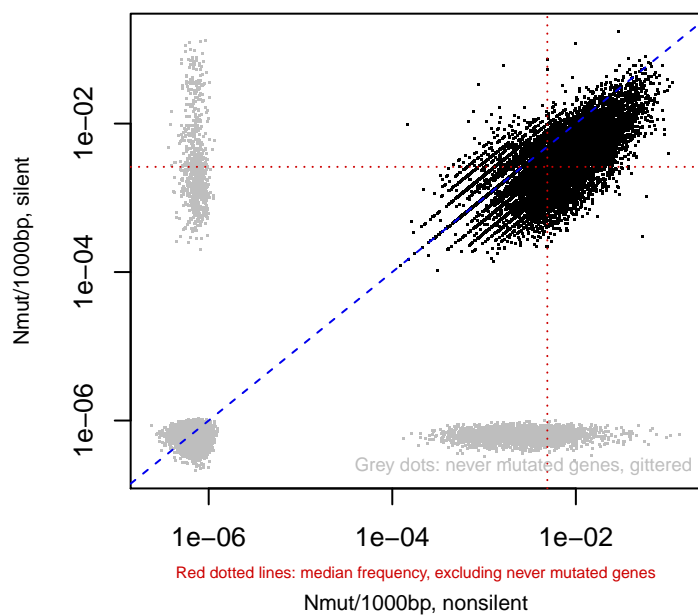

TCGA:GBM

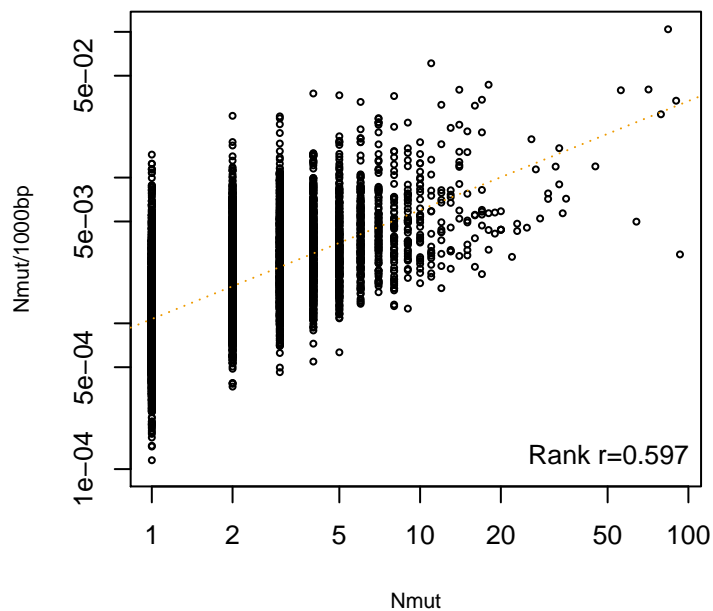

TCGA:GBM

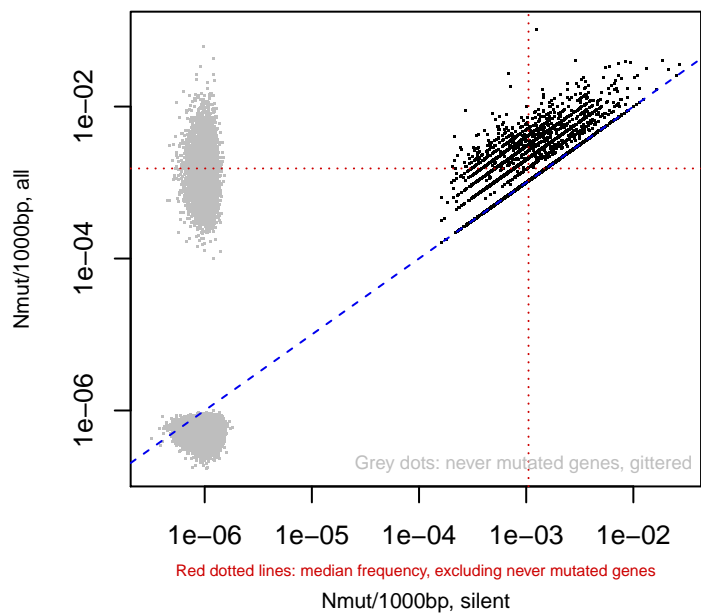

TCGA:GBM

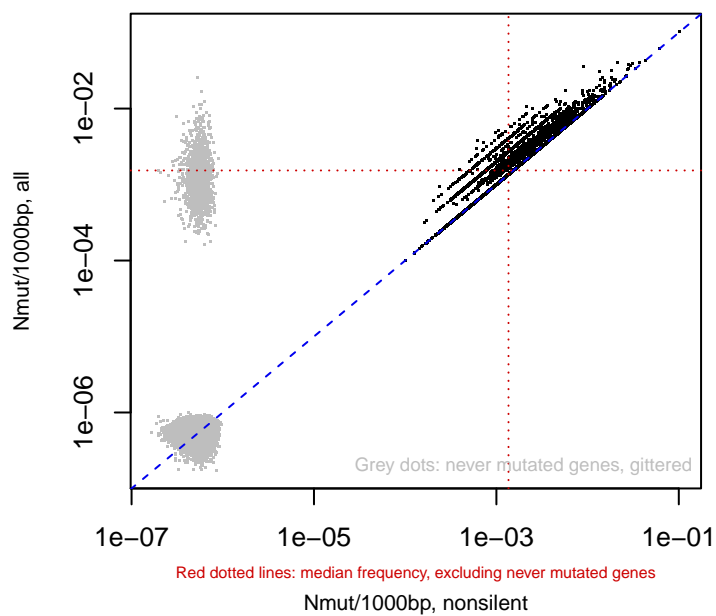

TCGA:GBM

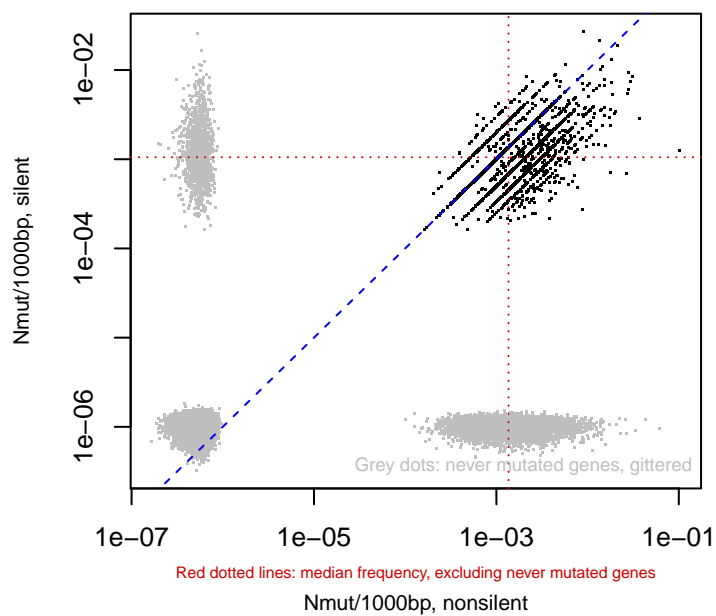

TCGA:BRCA

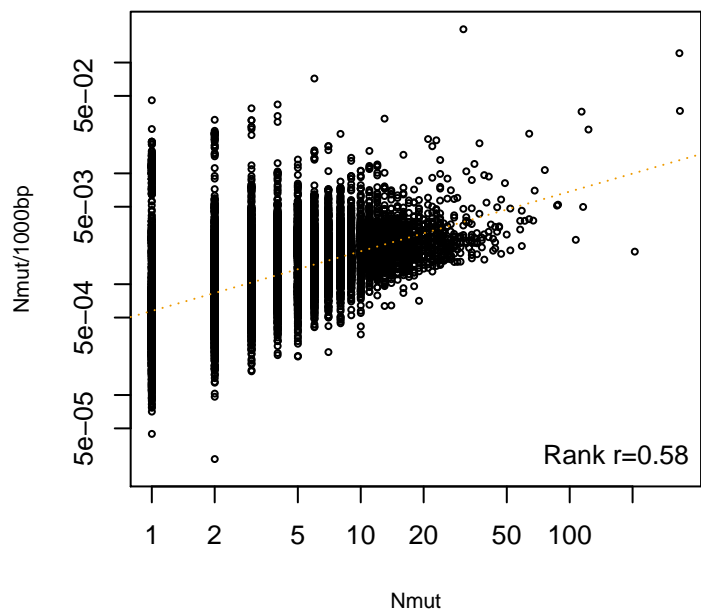

TCGA:BRCA

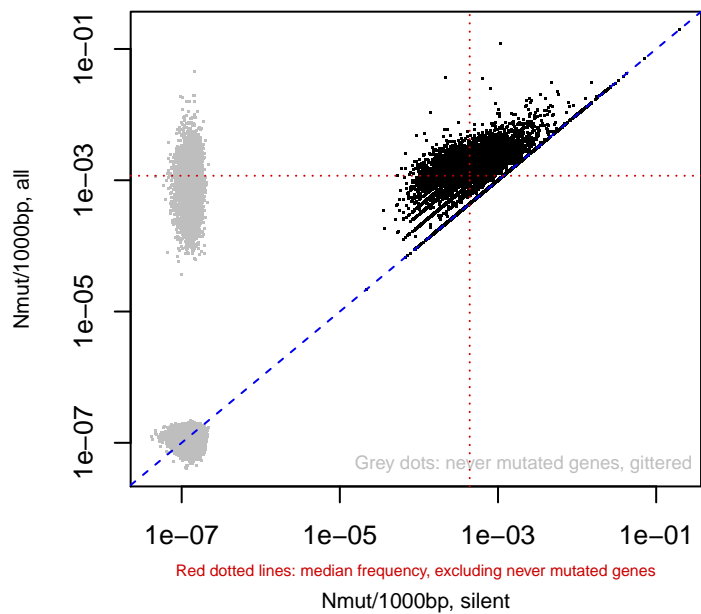

TCGA:BRCA

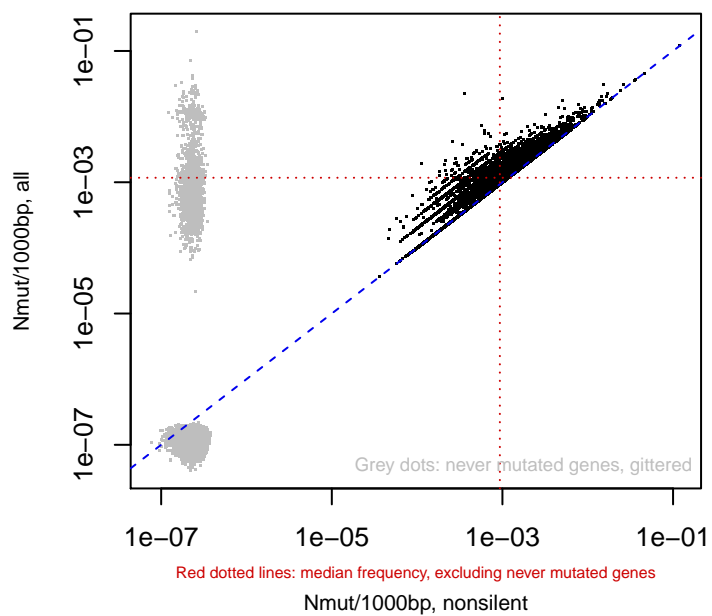

TCGA:BRCA

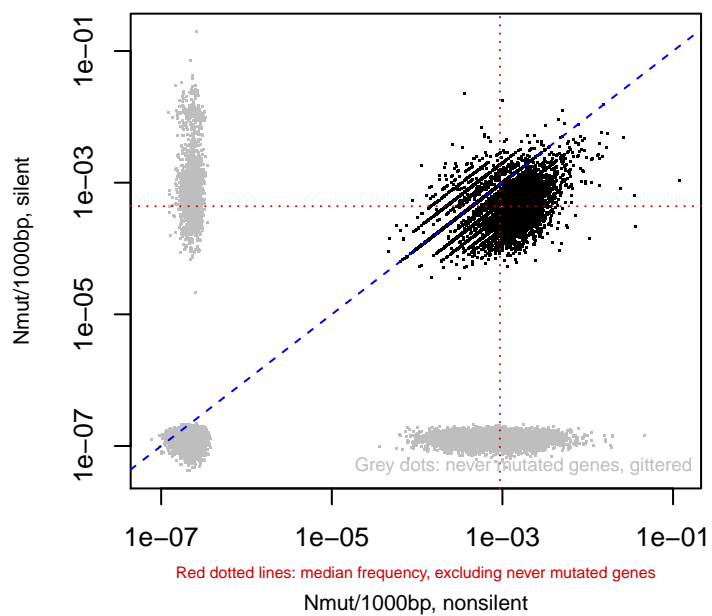

TCGA:LUAD

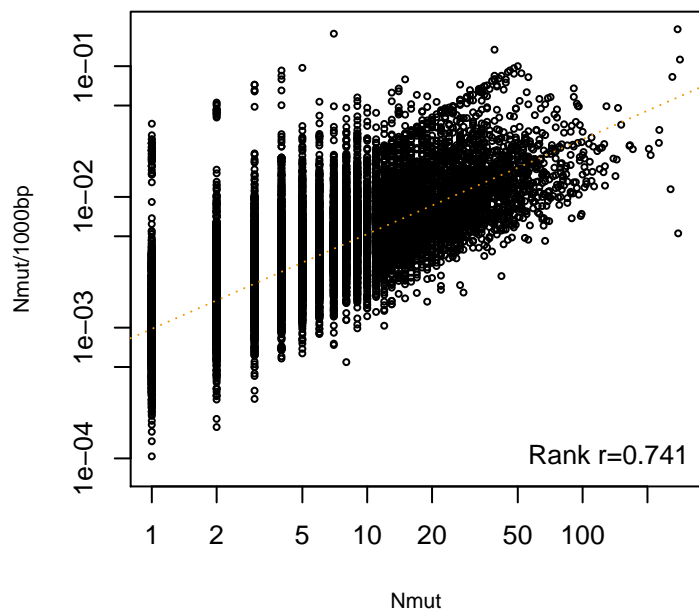

TCGA:LUAD

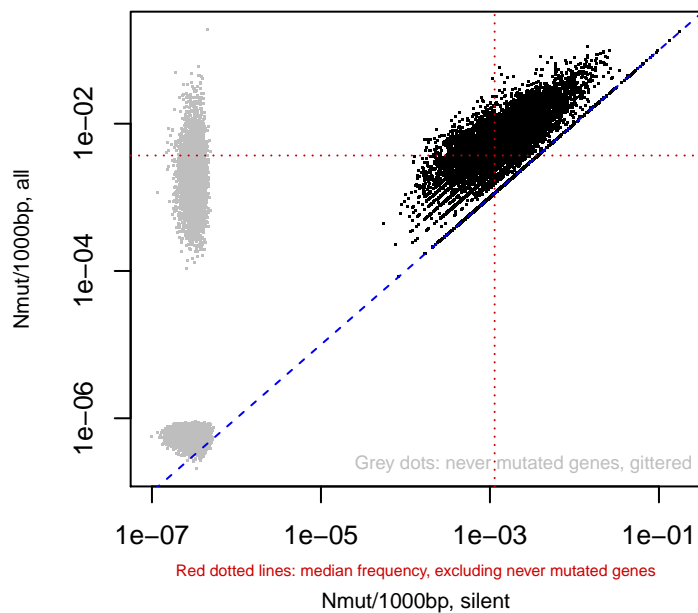

TCGA:LUAD

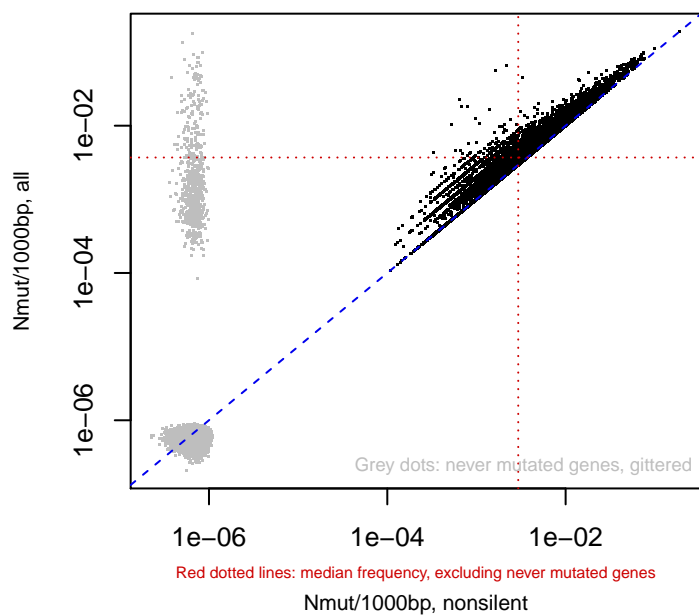

TCGA:LUAD

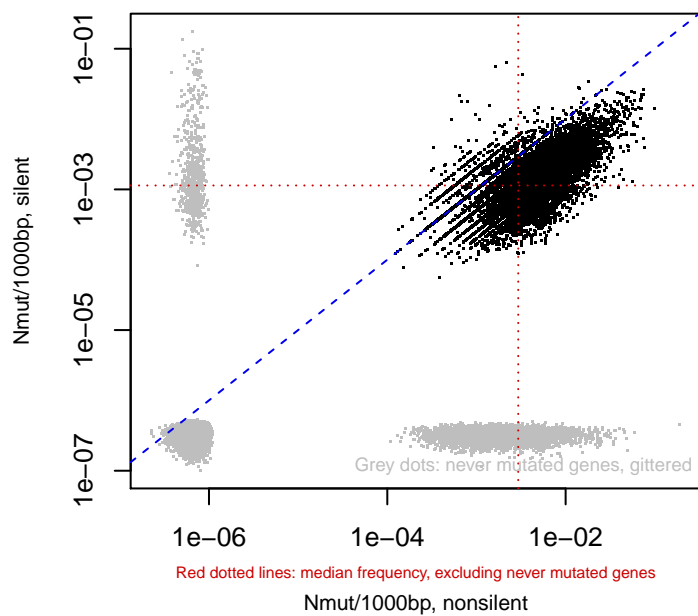

TCGA:LUSC

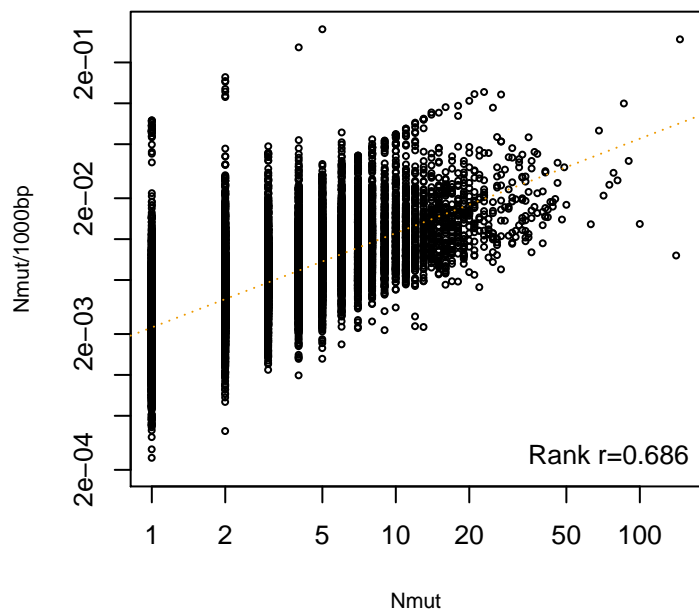

TCGA:LUSC

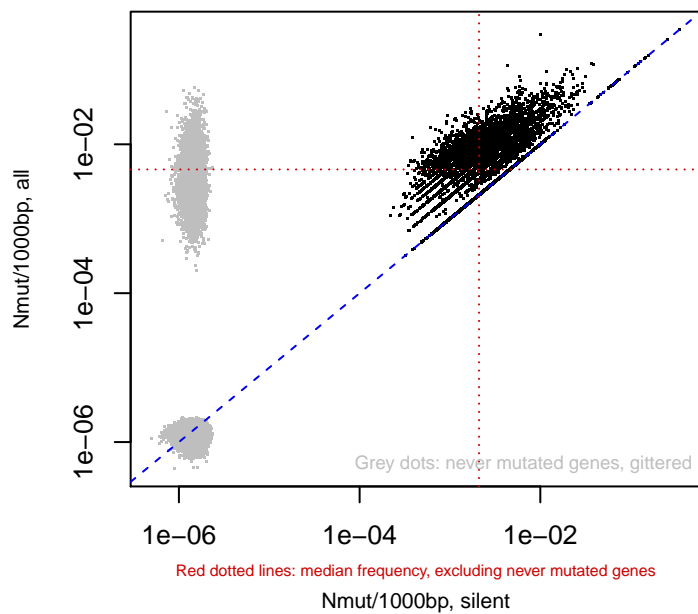

TCGA:LUSC

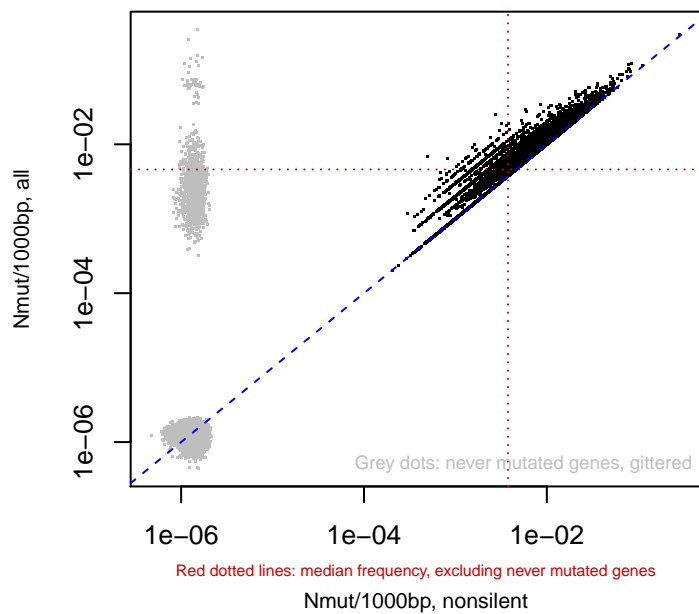

TCGA:LUSC

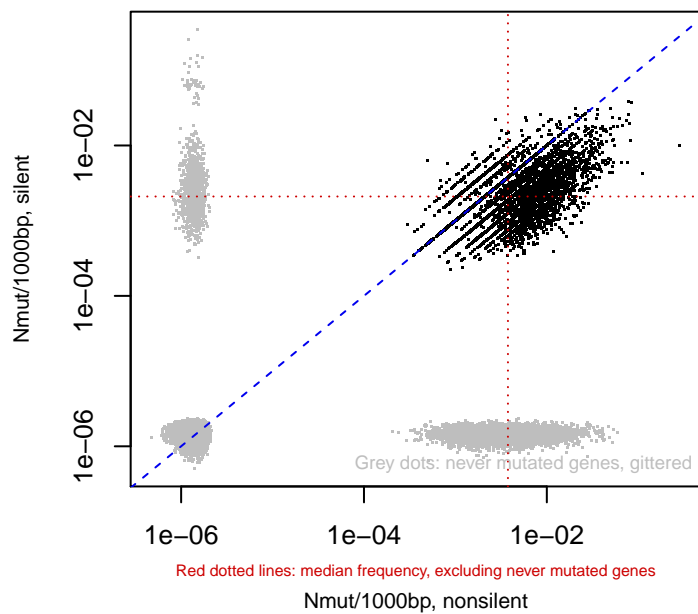

K

MB(union)

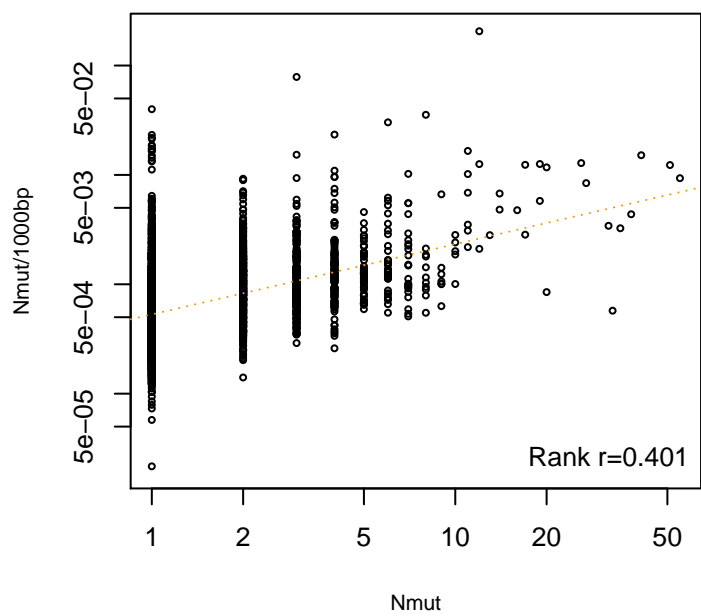

Supplement: supp7 [file SupplementaryFigure7.Nmut_vs_frequency.pdf › SupplementaryFigure7.Nmut_vs_frequency.pdf]
