# Supplementary material for: Individualized discovery of rare cancer drivers in global network context
Source: eLife journal article supplement (doi:10.7554/elife.74010), 2022-05-20
Supplement: supp1 [file SupplementaryFigure1.Models.pdf › SupplementaryFigure1.Models/SupplementaryFigure1.Models.pdf]

TCGA:BRCA, test set

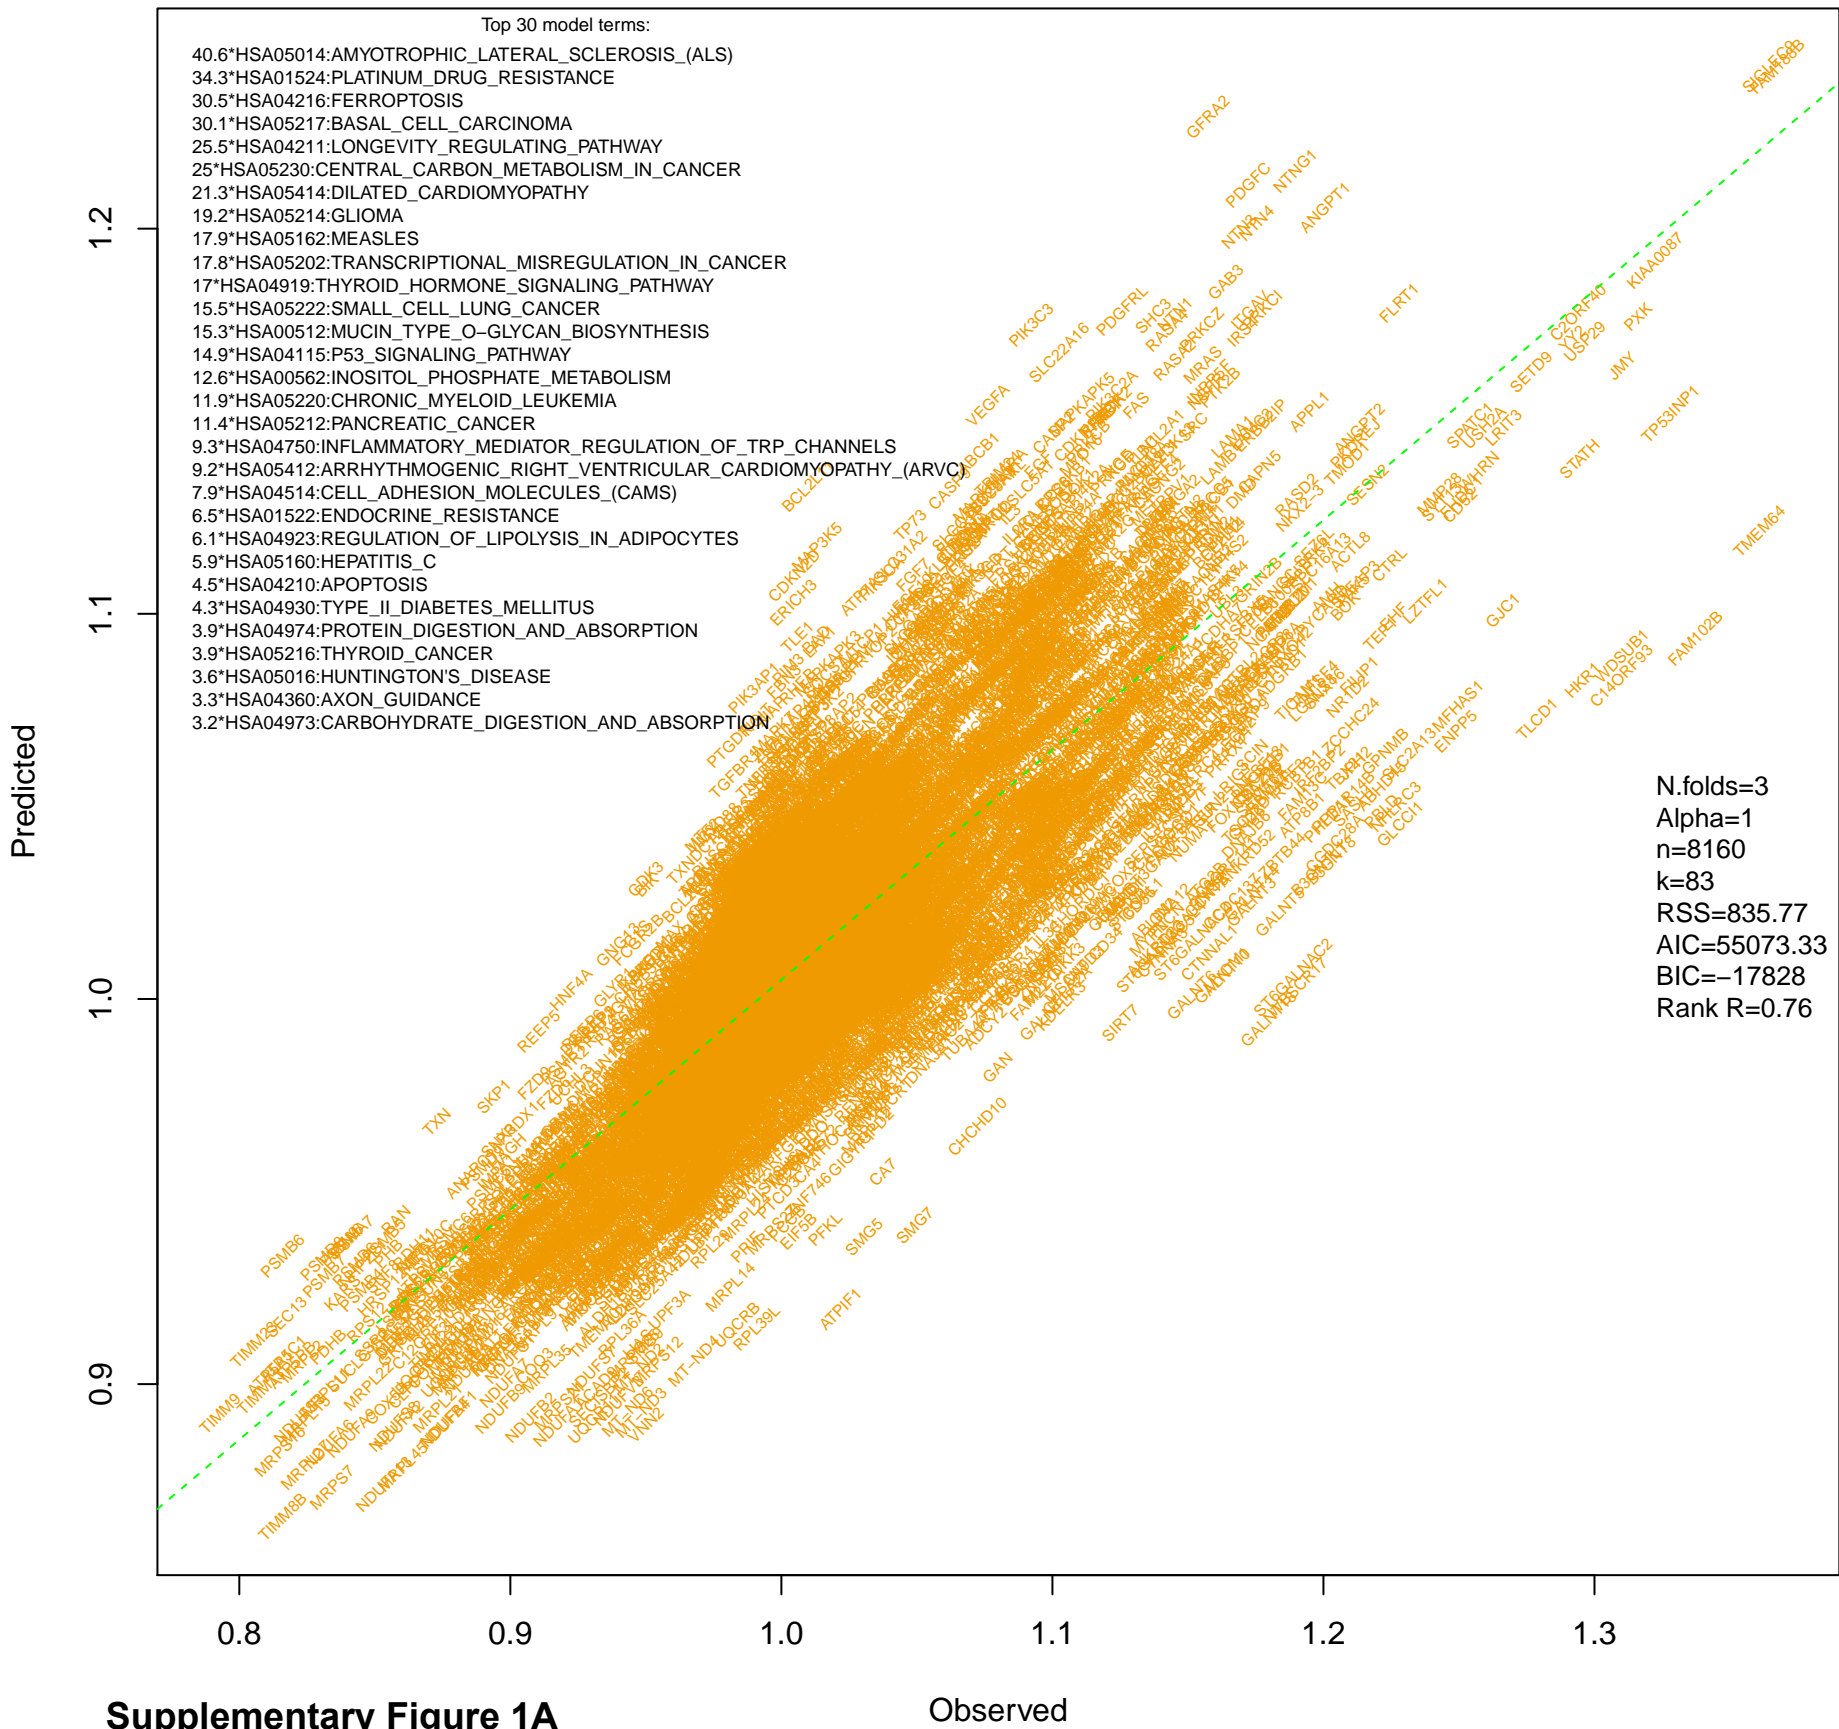

Supplementary Figure 1A

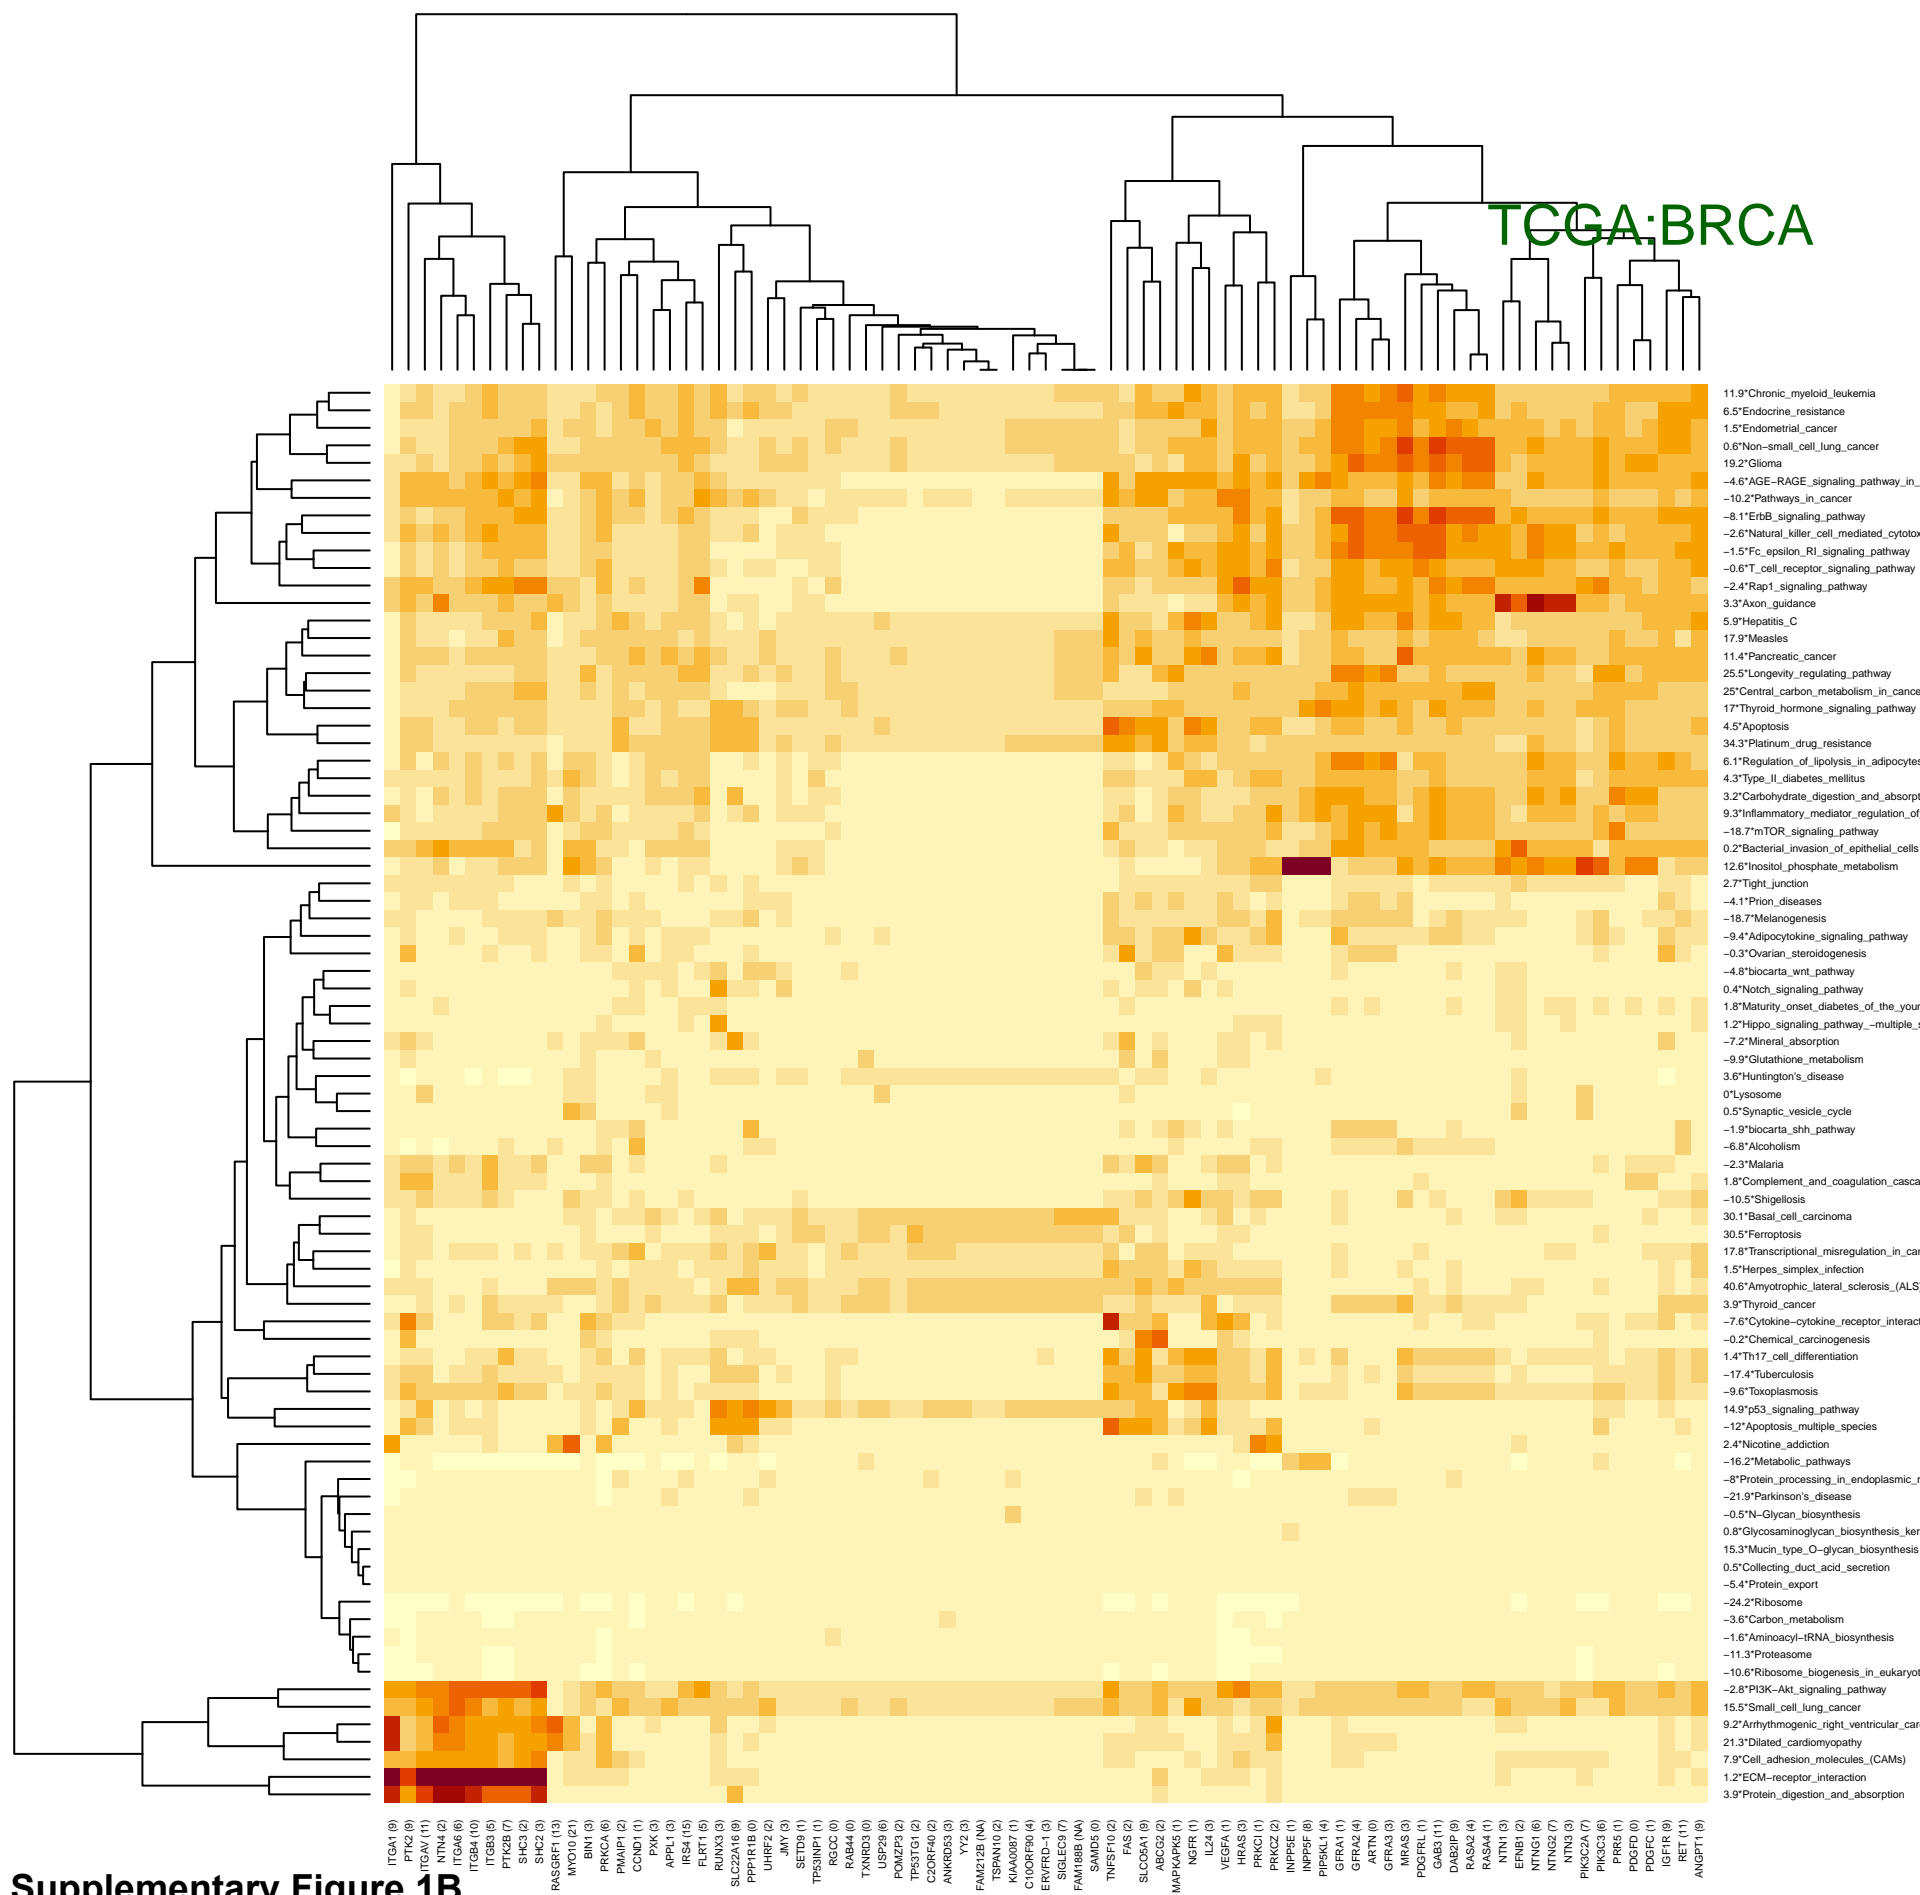

Supplementary Figure 1B

# TCGA:COAD, test set

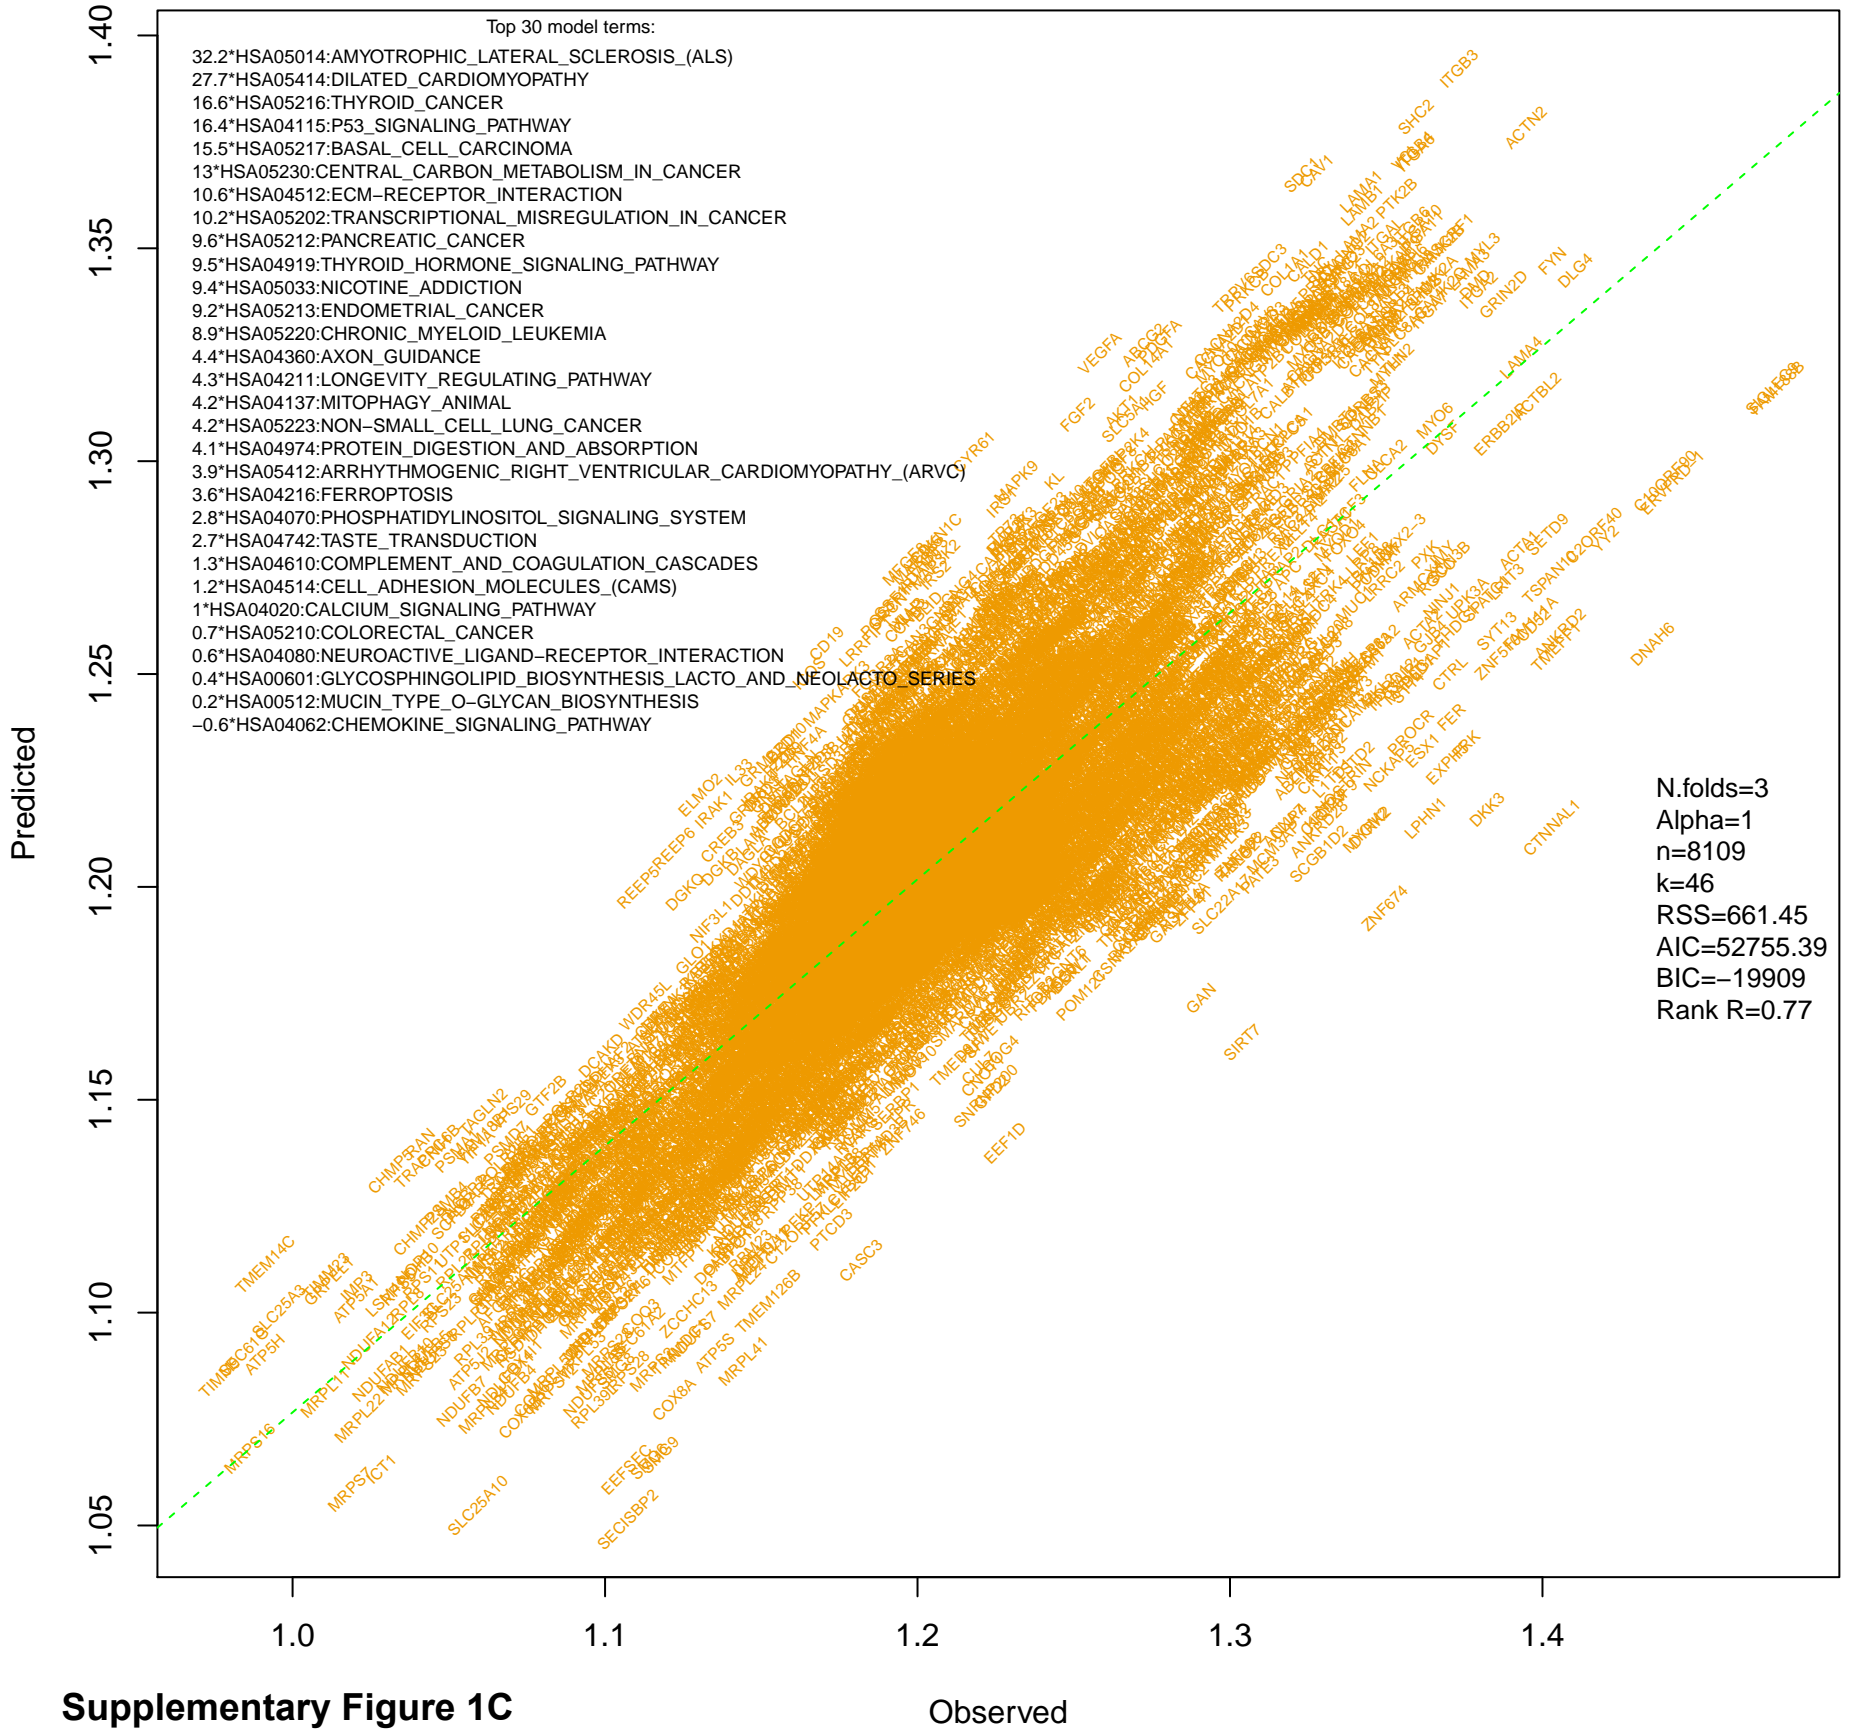

Supplementary Figure 1C

TCGA:COAD

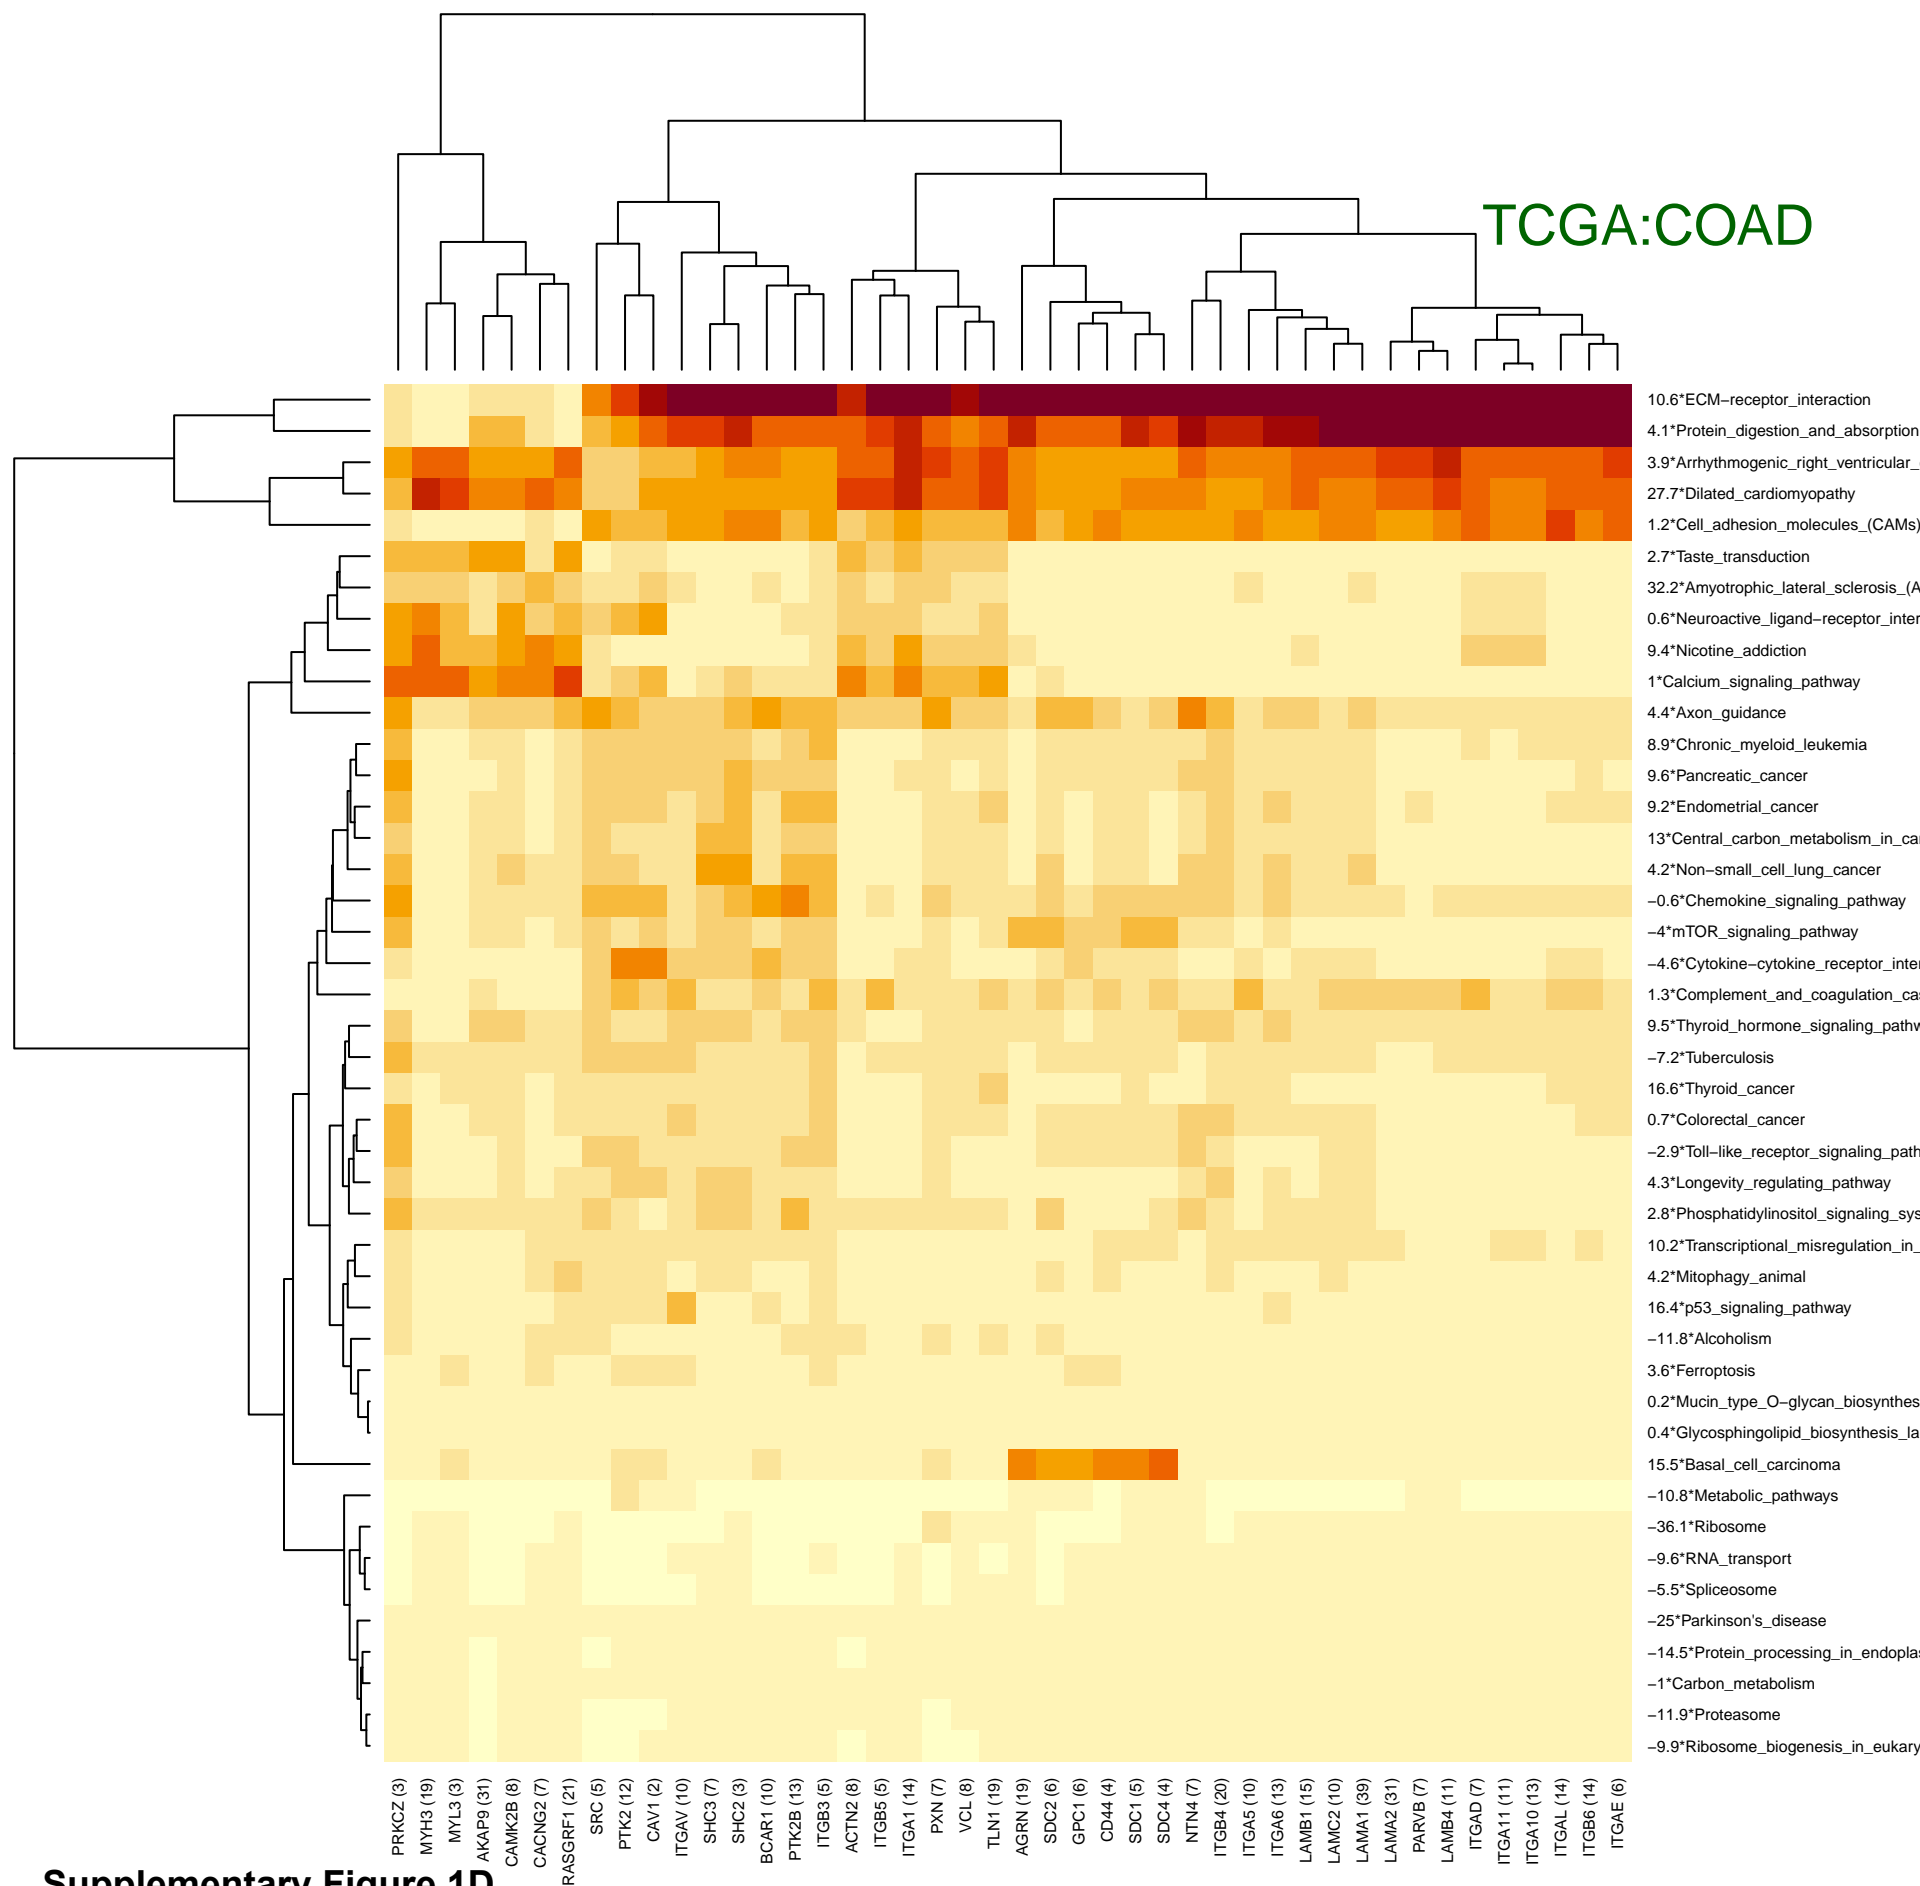

Supplementary Figure 1D



# TCGA:GBM, test set

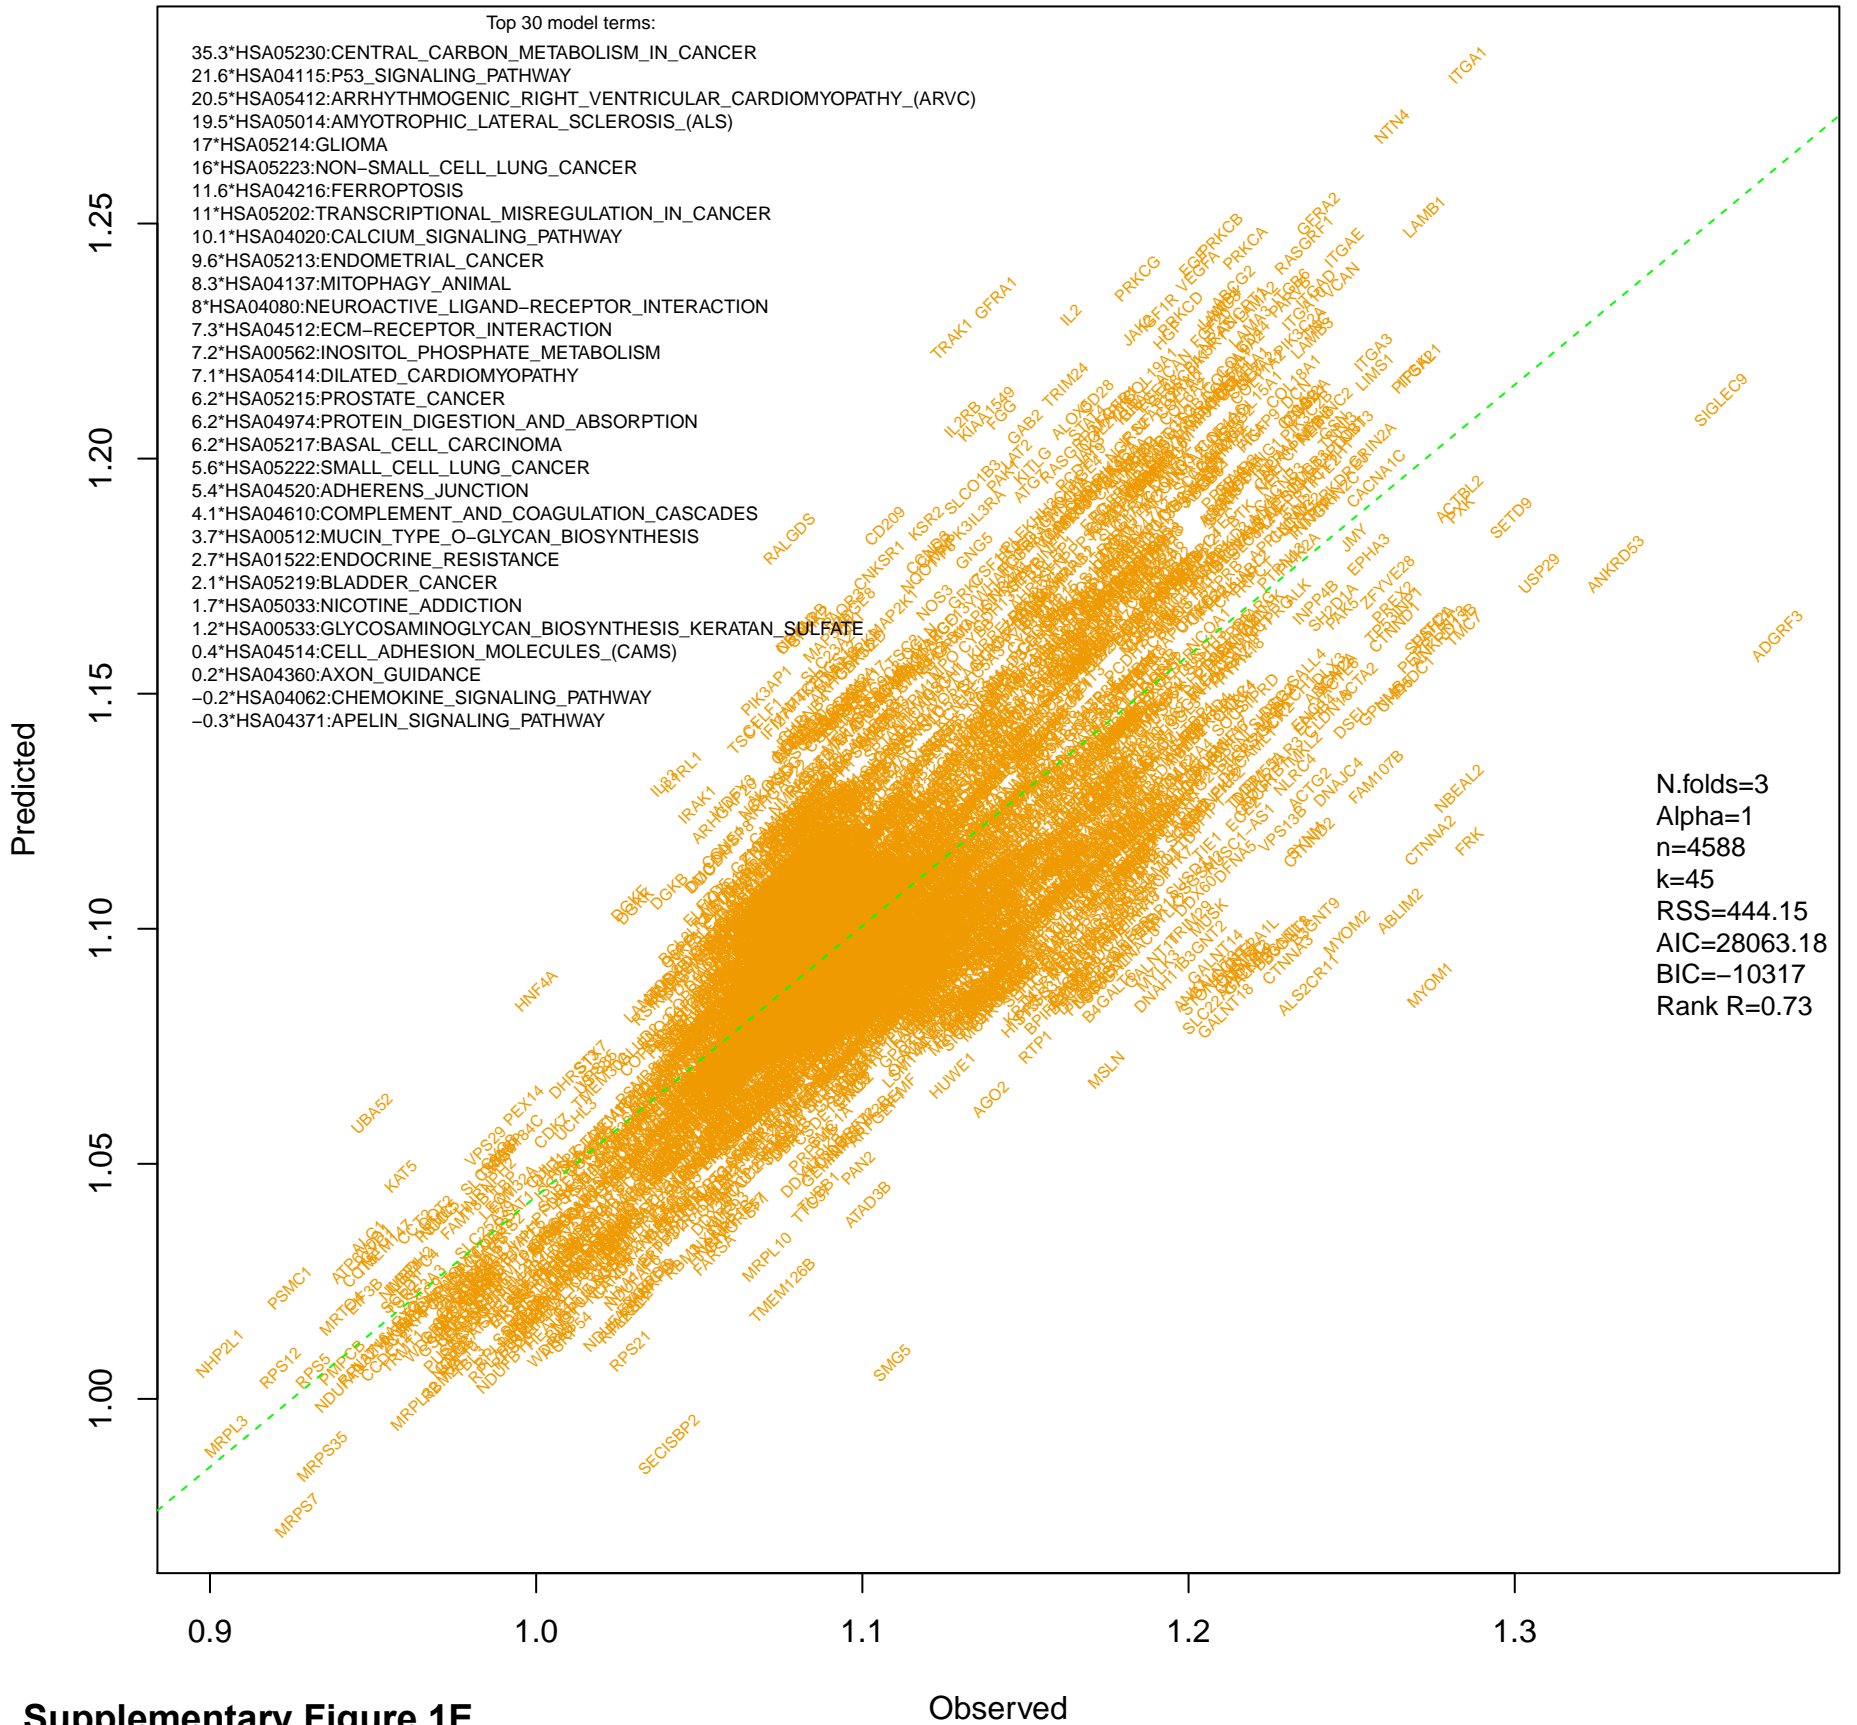

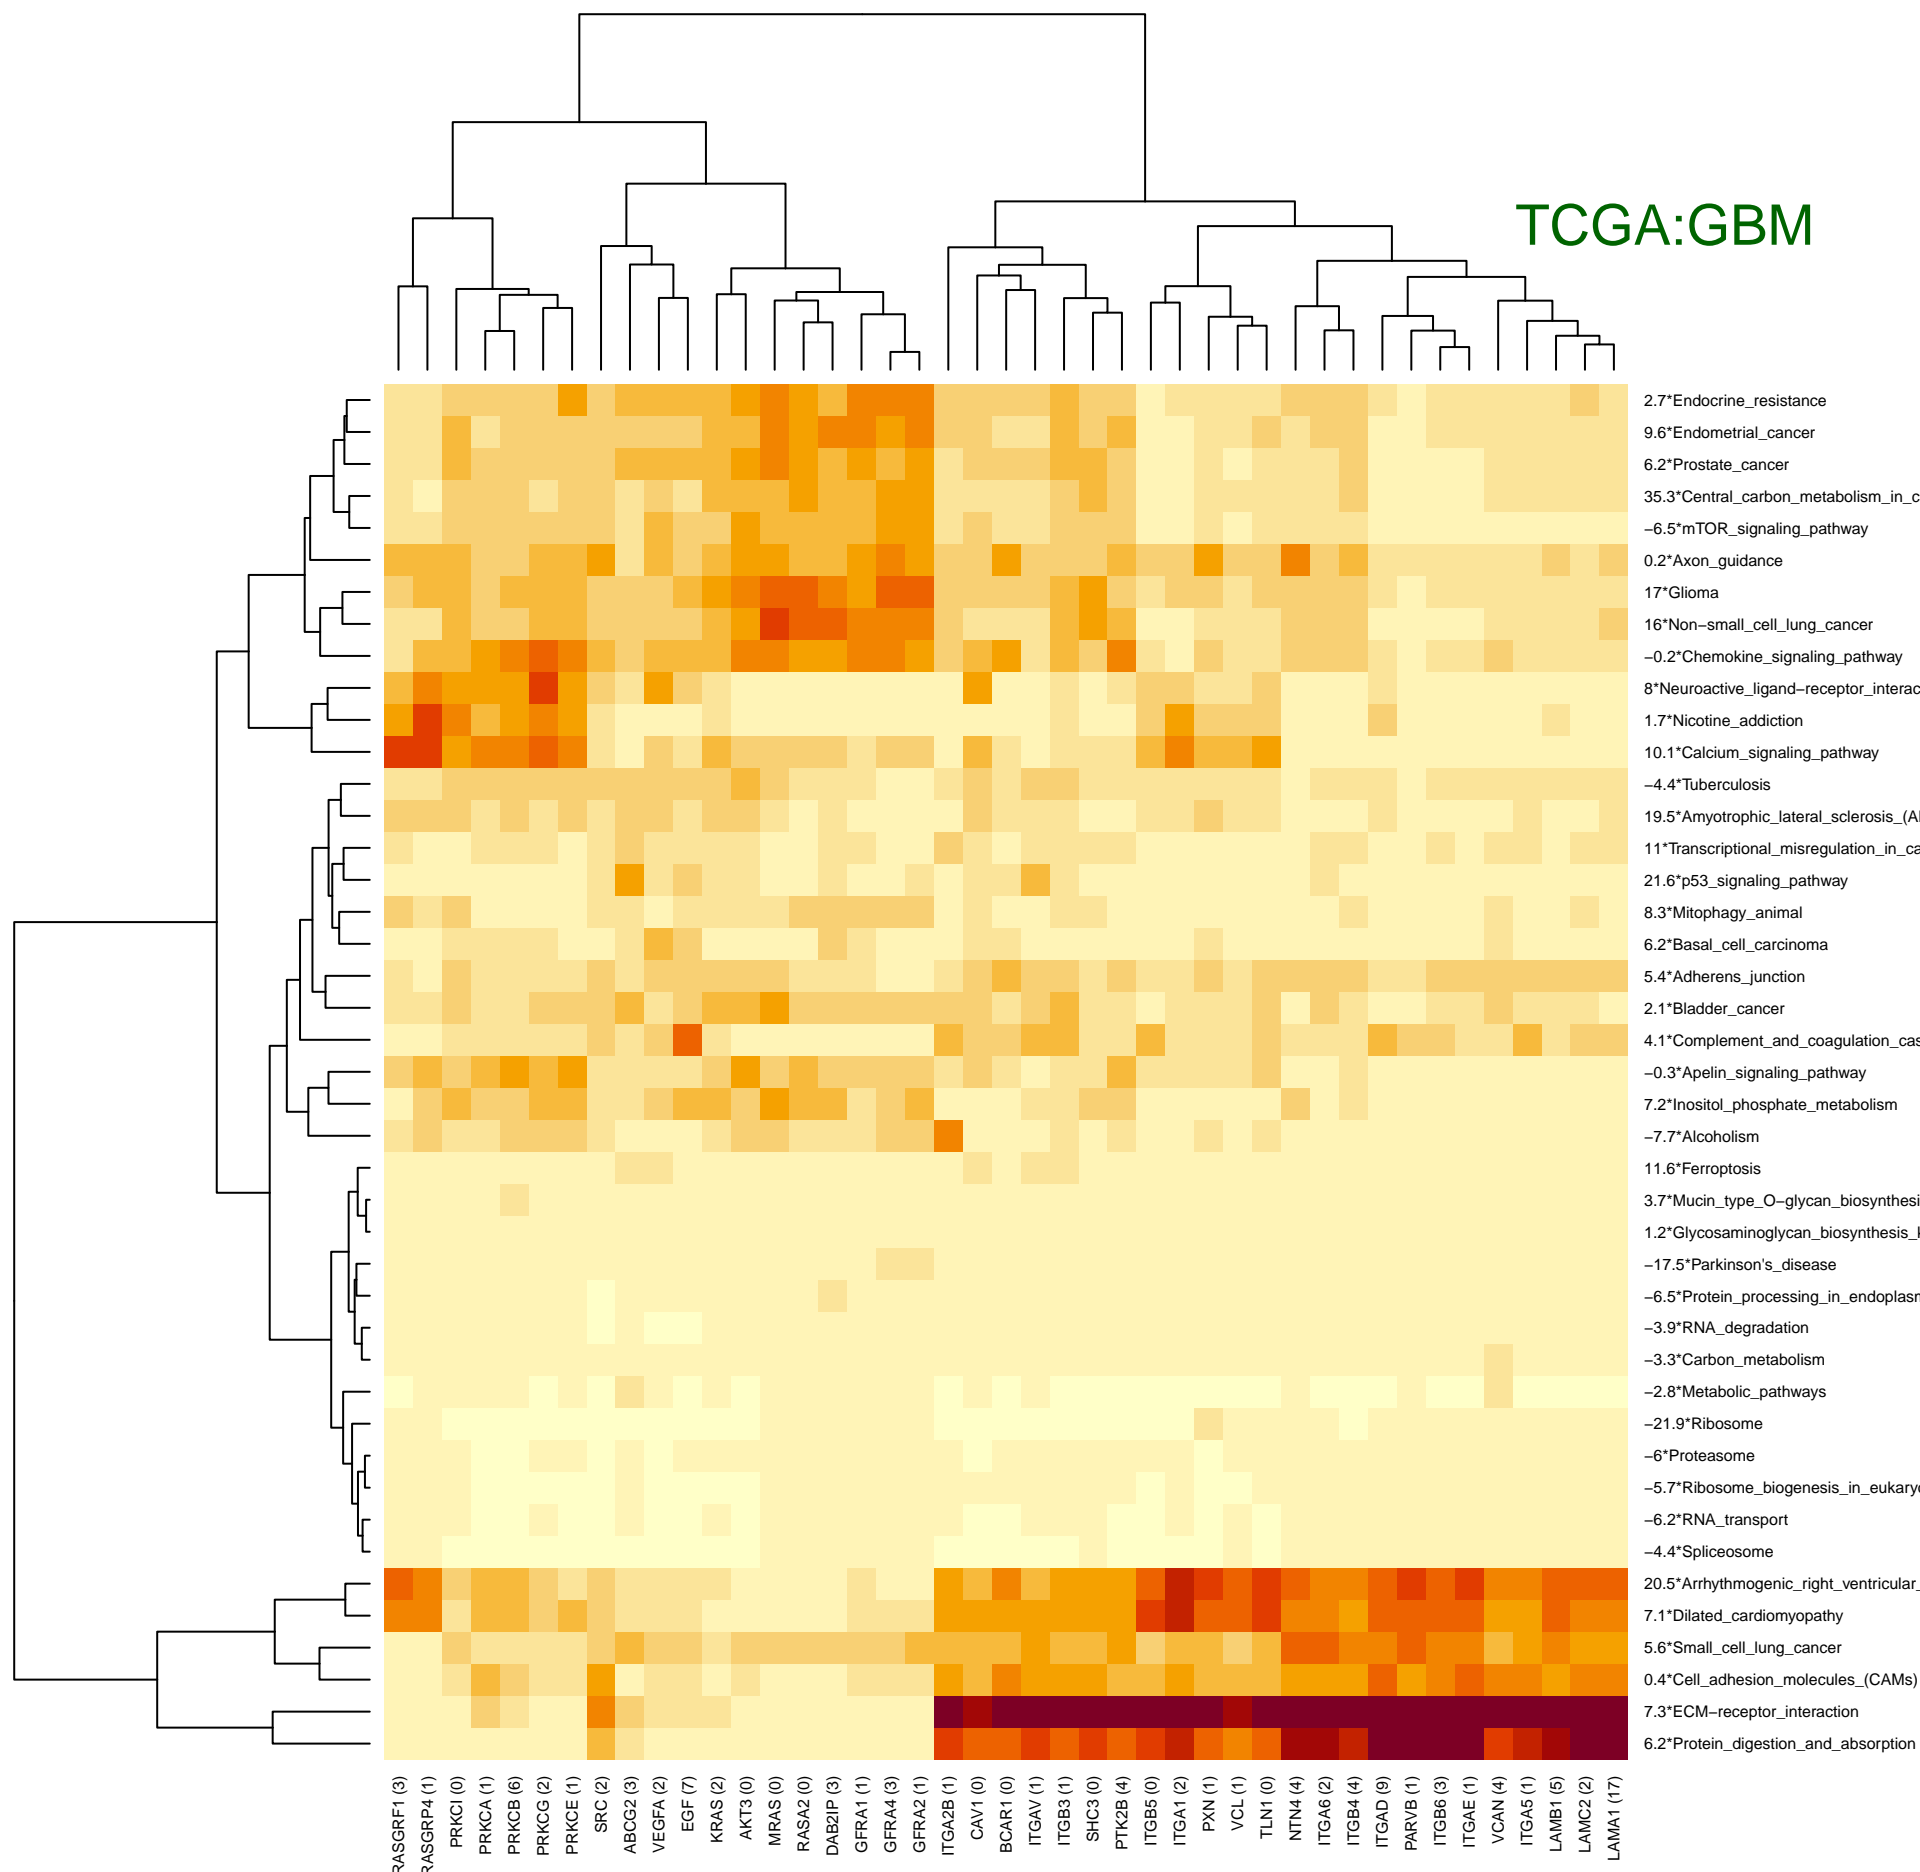

Supplementary Figure 1F

# TCGA:LUAD, test set

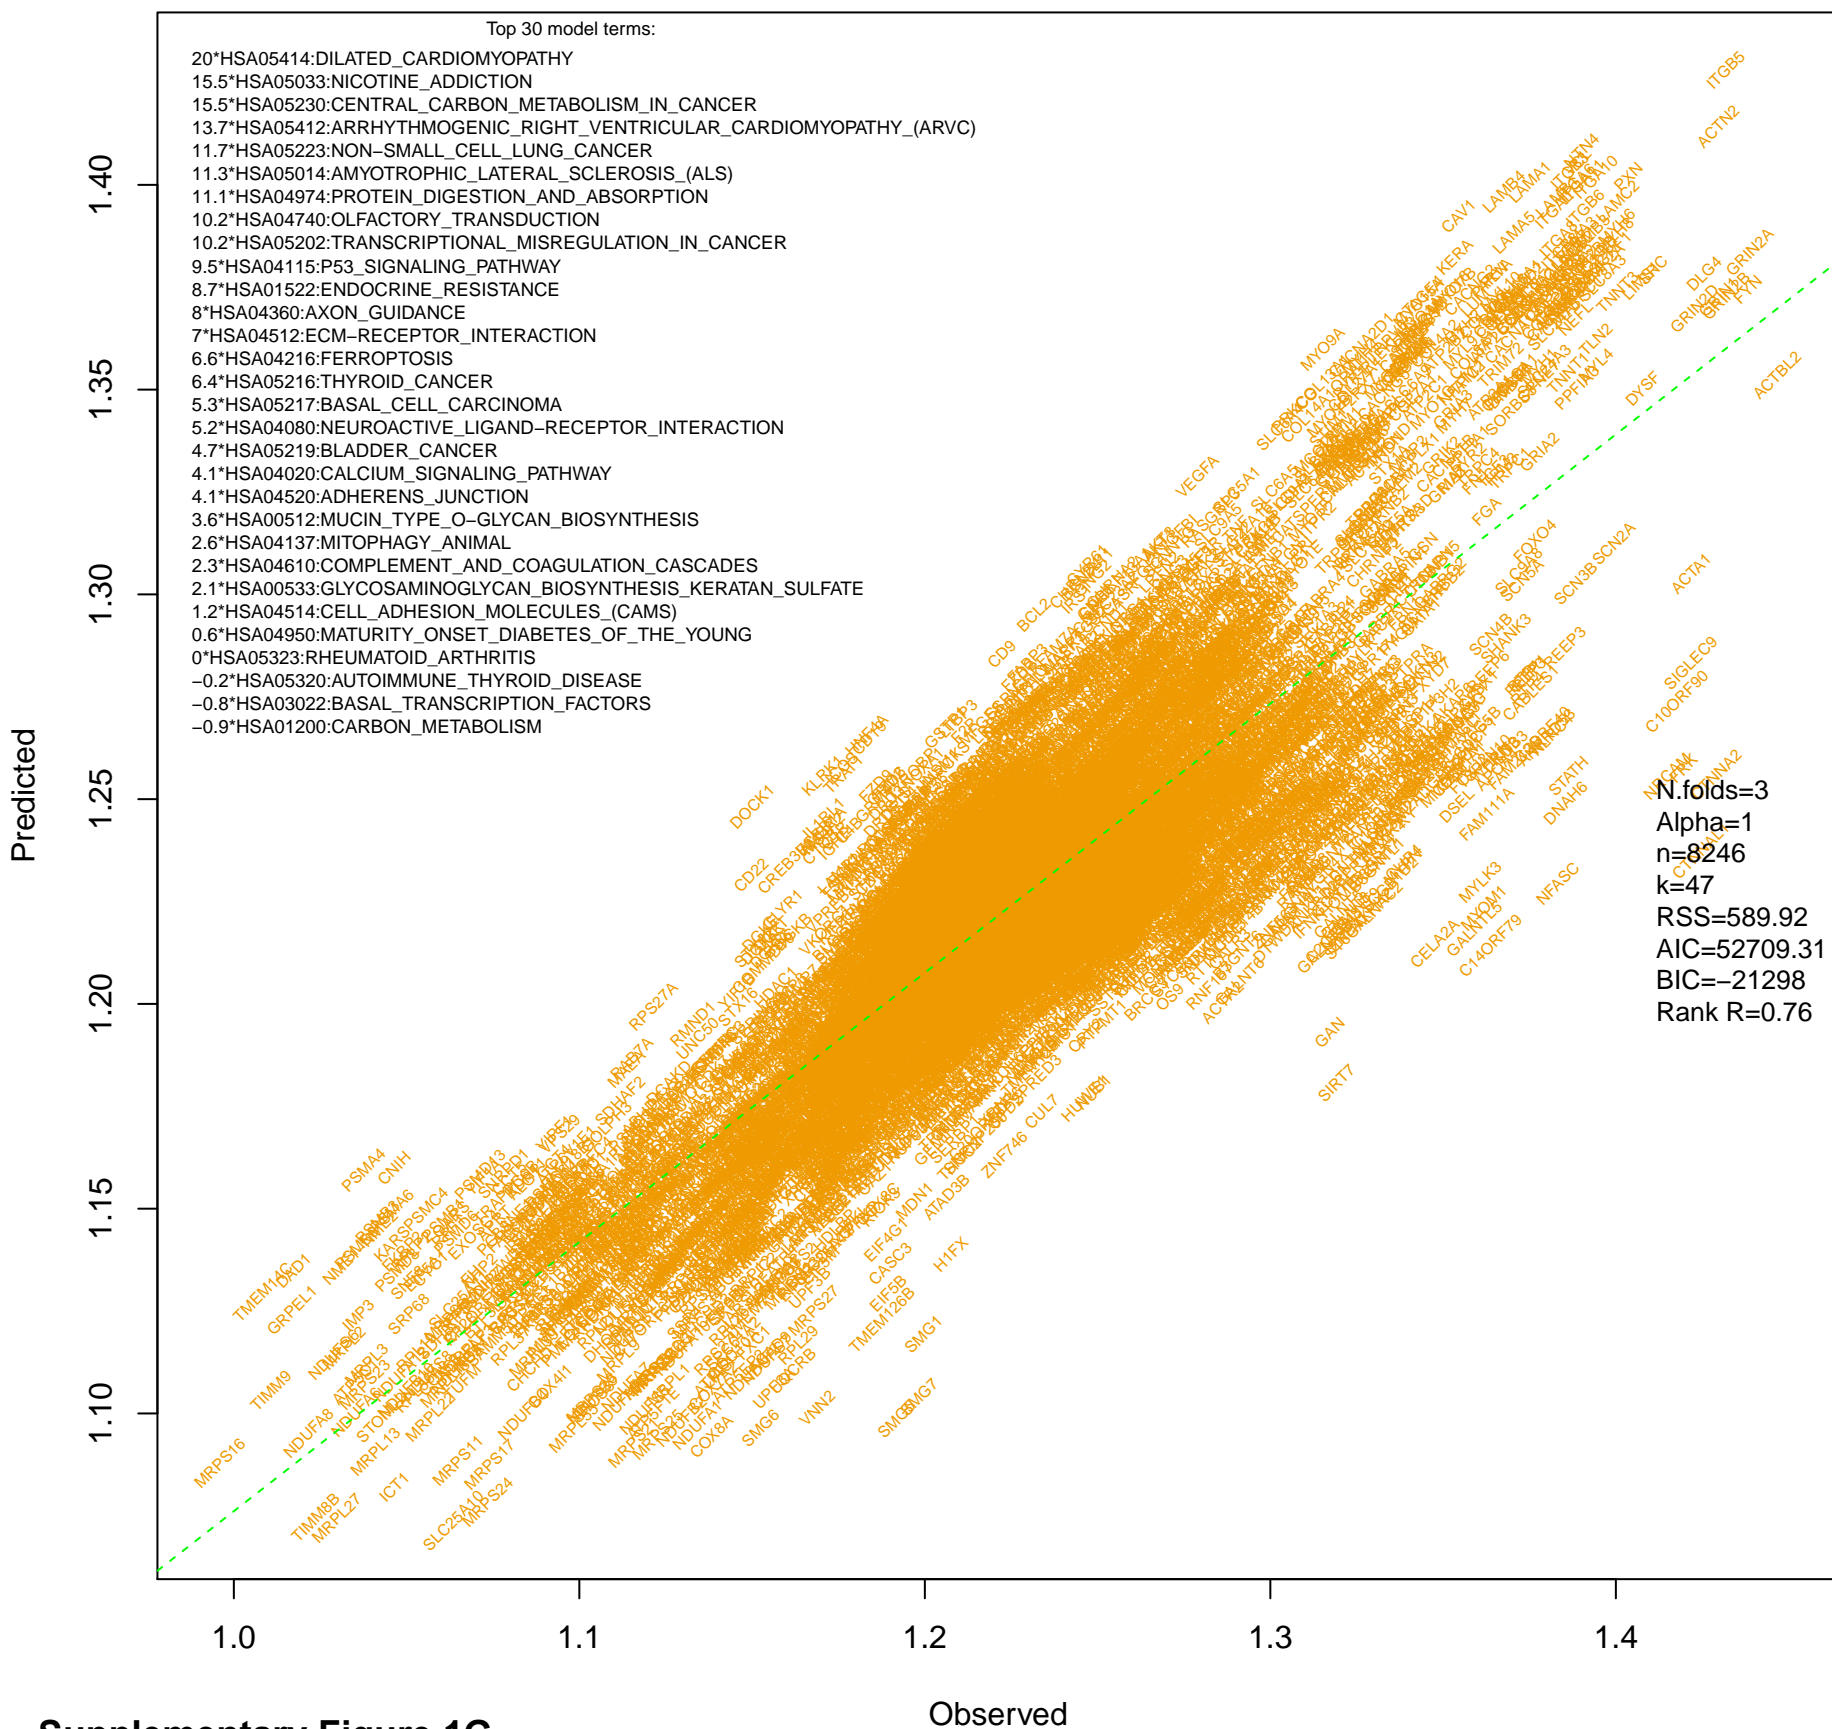

TCGA:LUAD

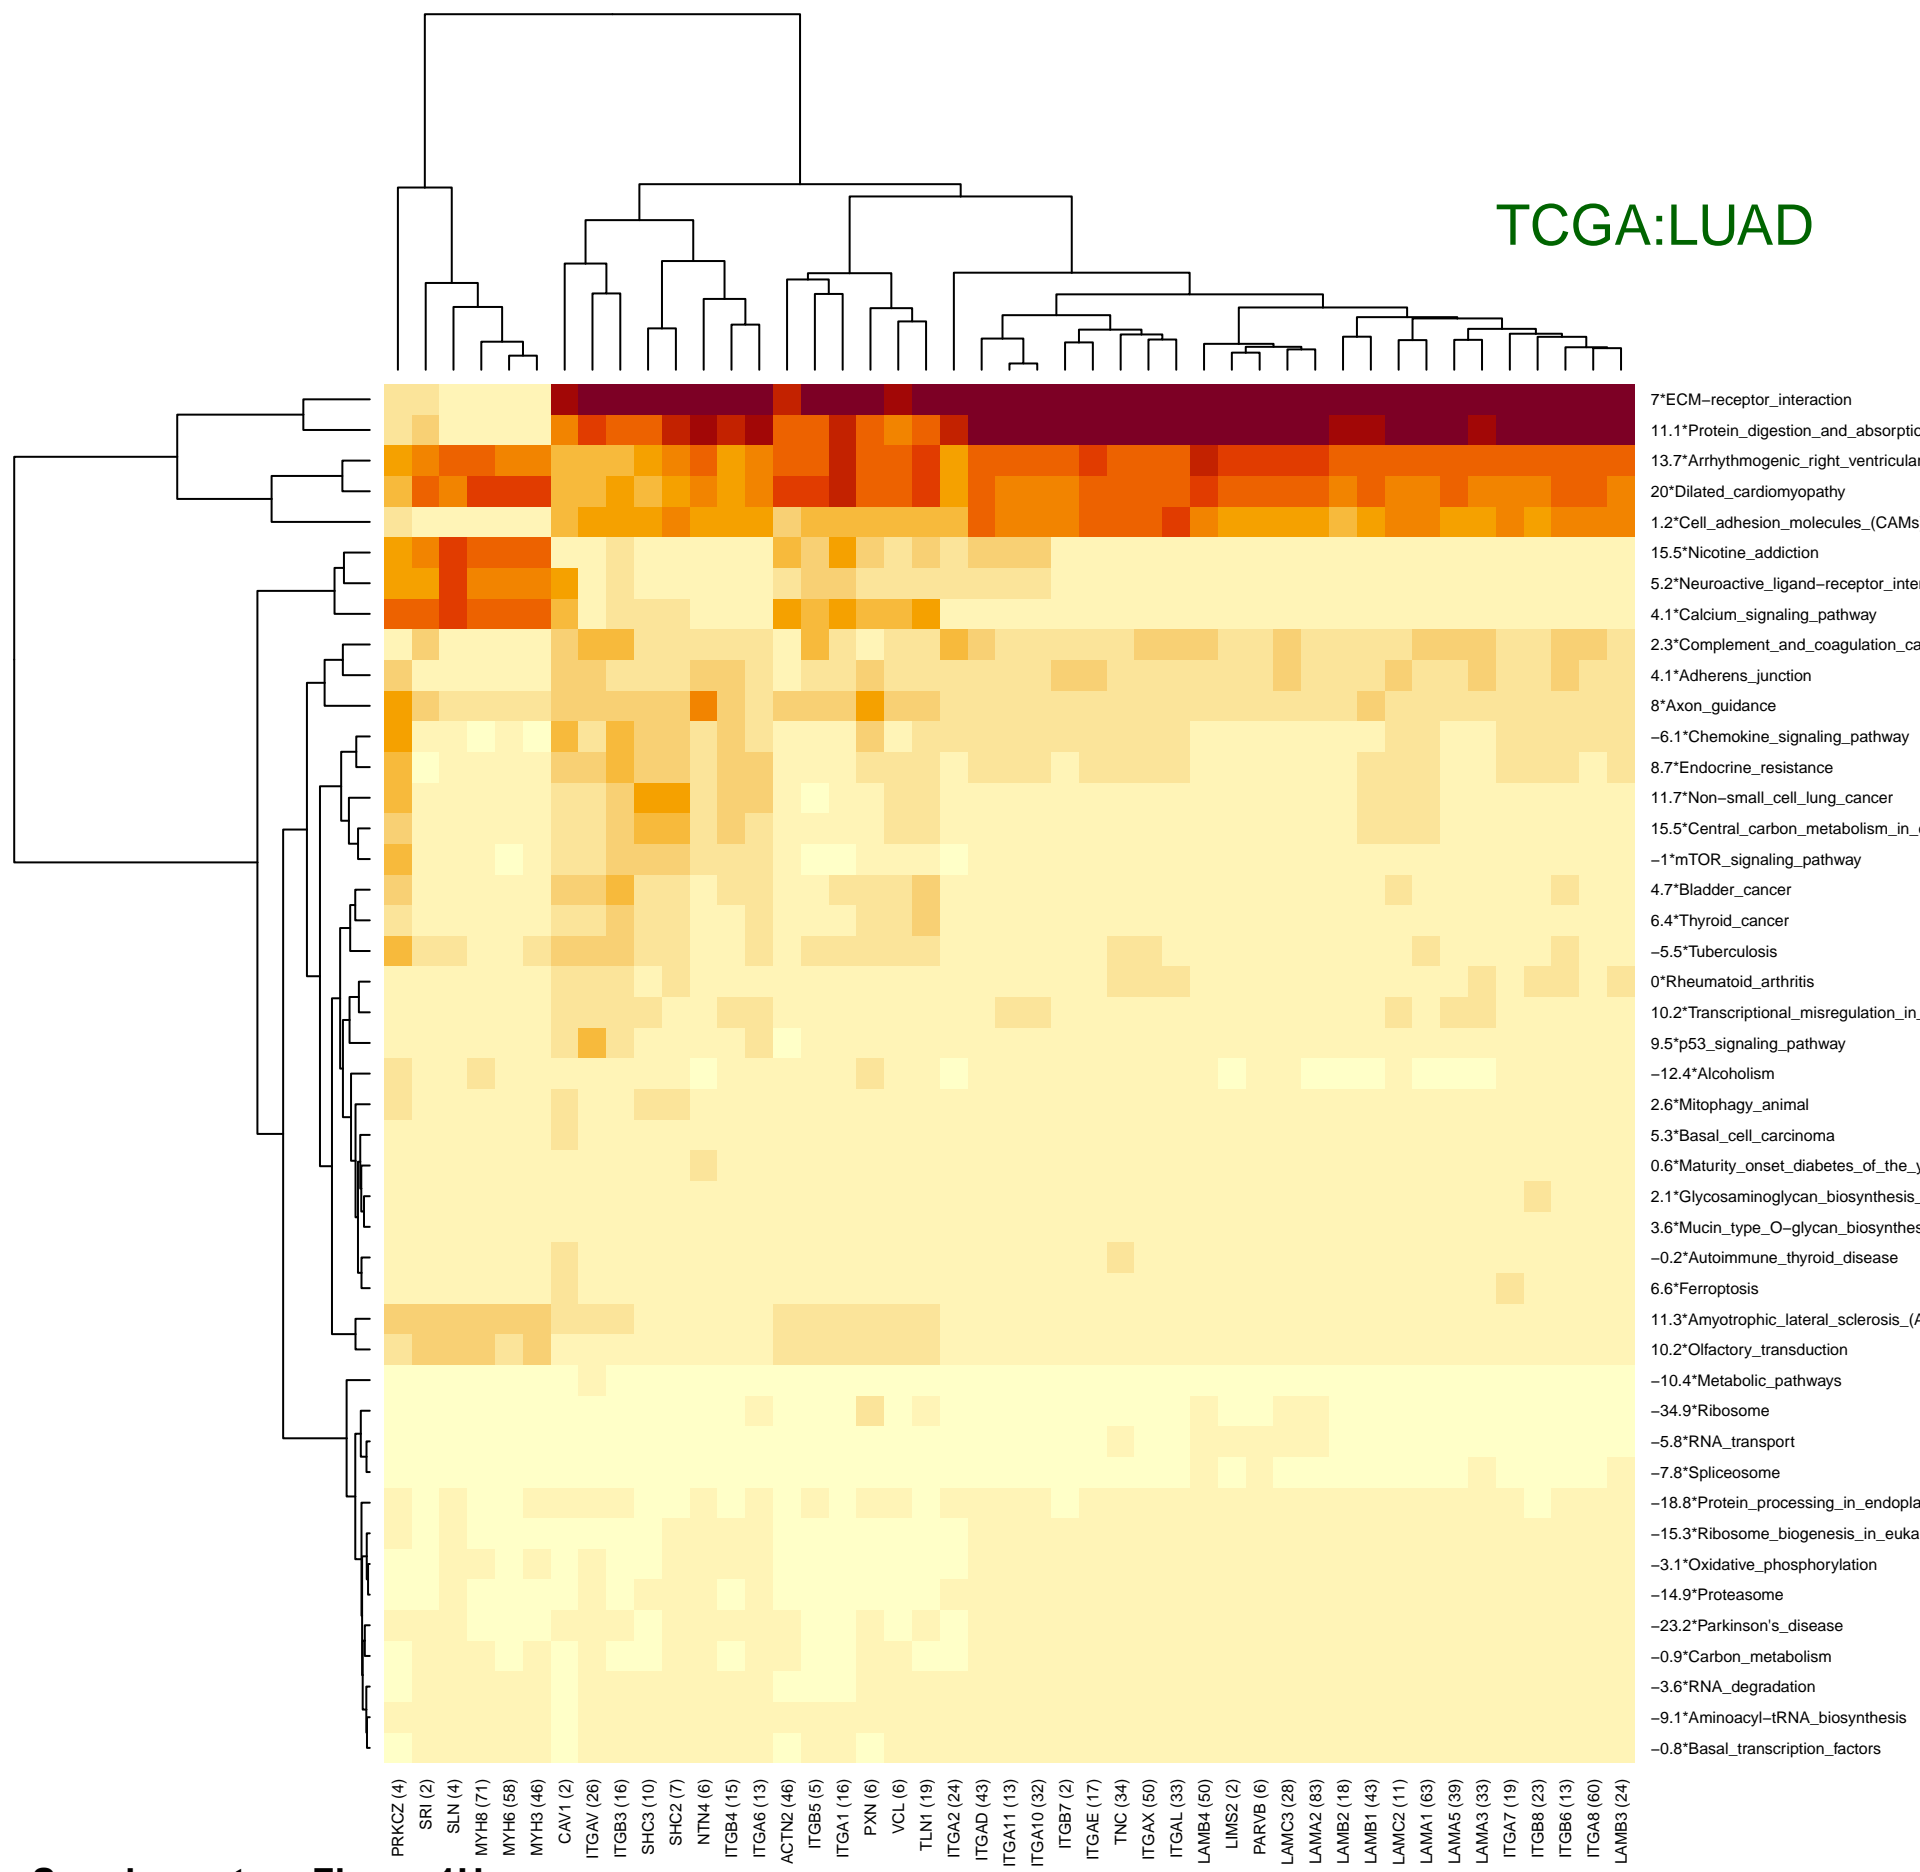

Supplementary Figure 1H



# TCGA:LUSC, test set

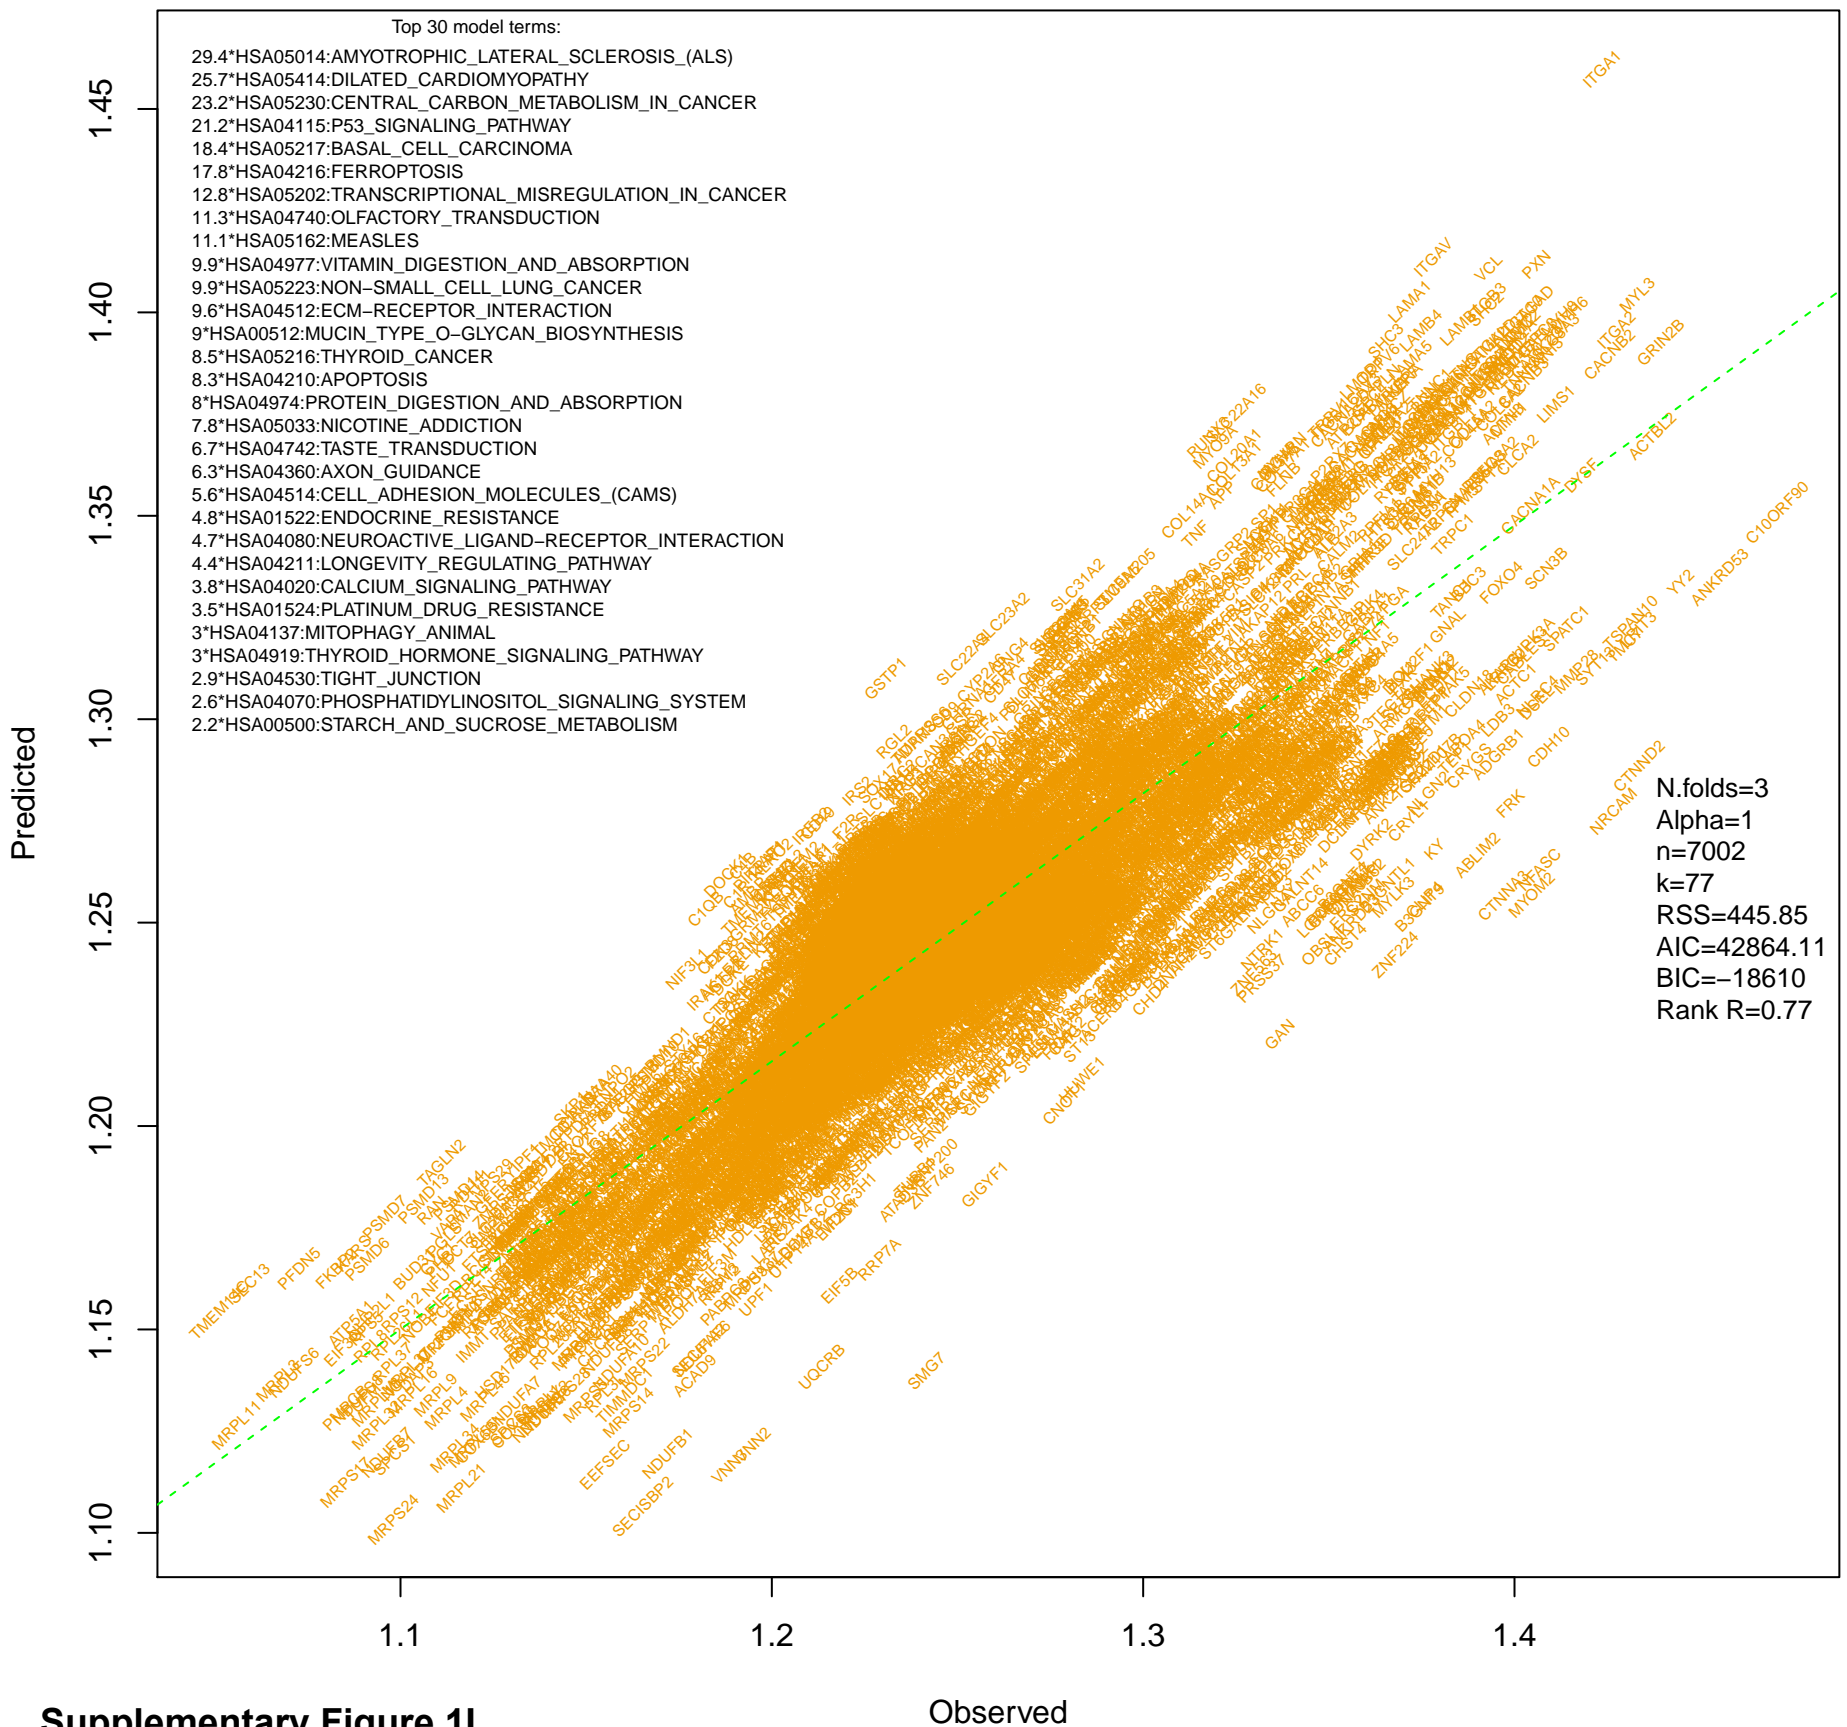

Supplementary Figure 11

TCGA:LUSC

Supplementary Figure 1J

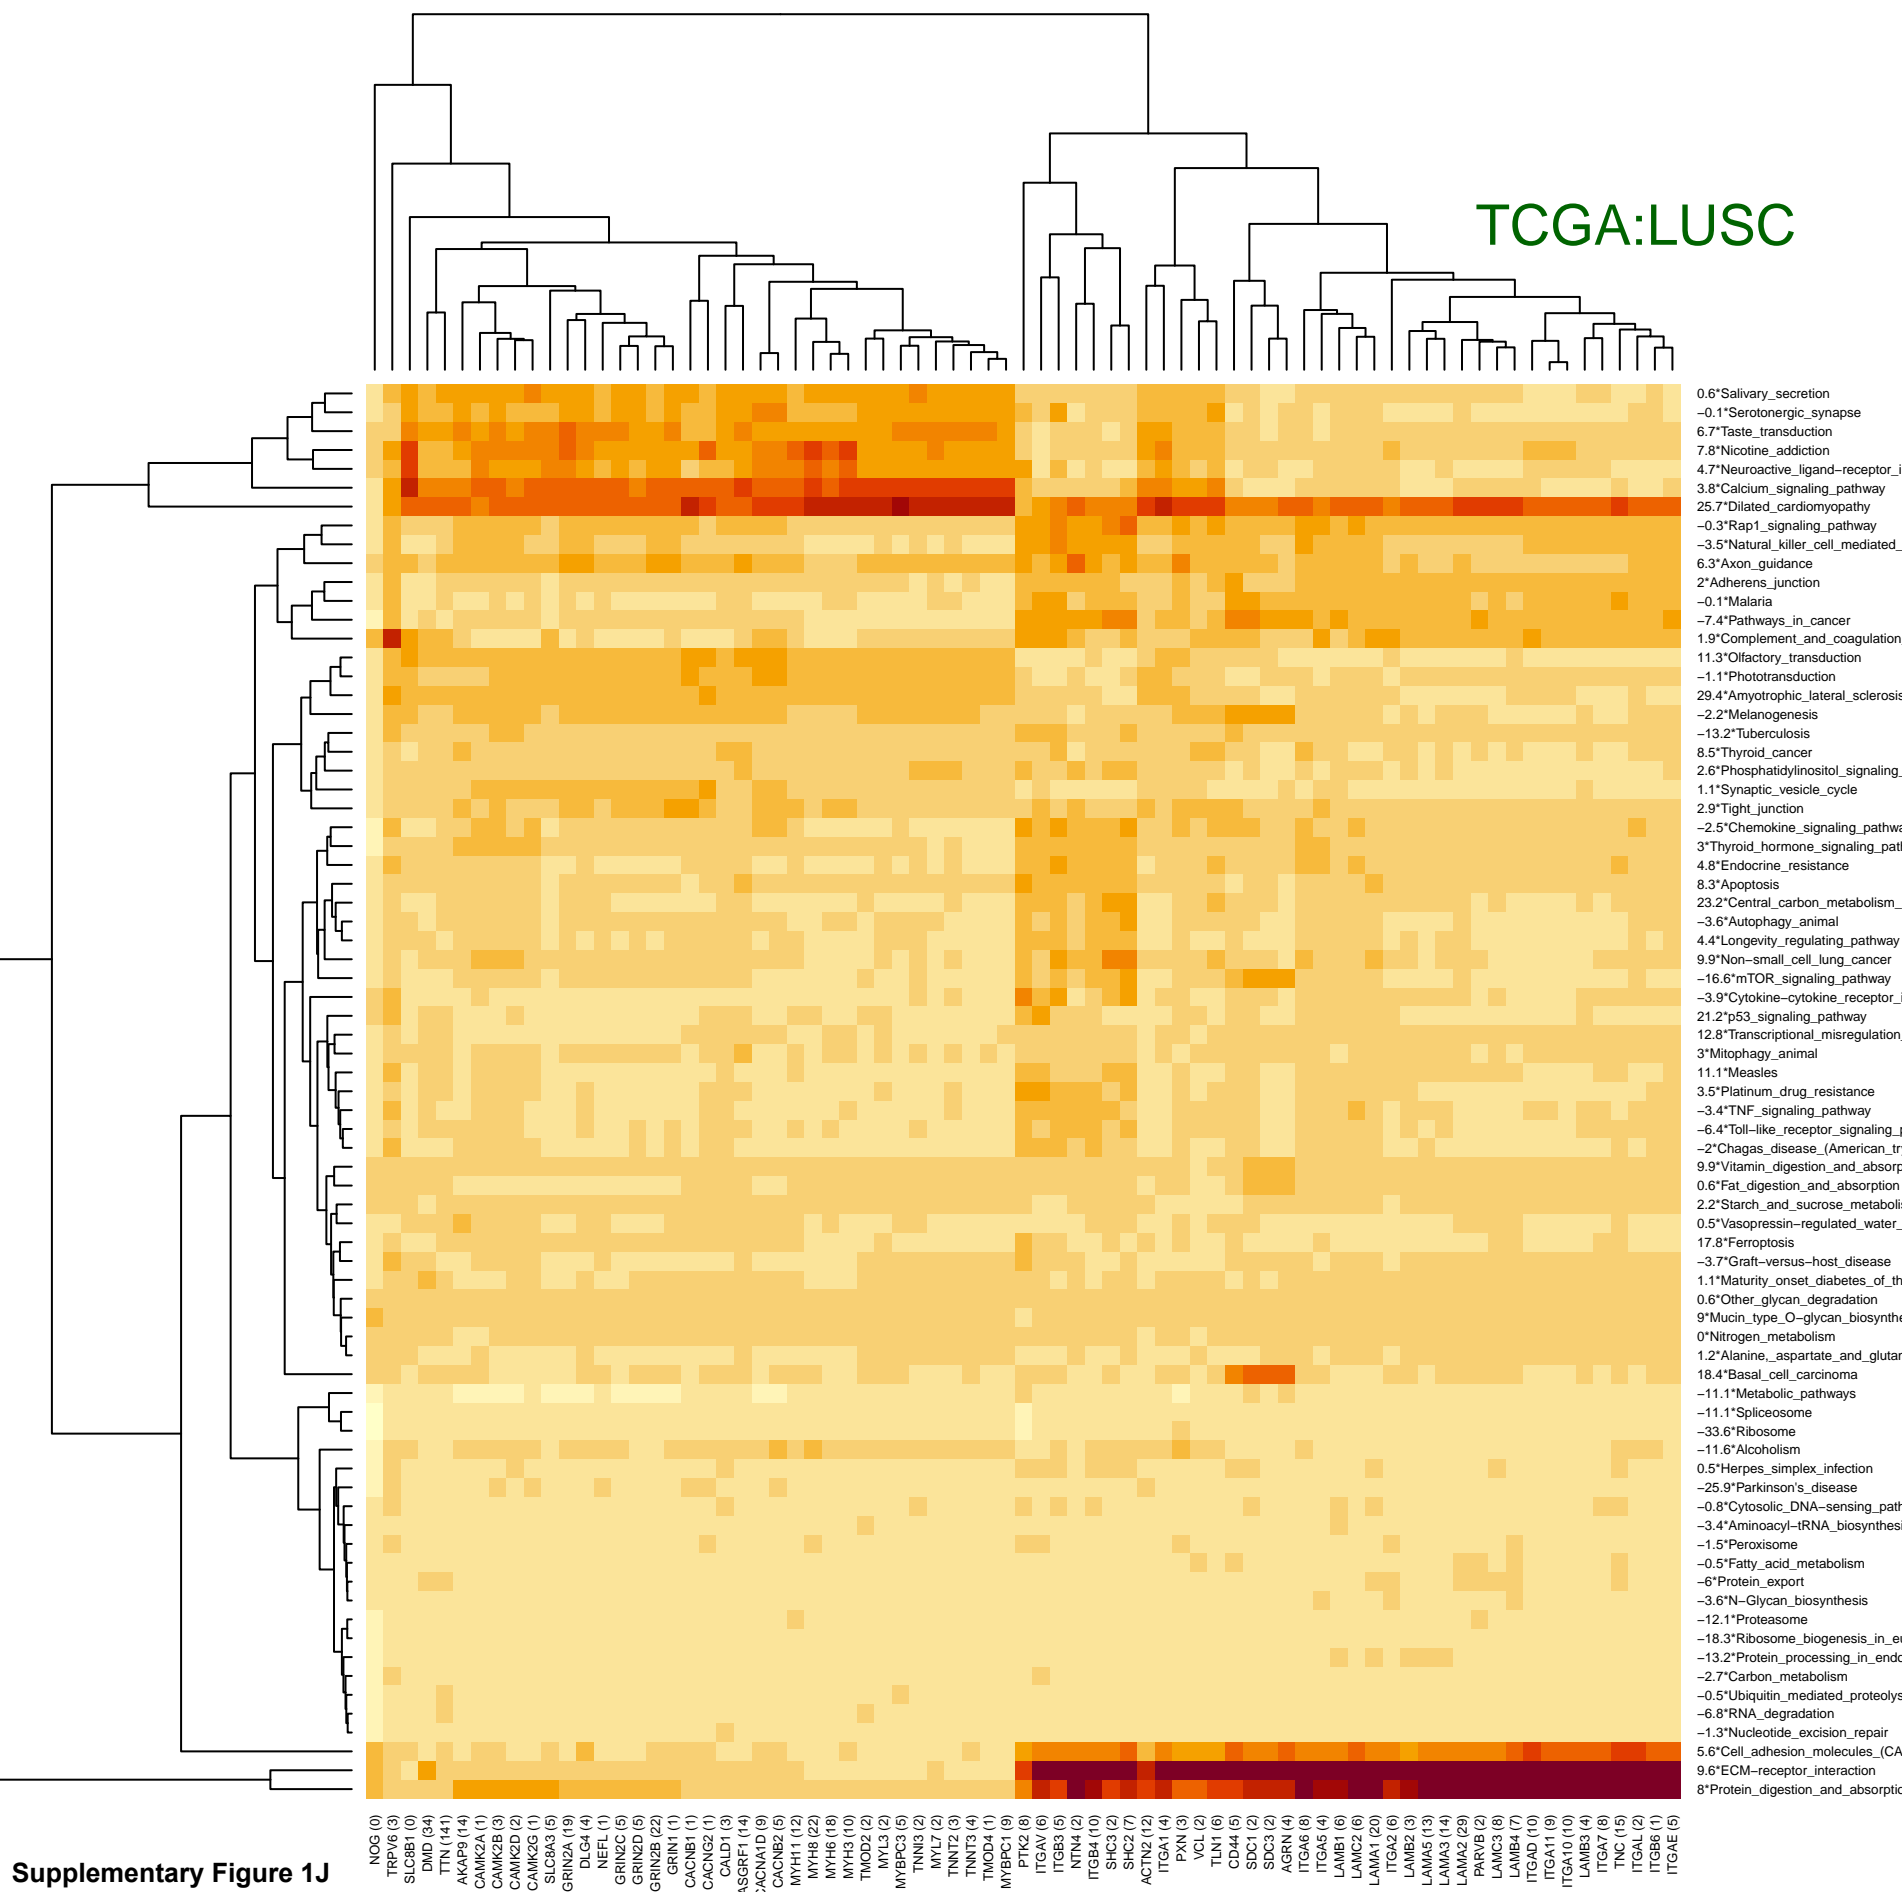

# TCGA:OV, test set

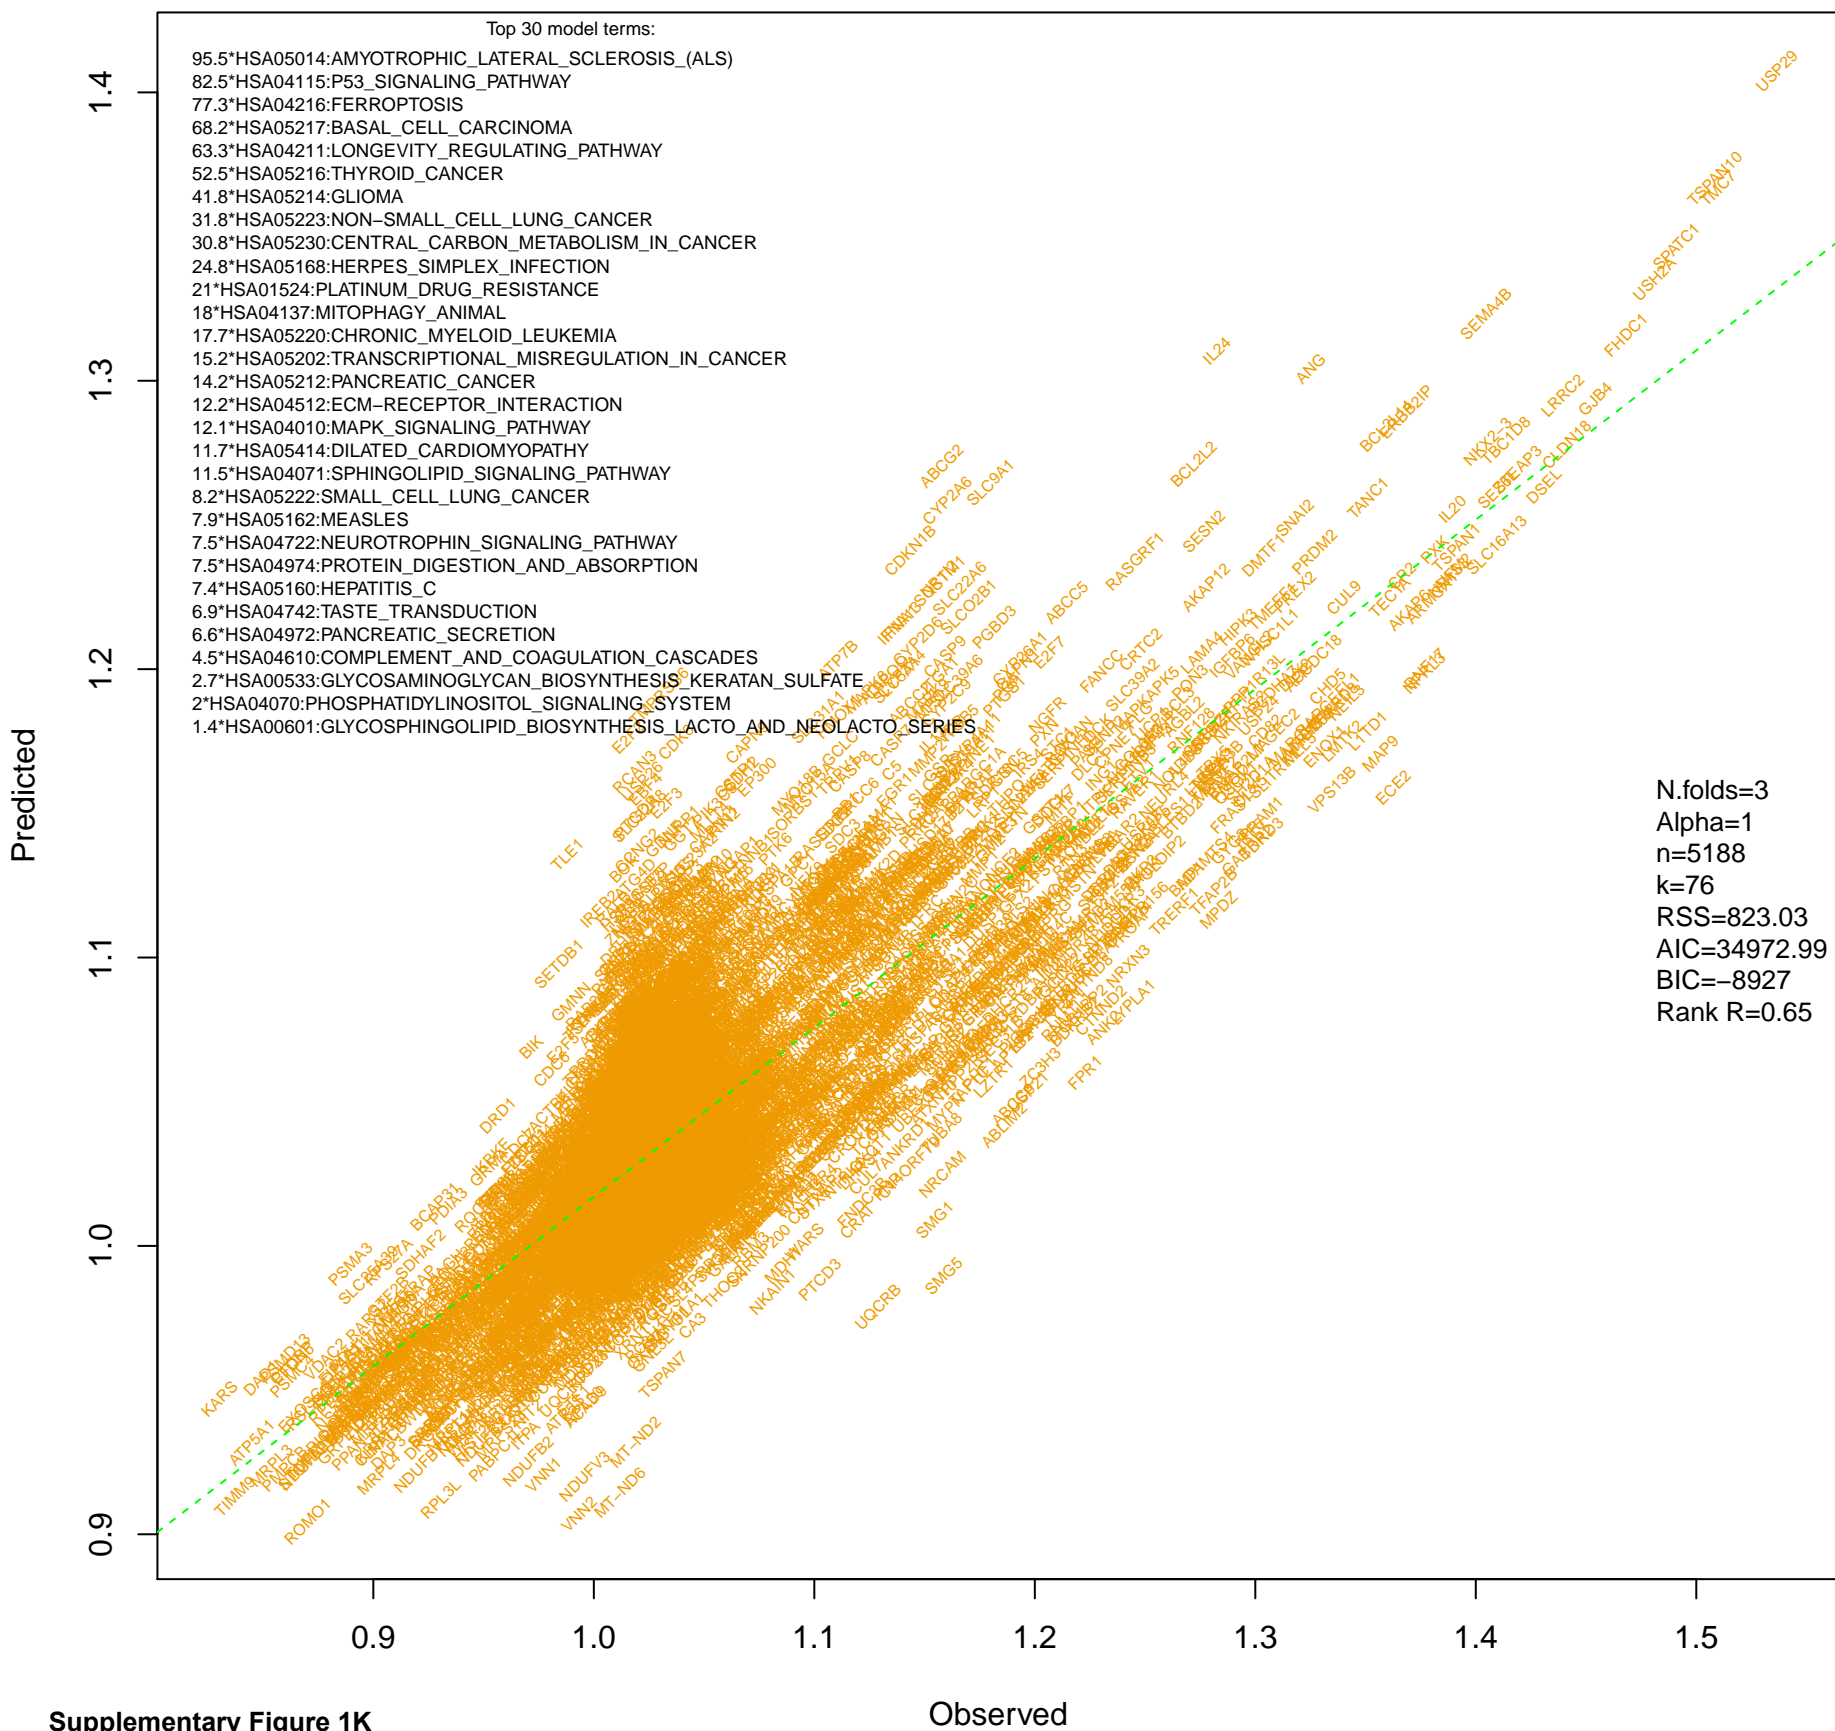

Supplementary Figure 1K

TCGA:OV

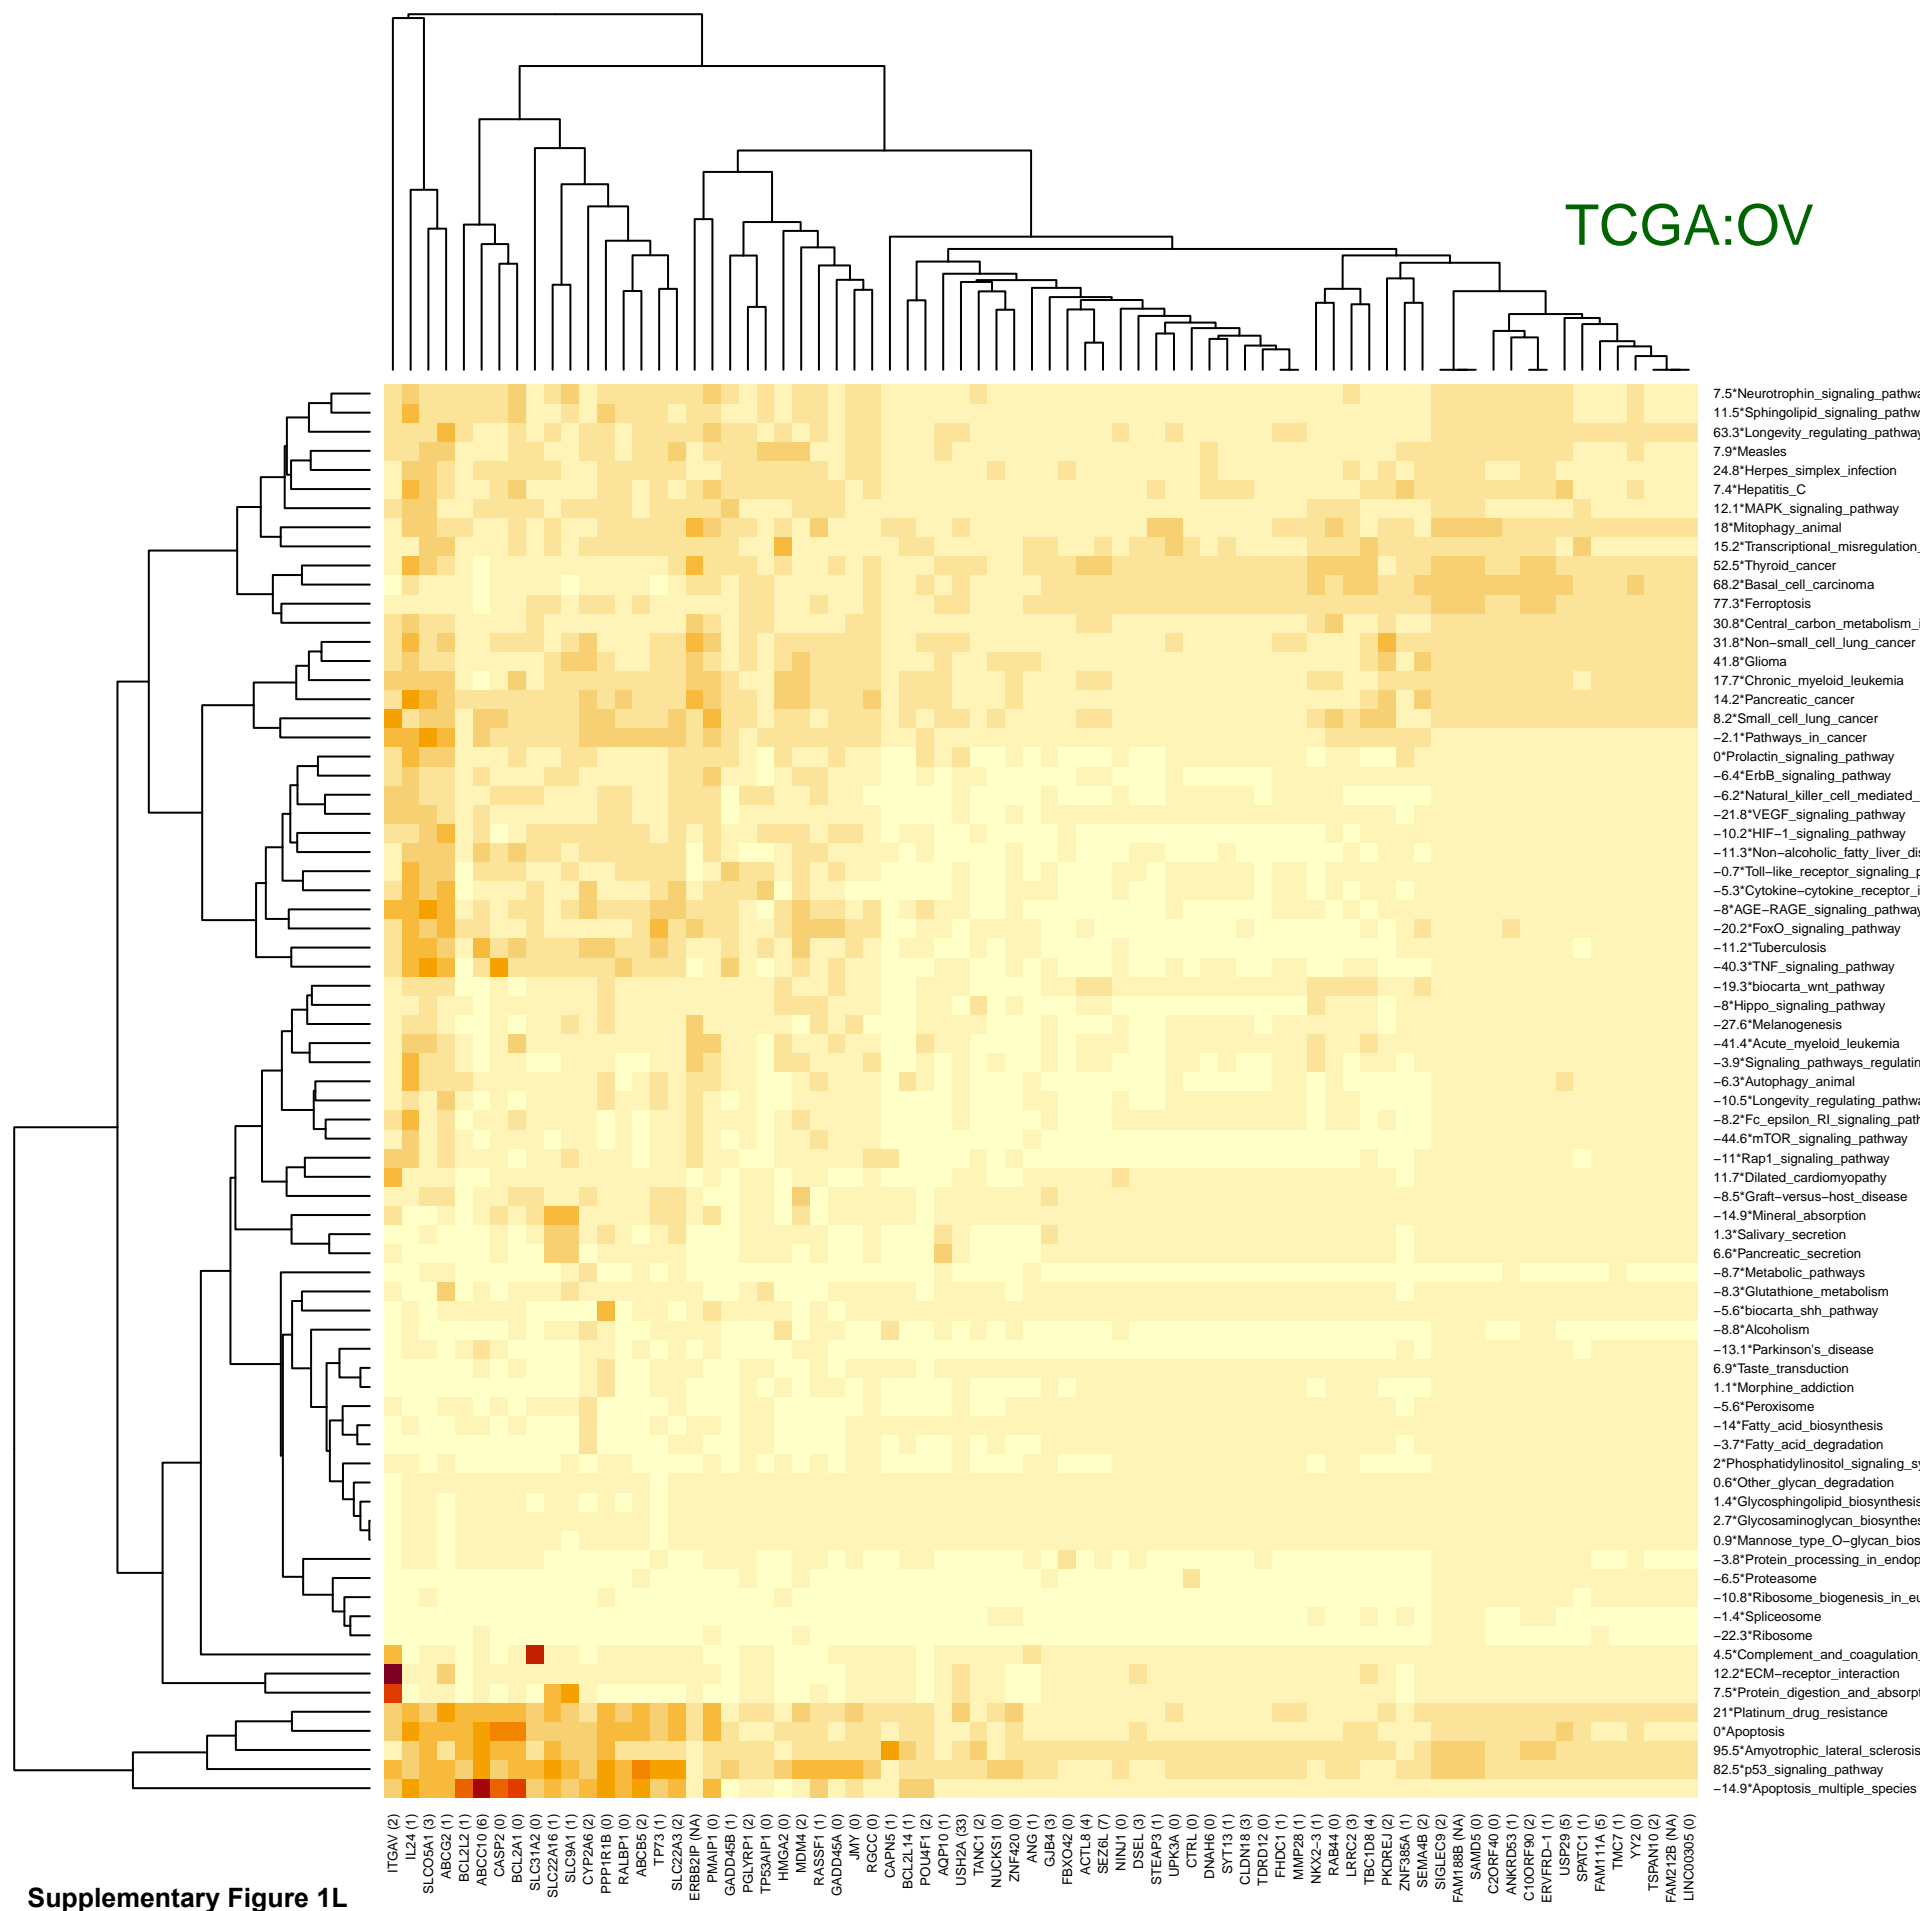

Supplementary Figure 1L



TCGA:PAAD, test set

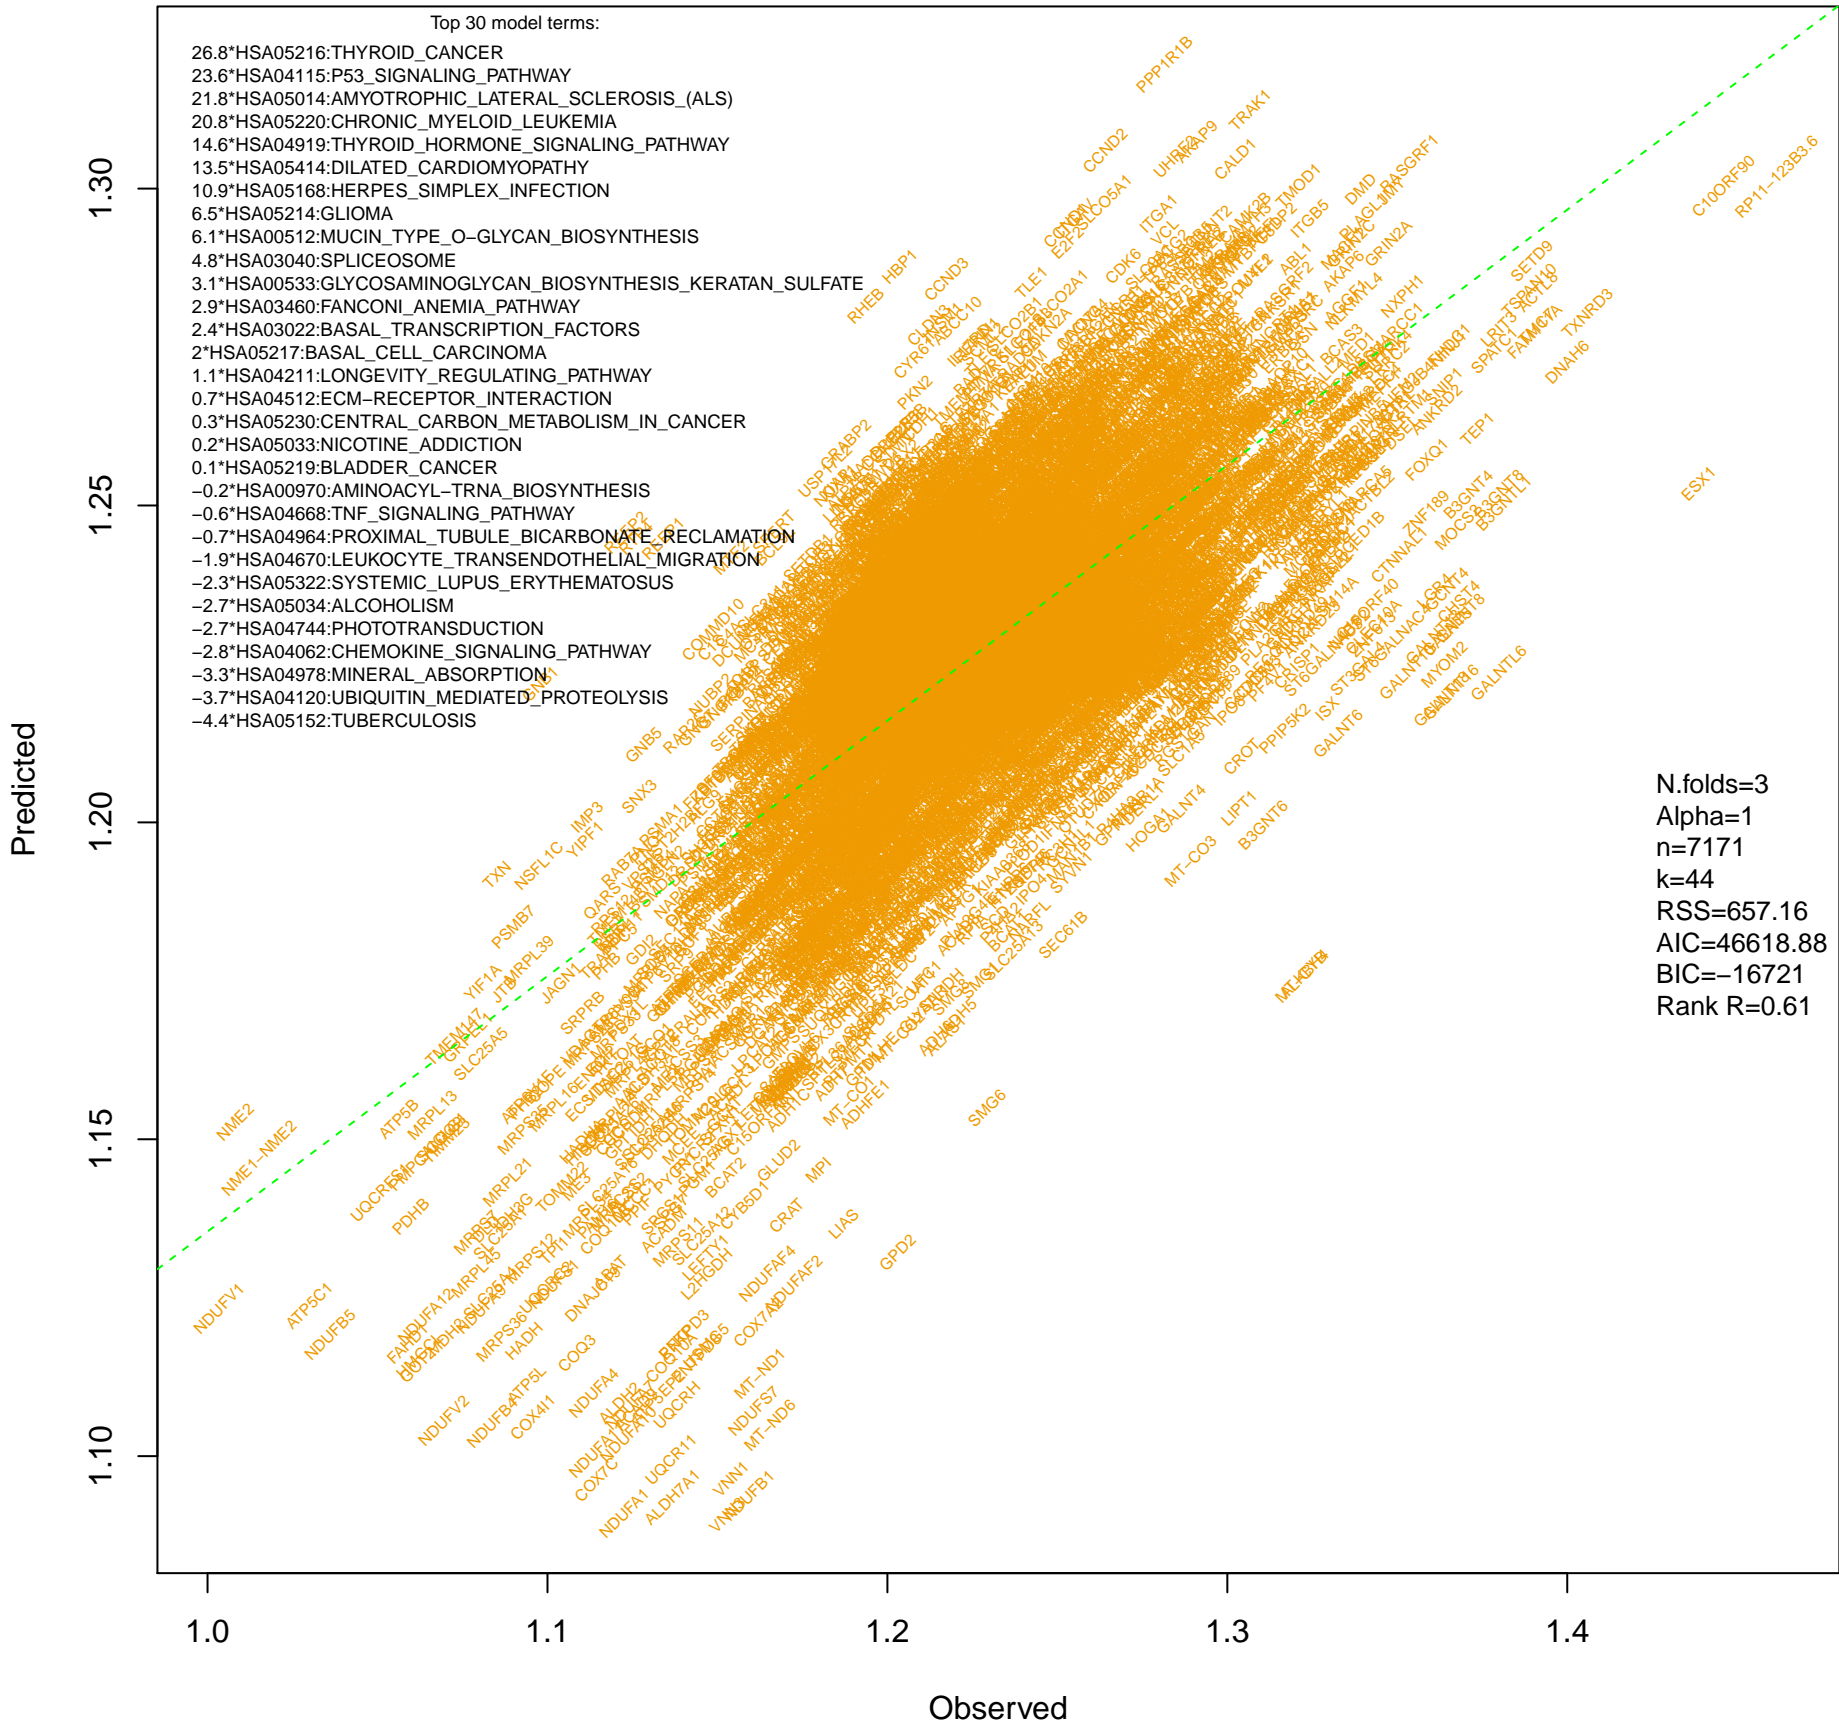

Supplementary Figure 1M



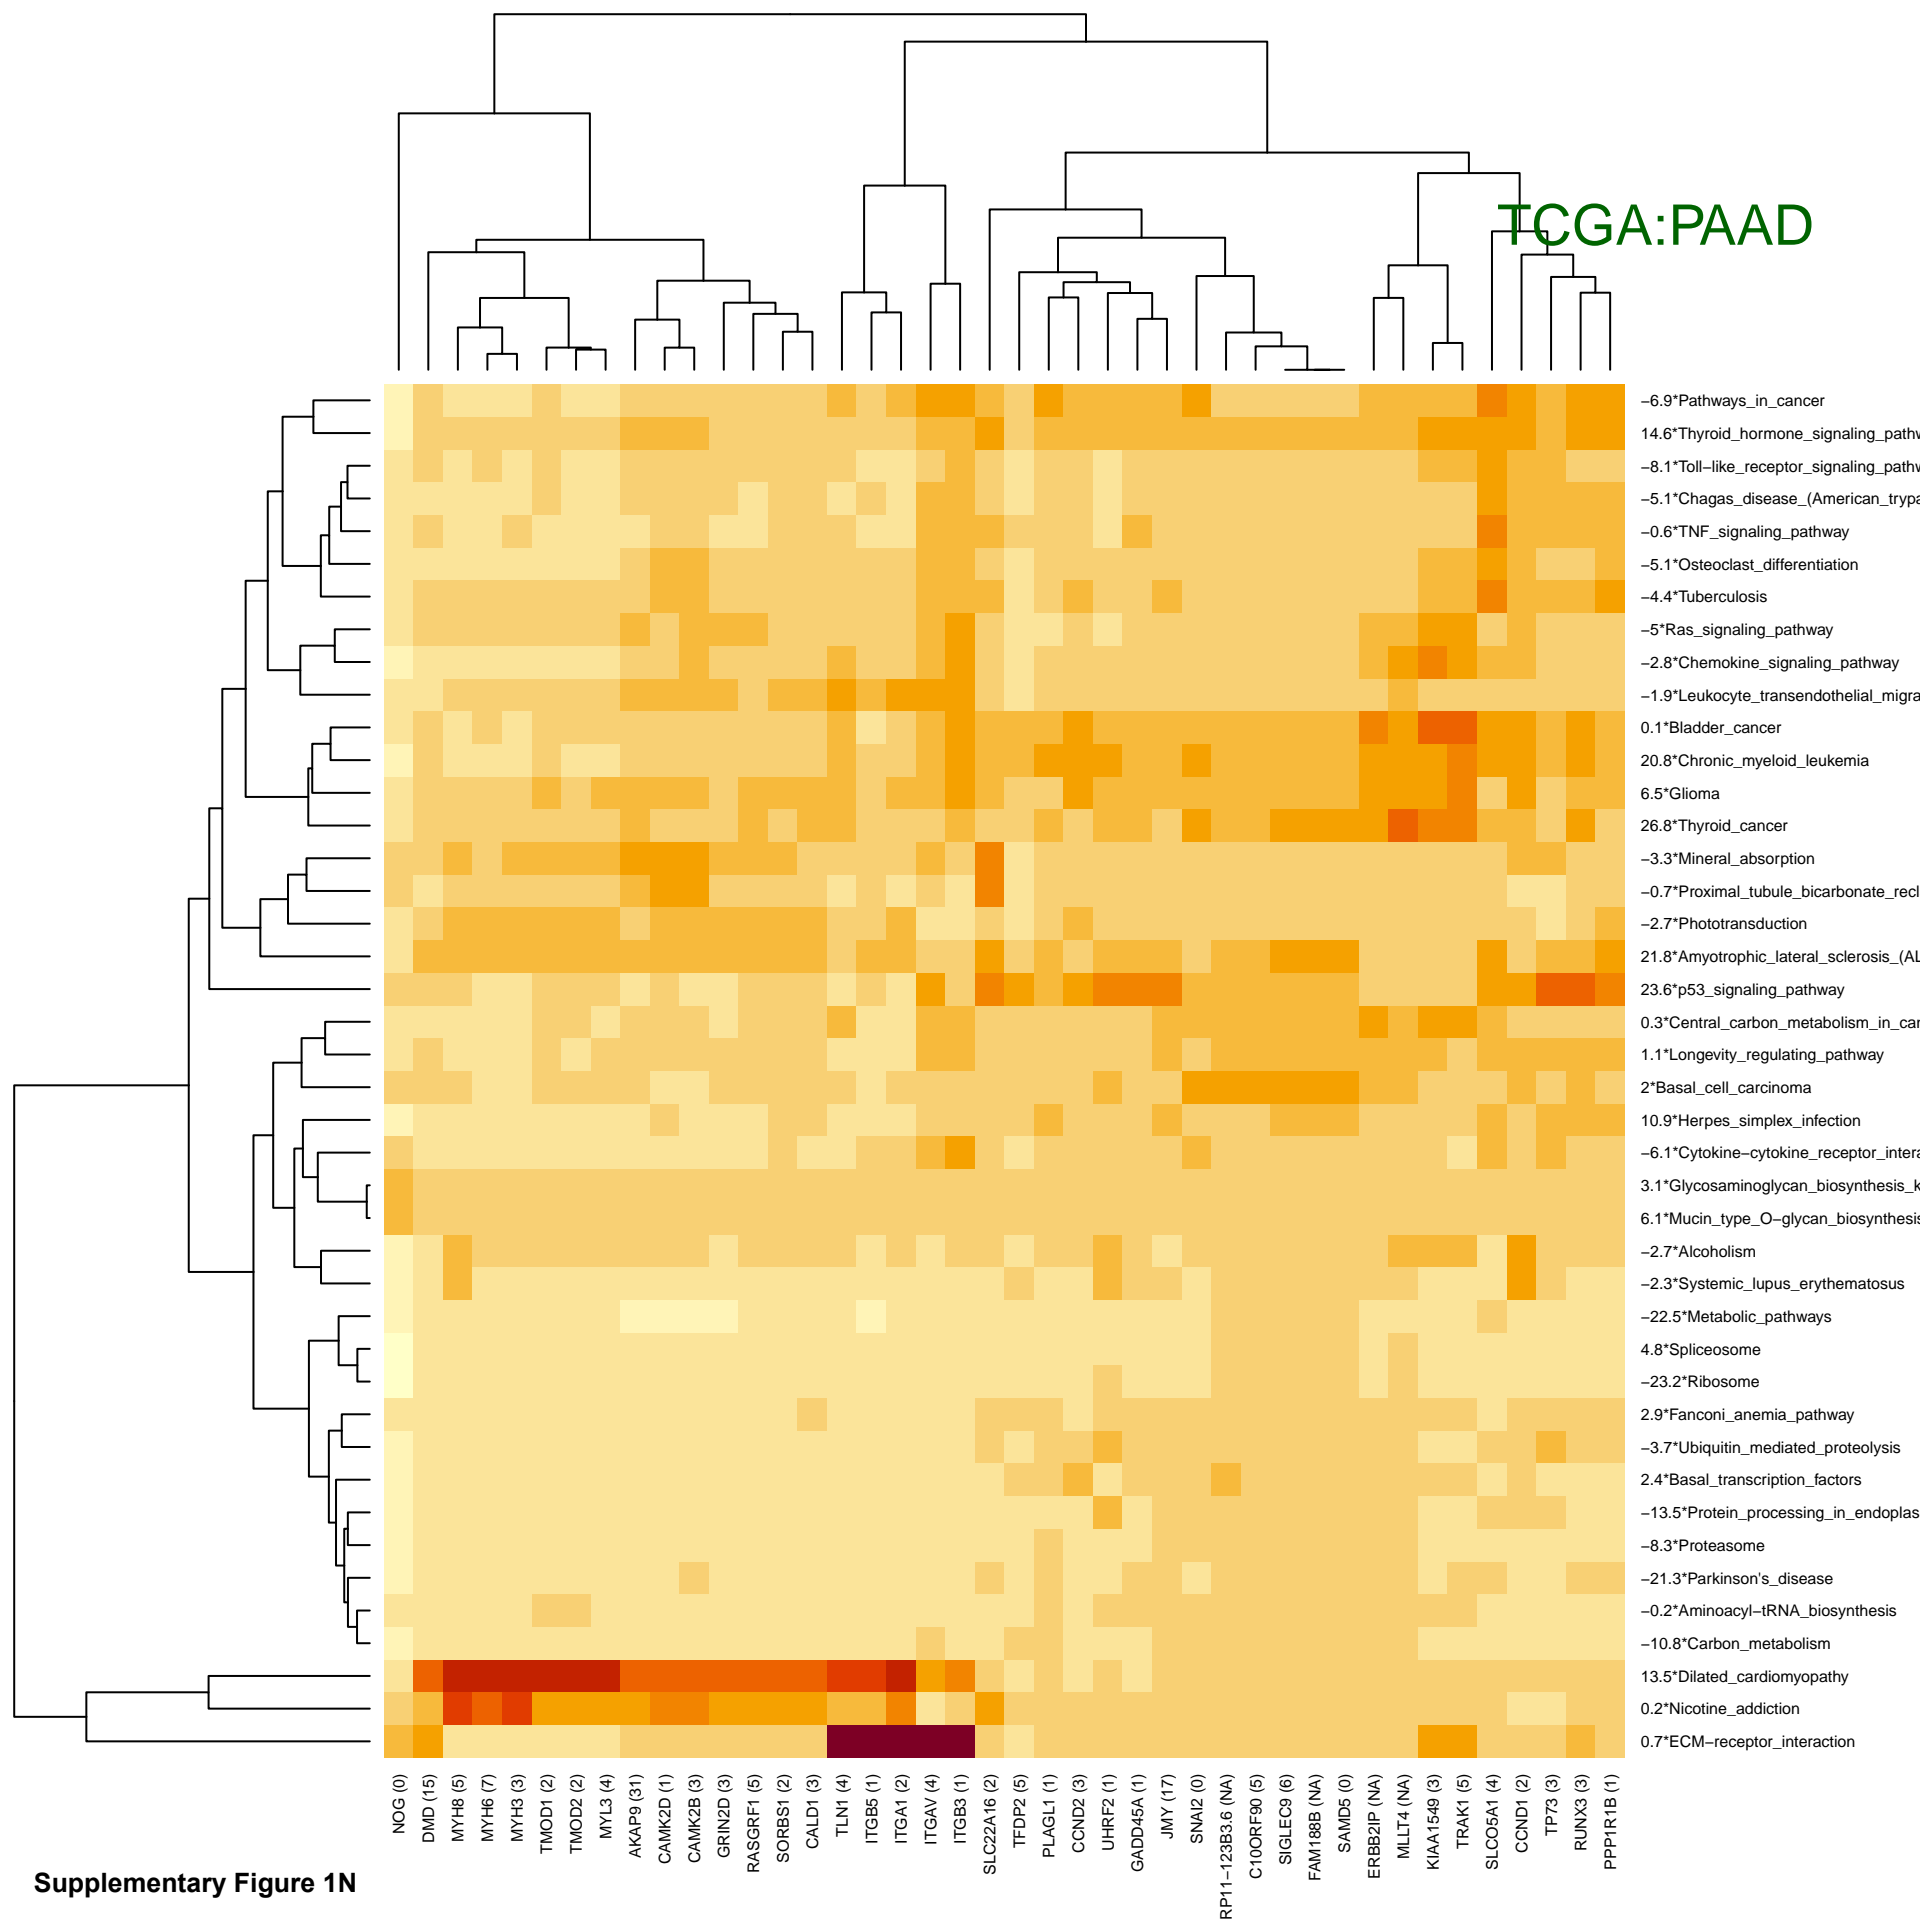

Supplementary Figure 1N

# TCGA:PRAD, test set

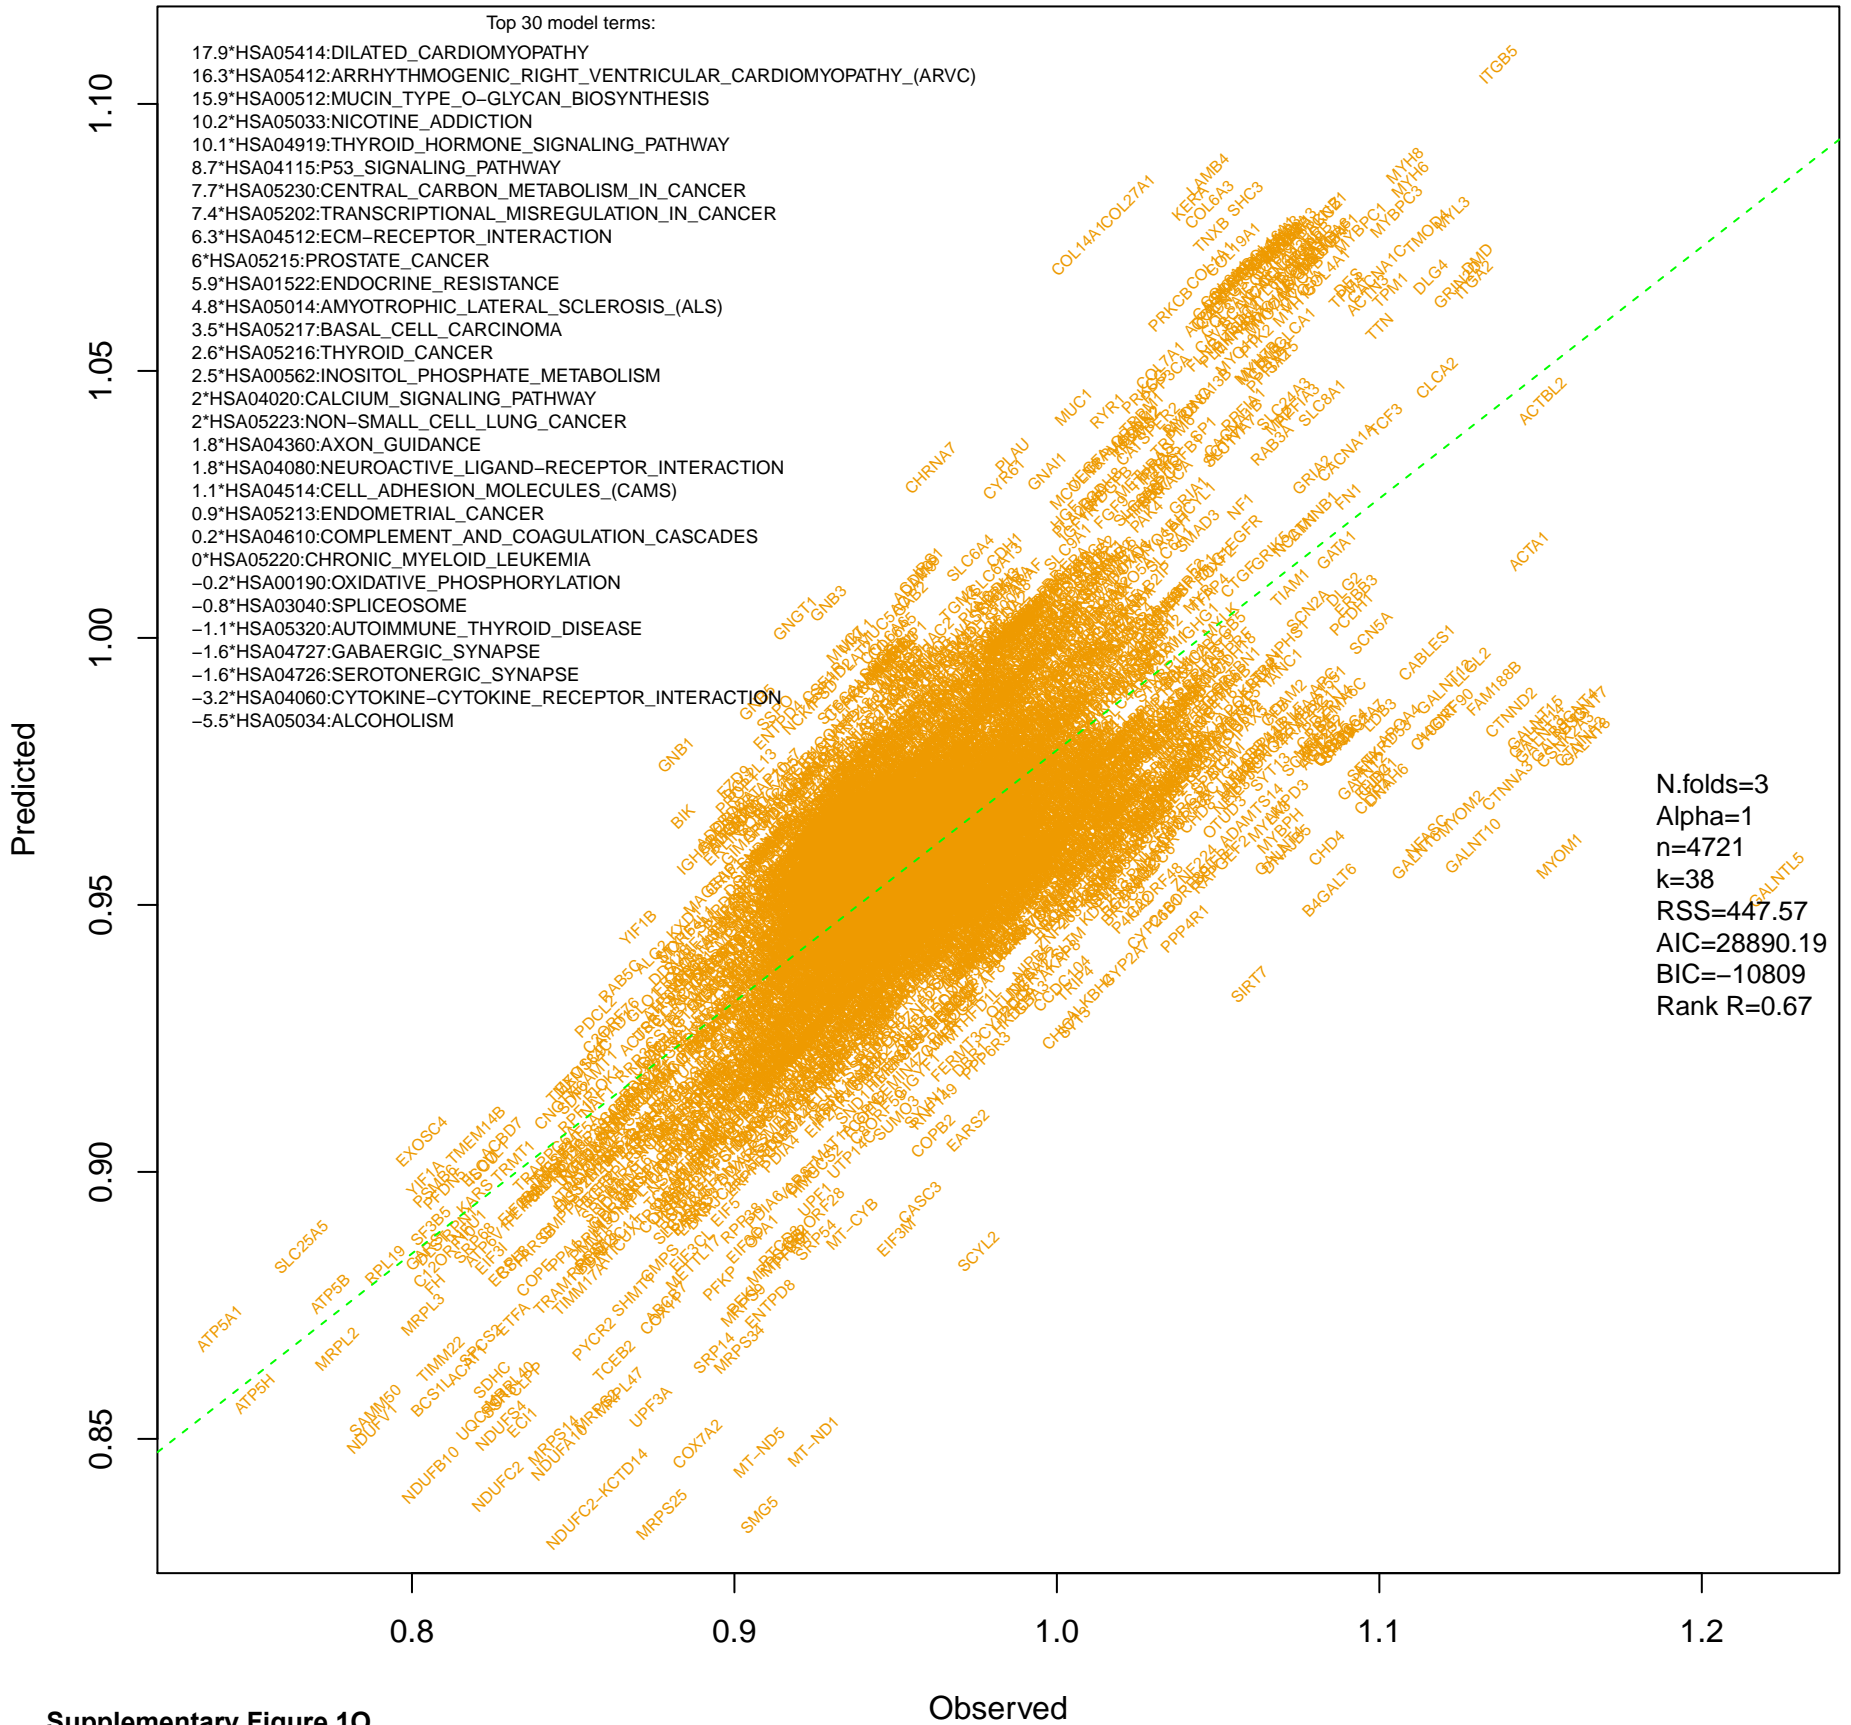

Supplementary Figure 10

TCGA:PRAD

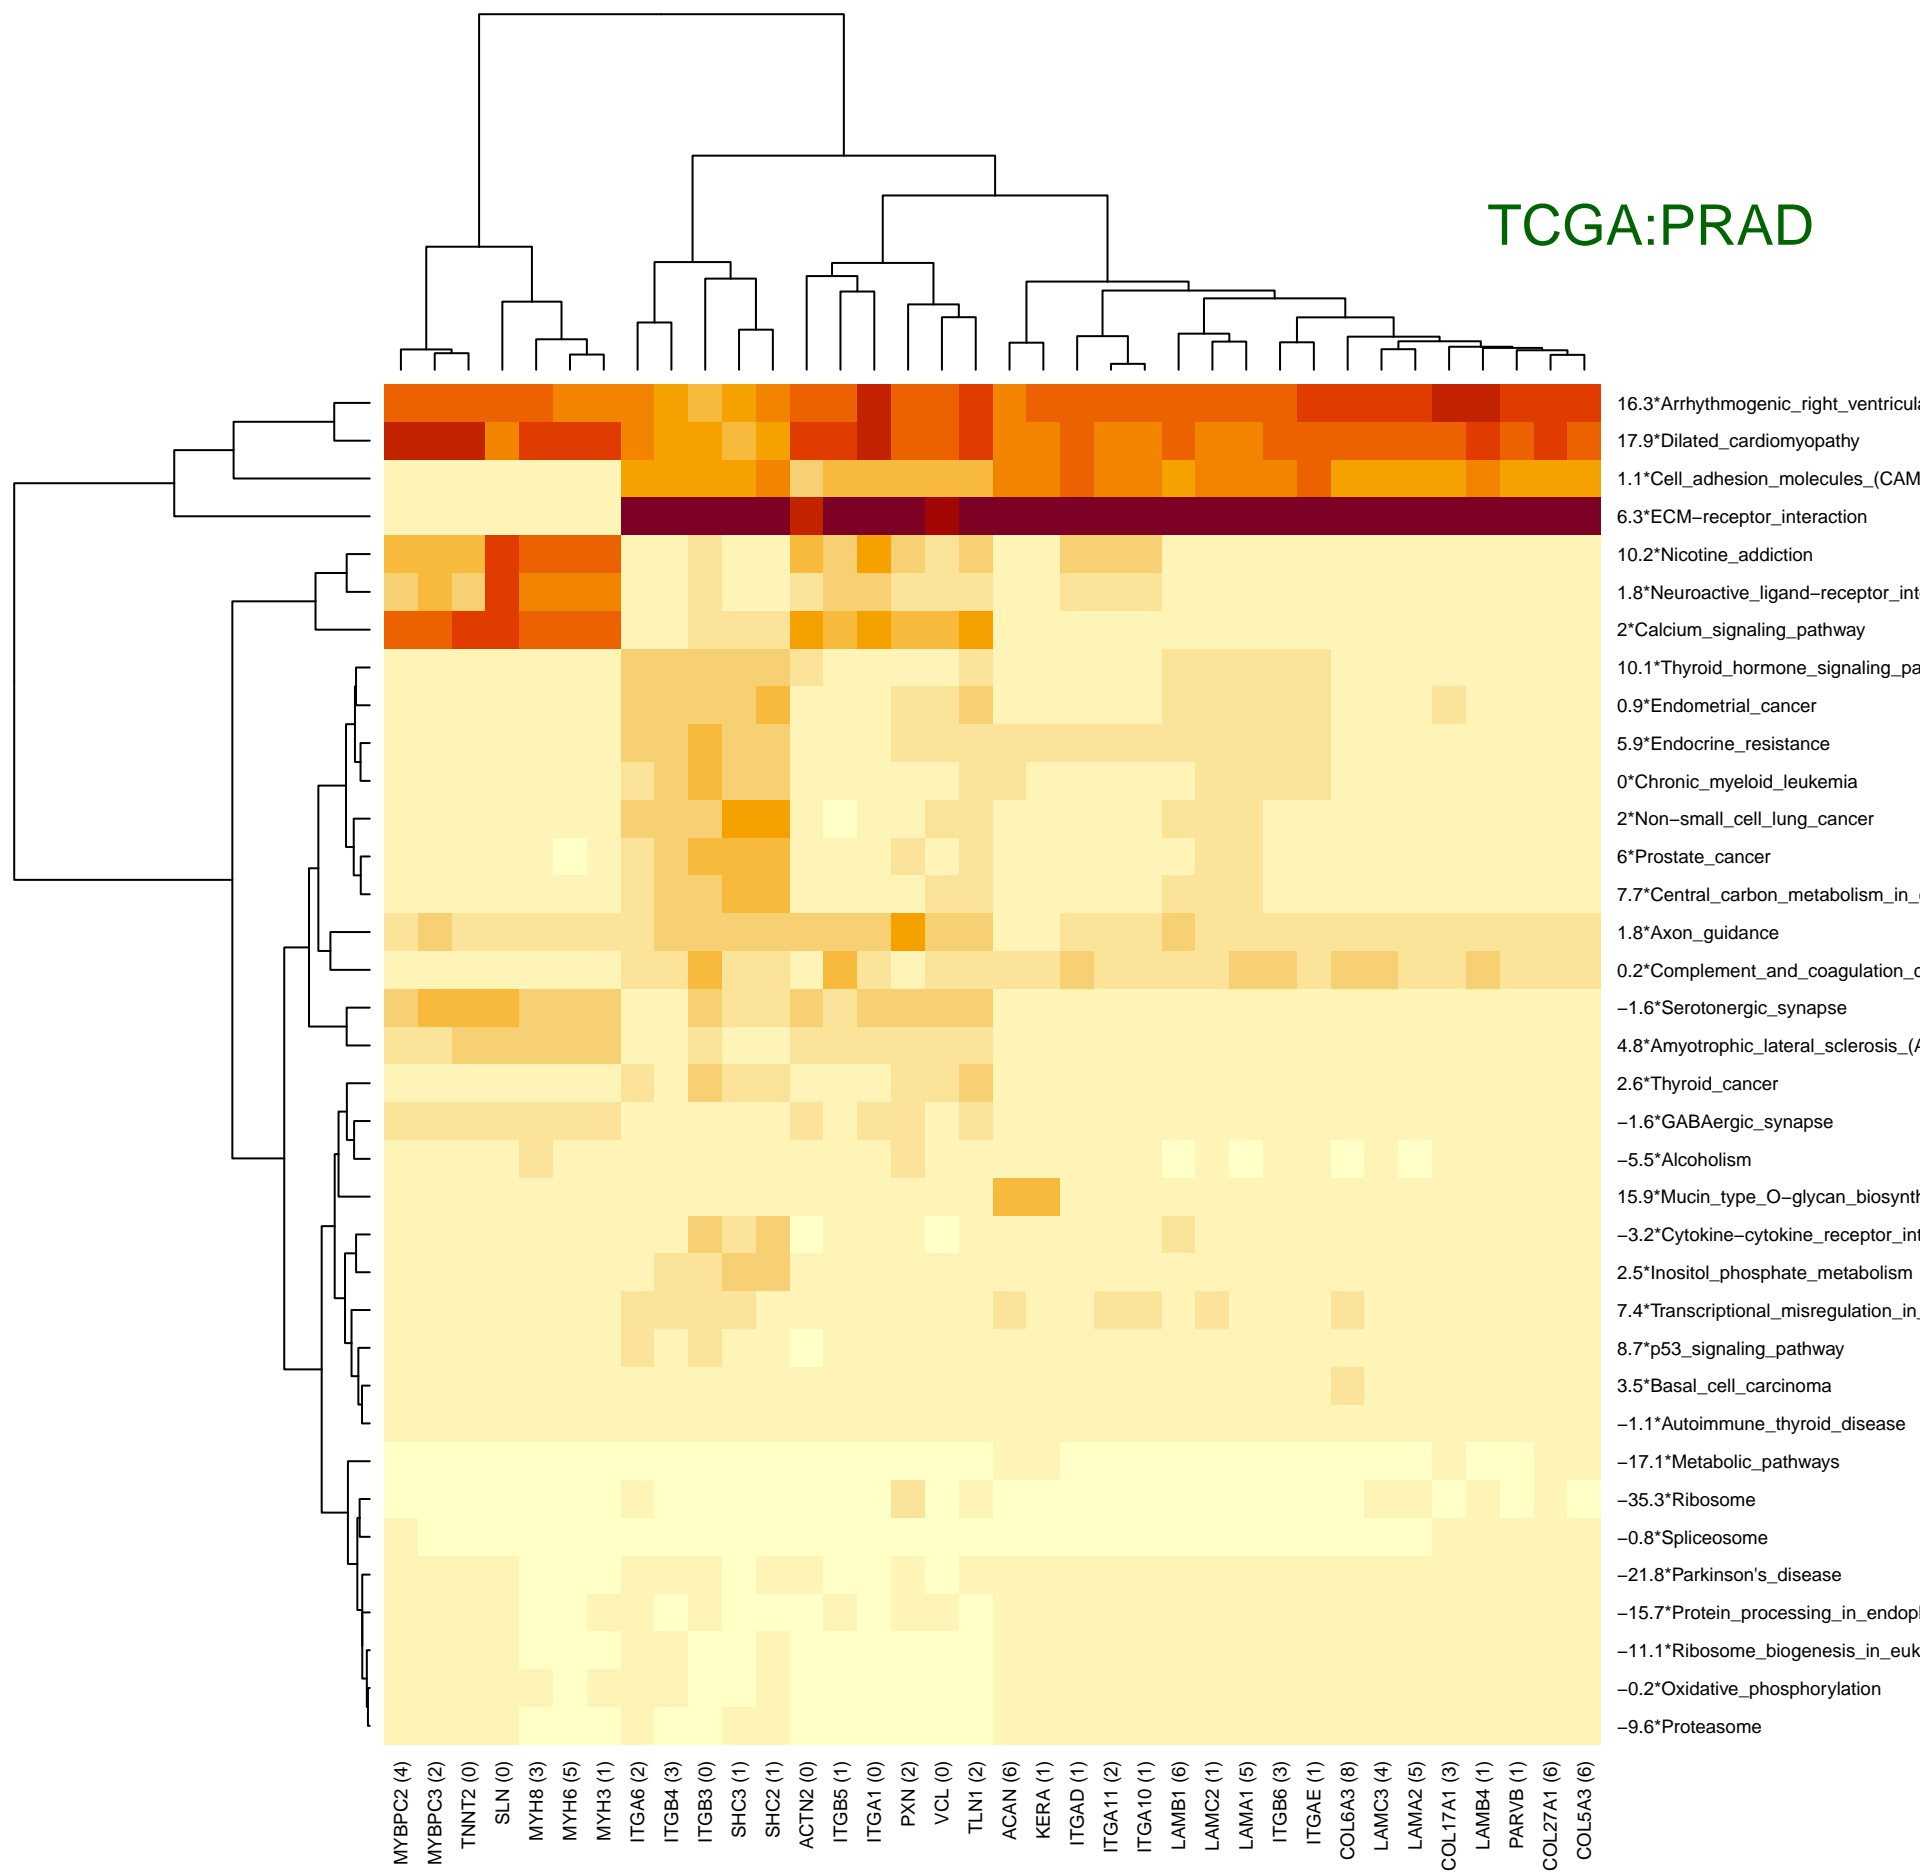

Supplementary Figure 1P

TCGA:SKCM, test set

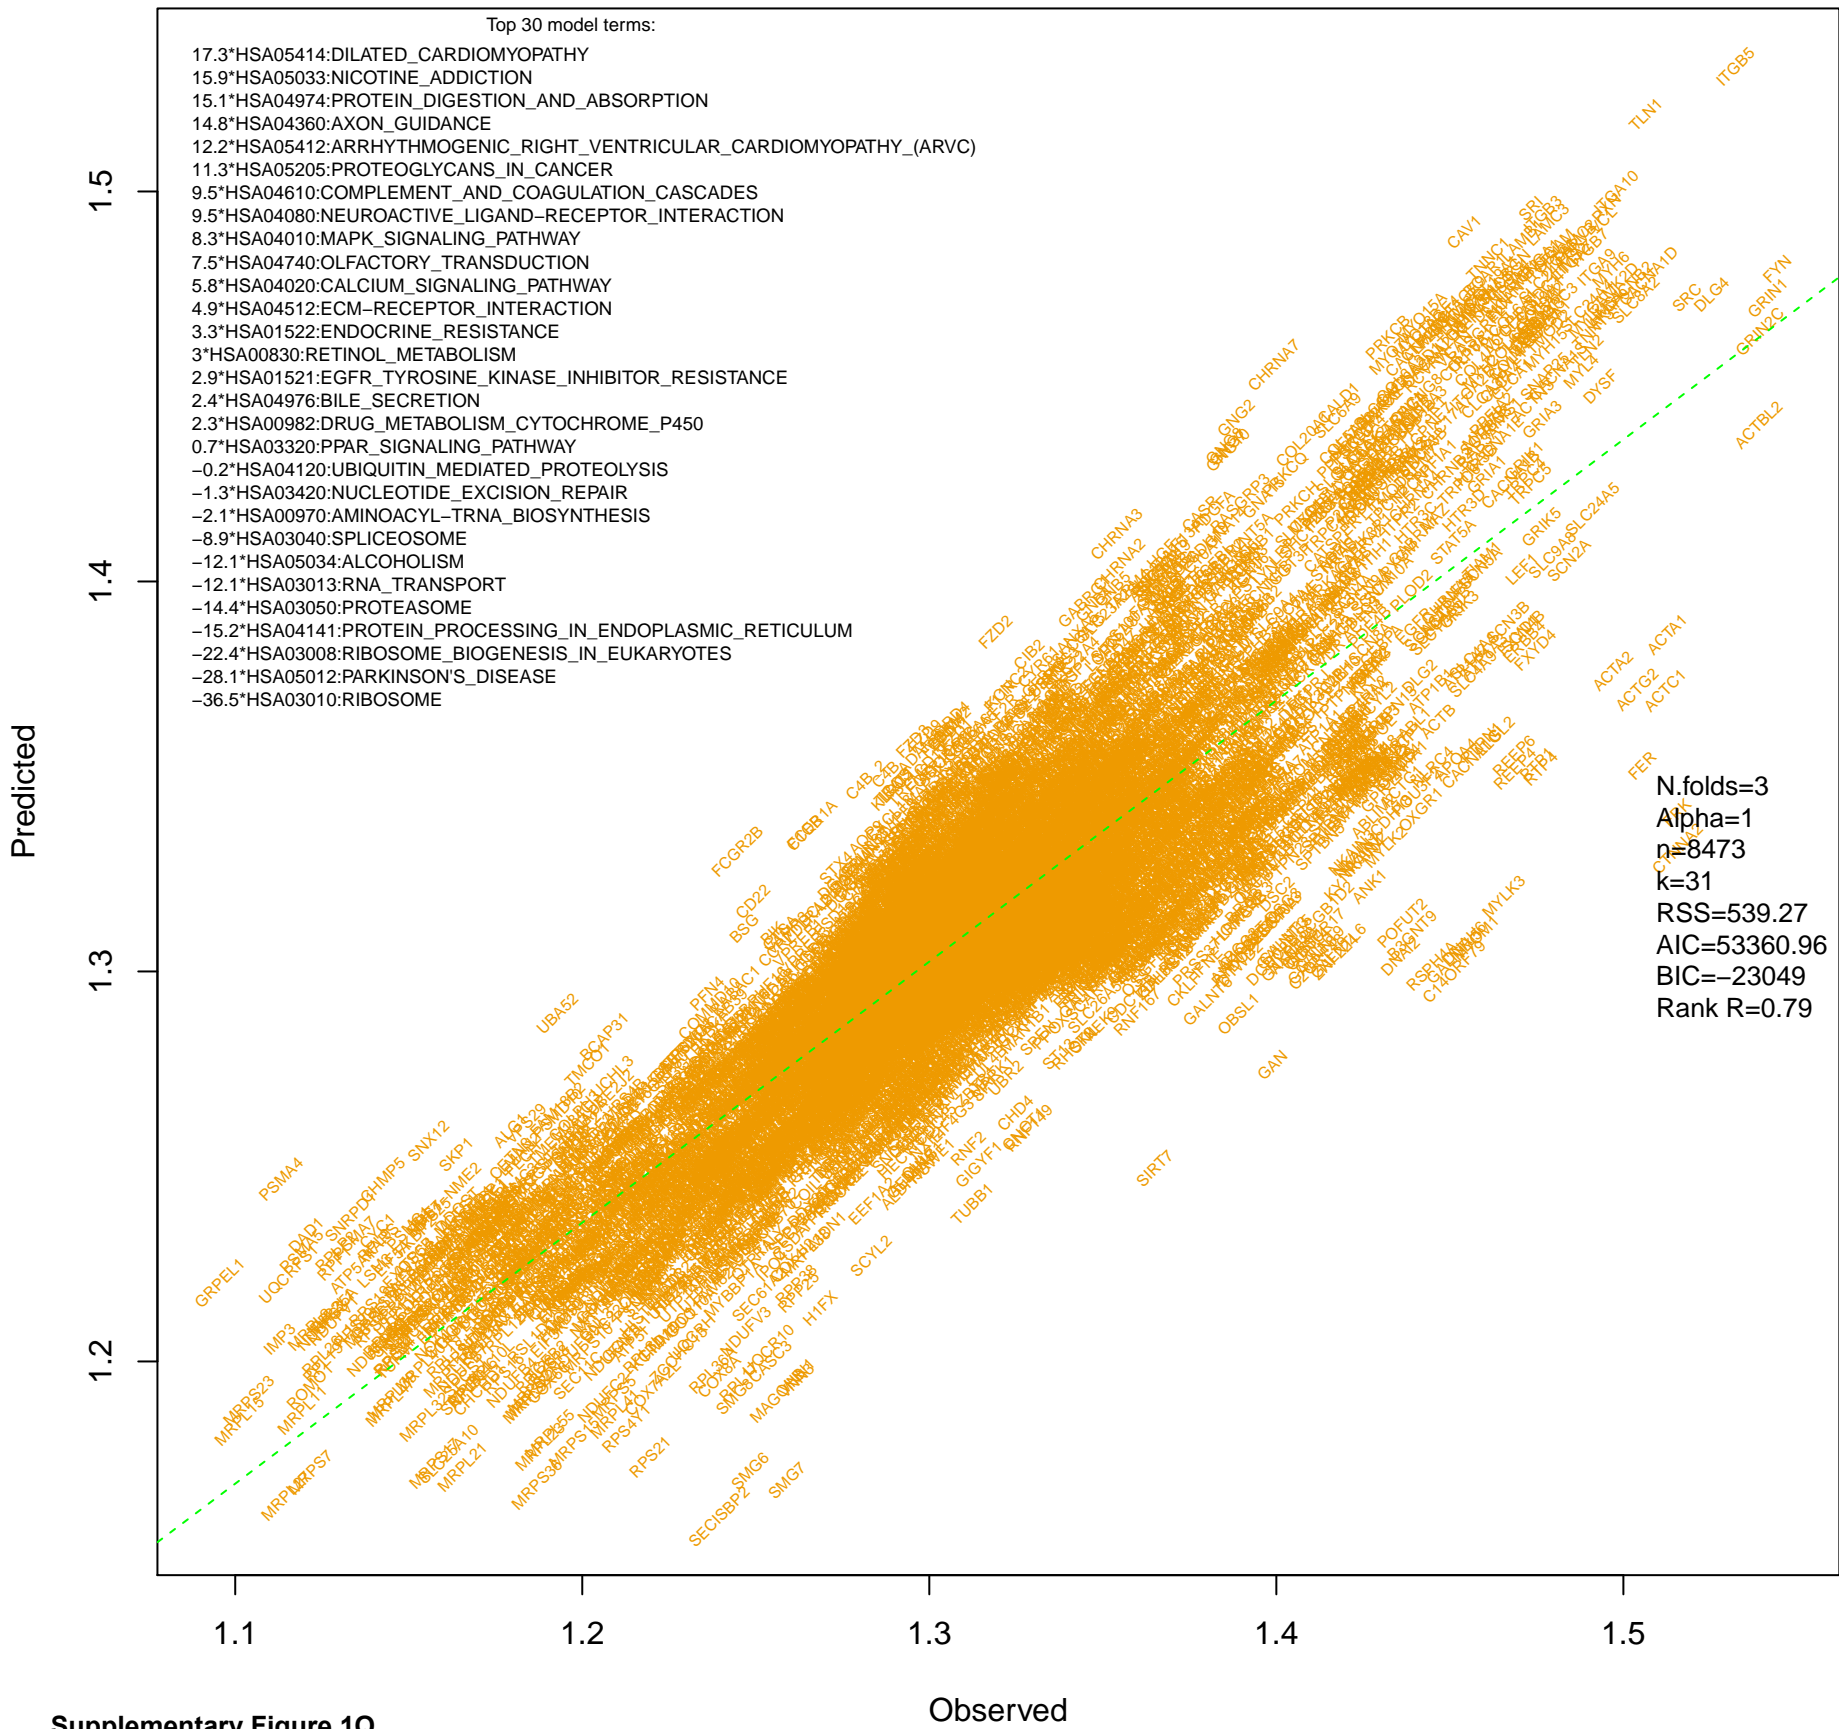

# TCGA:SKCM

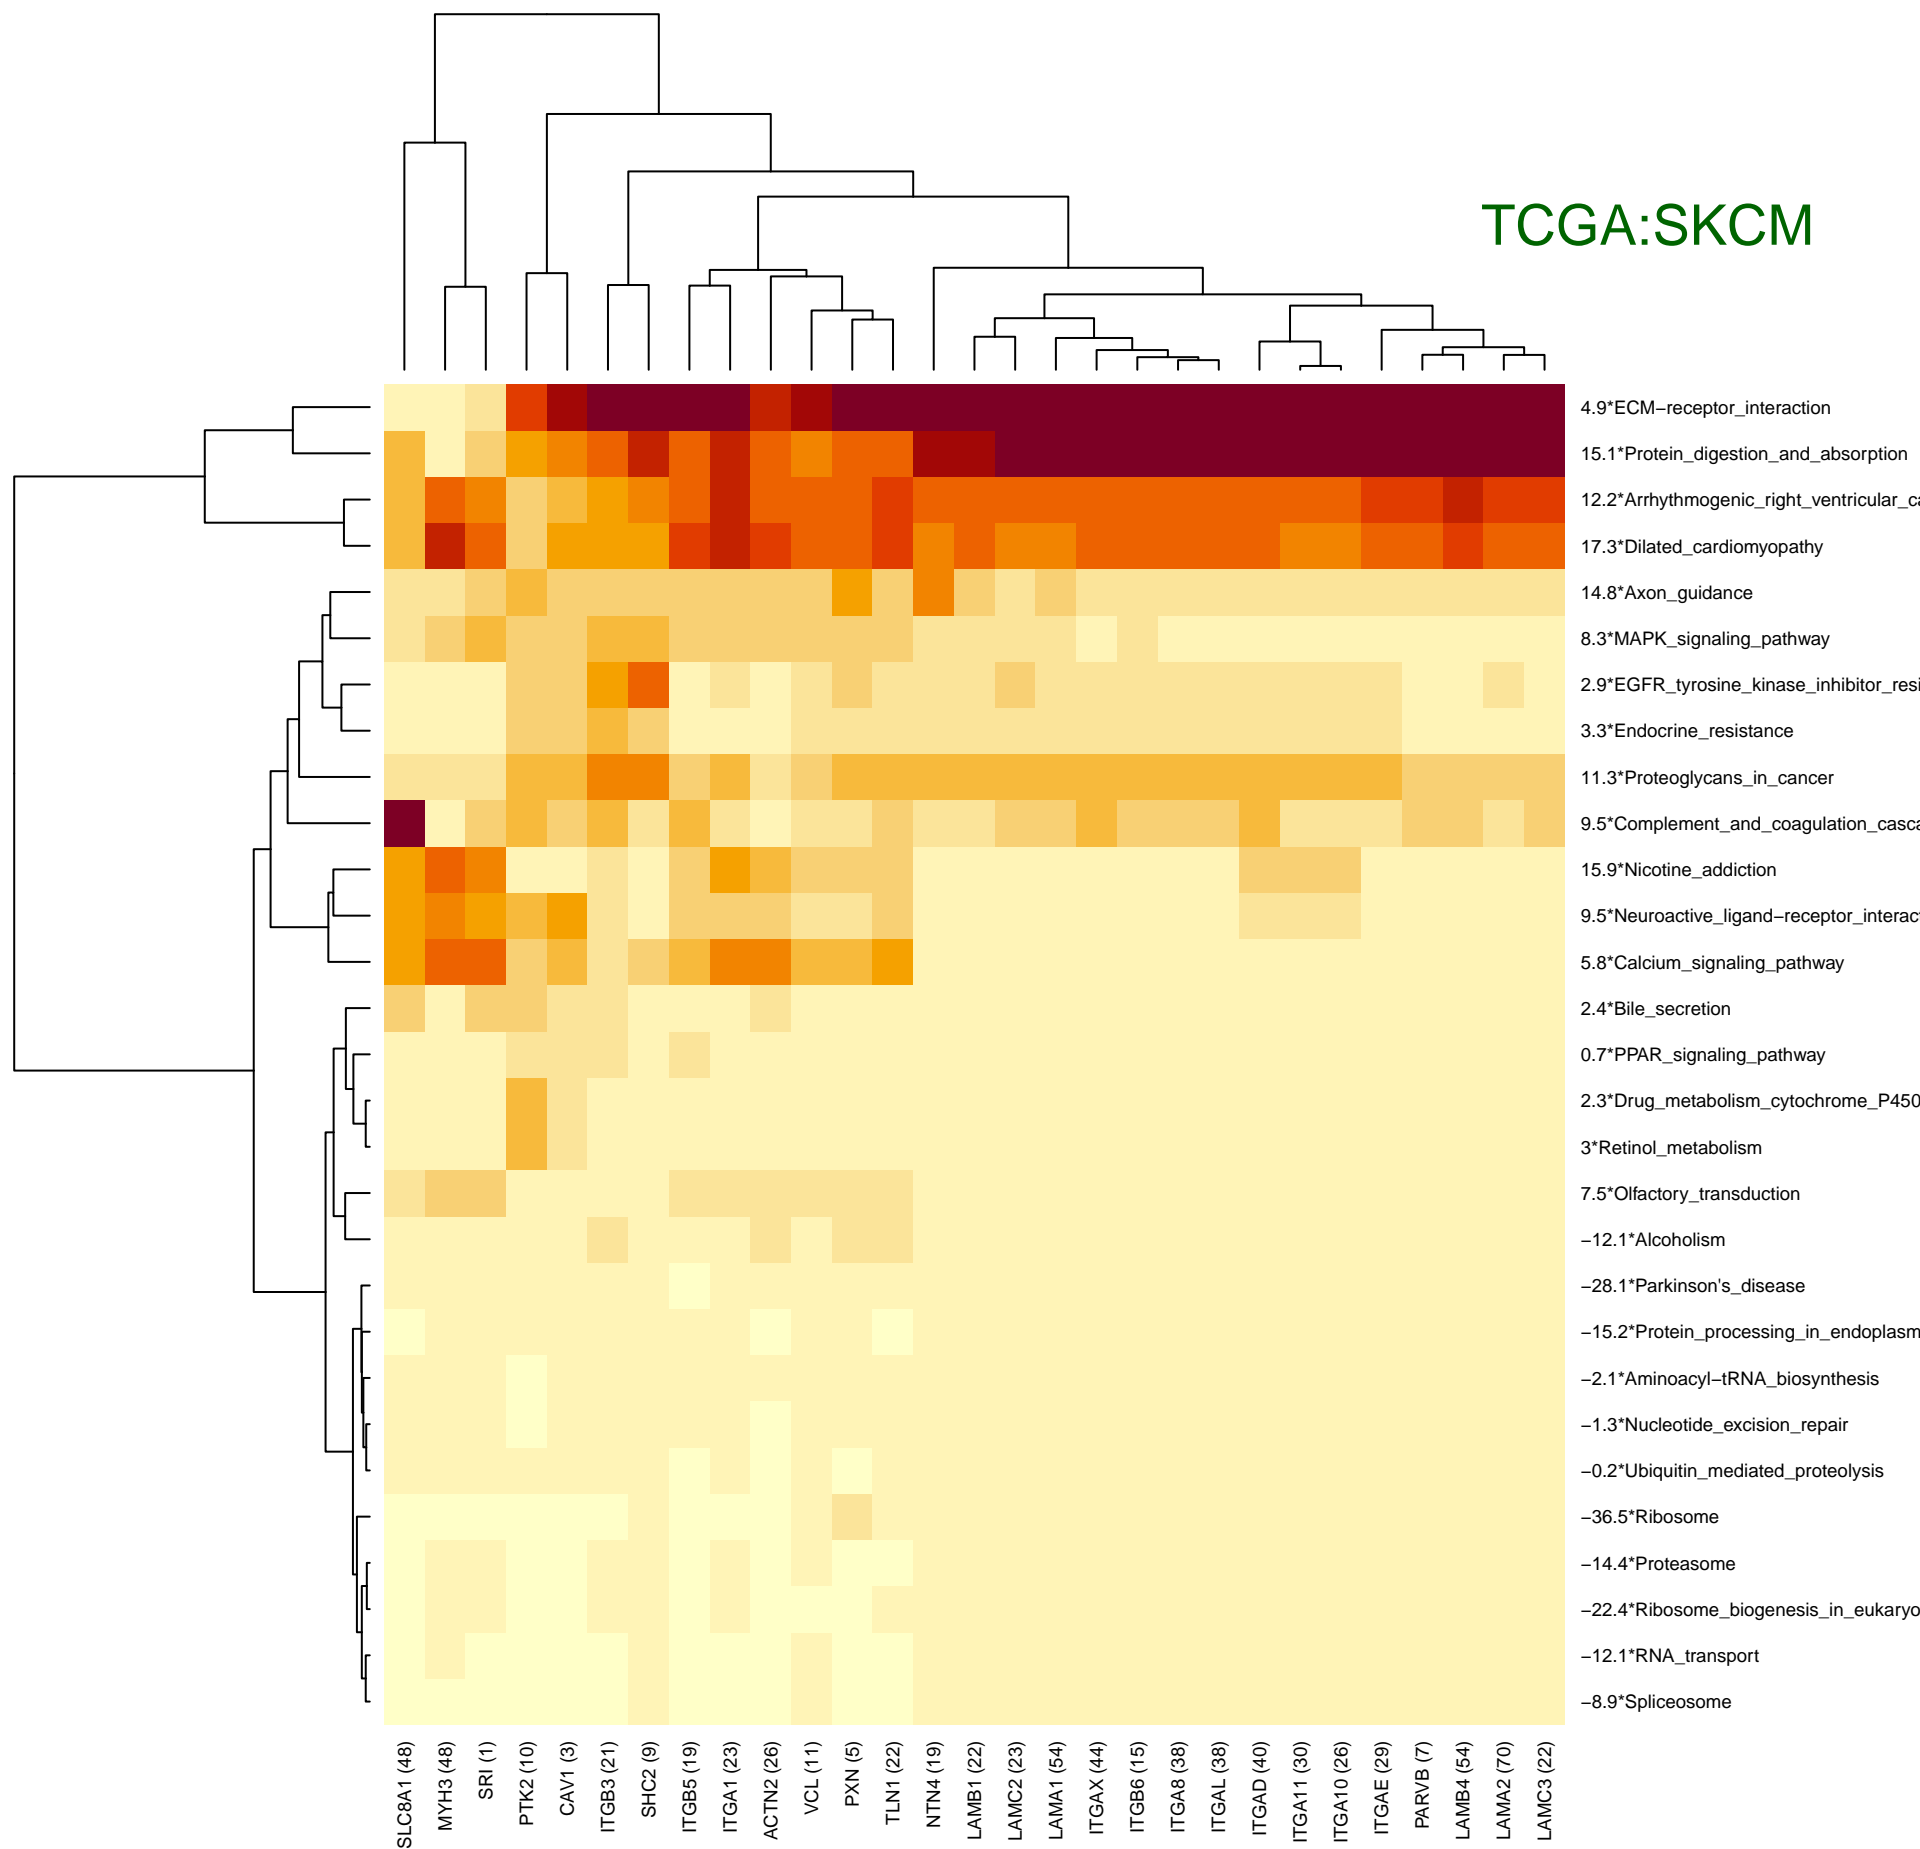

Supplementary Figure 1R



MB(union), test set

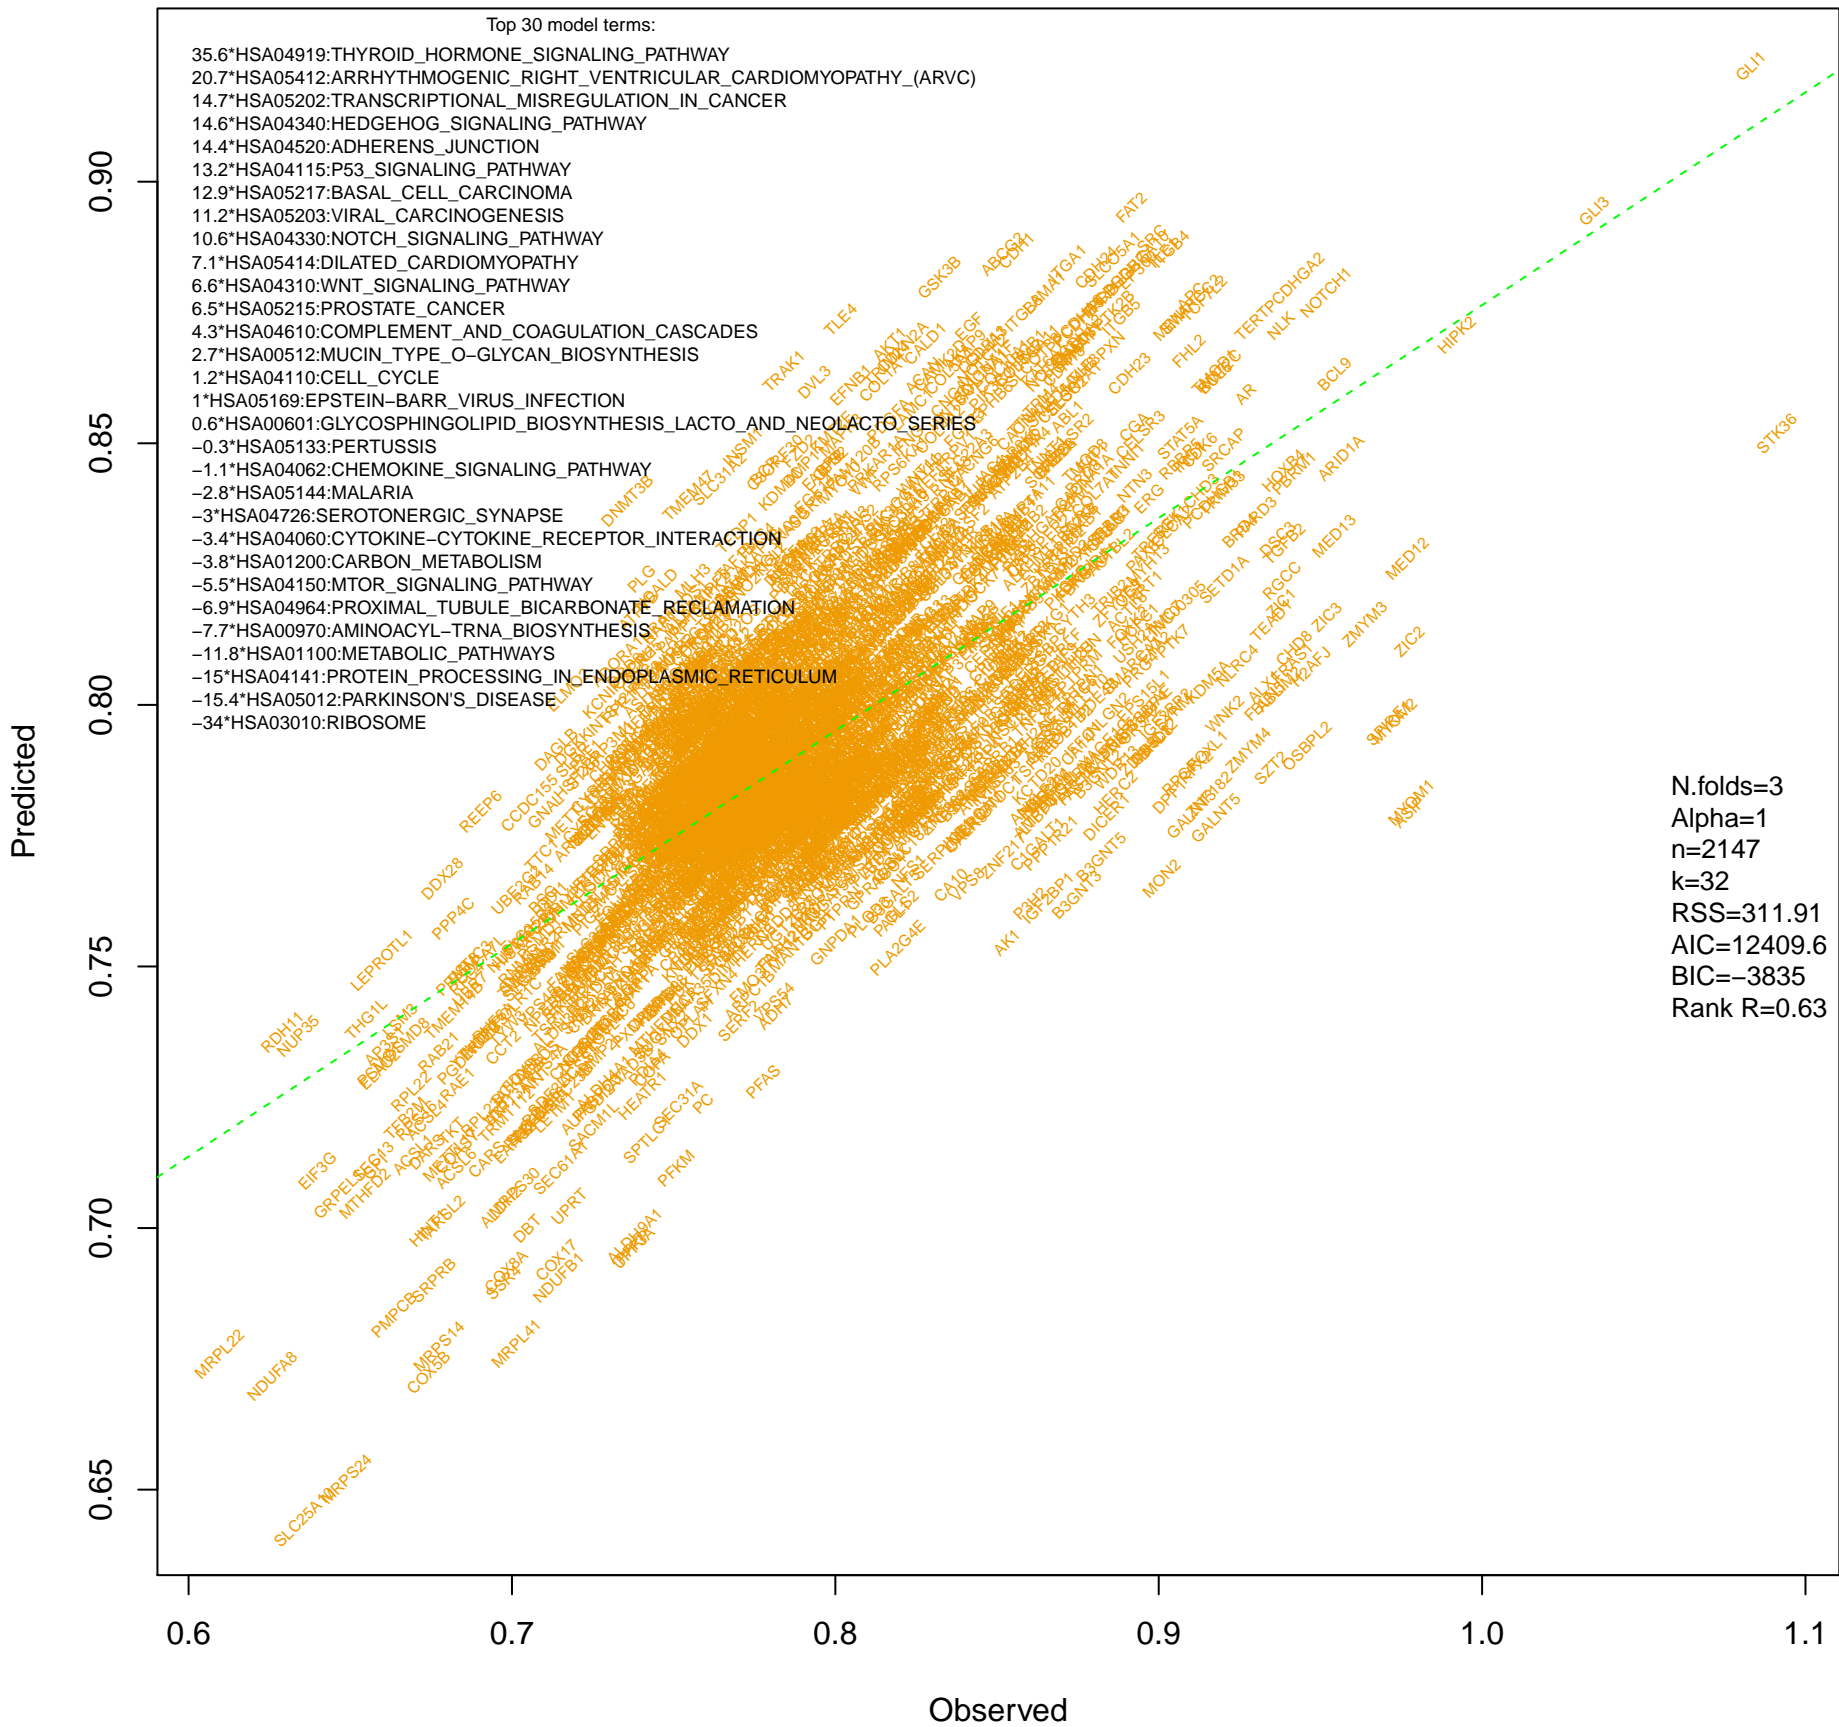

Supplementary Figure 1S

MB(union)

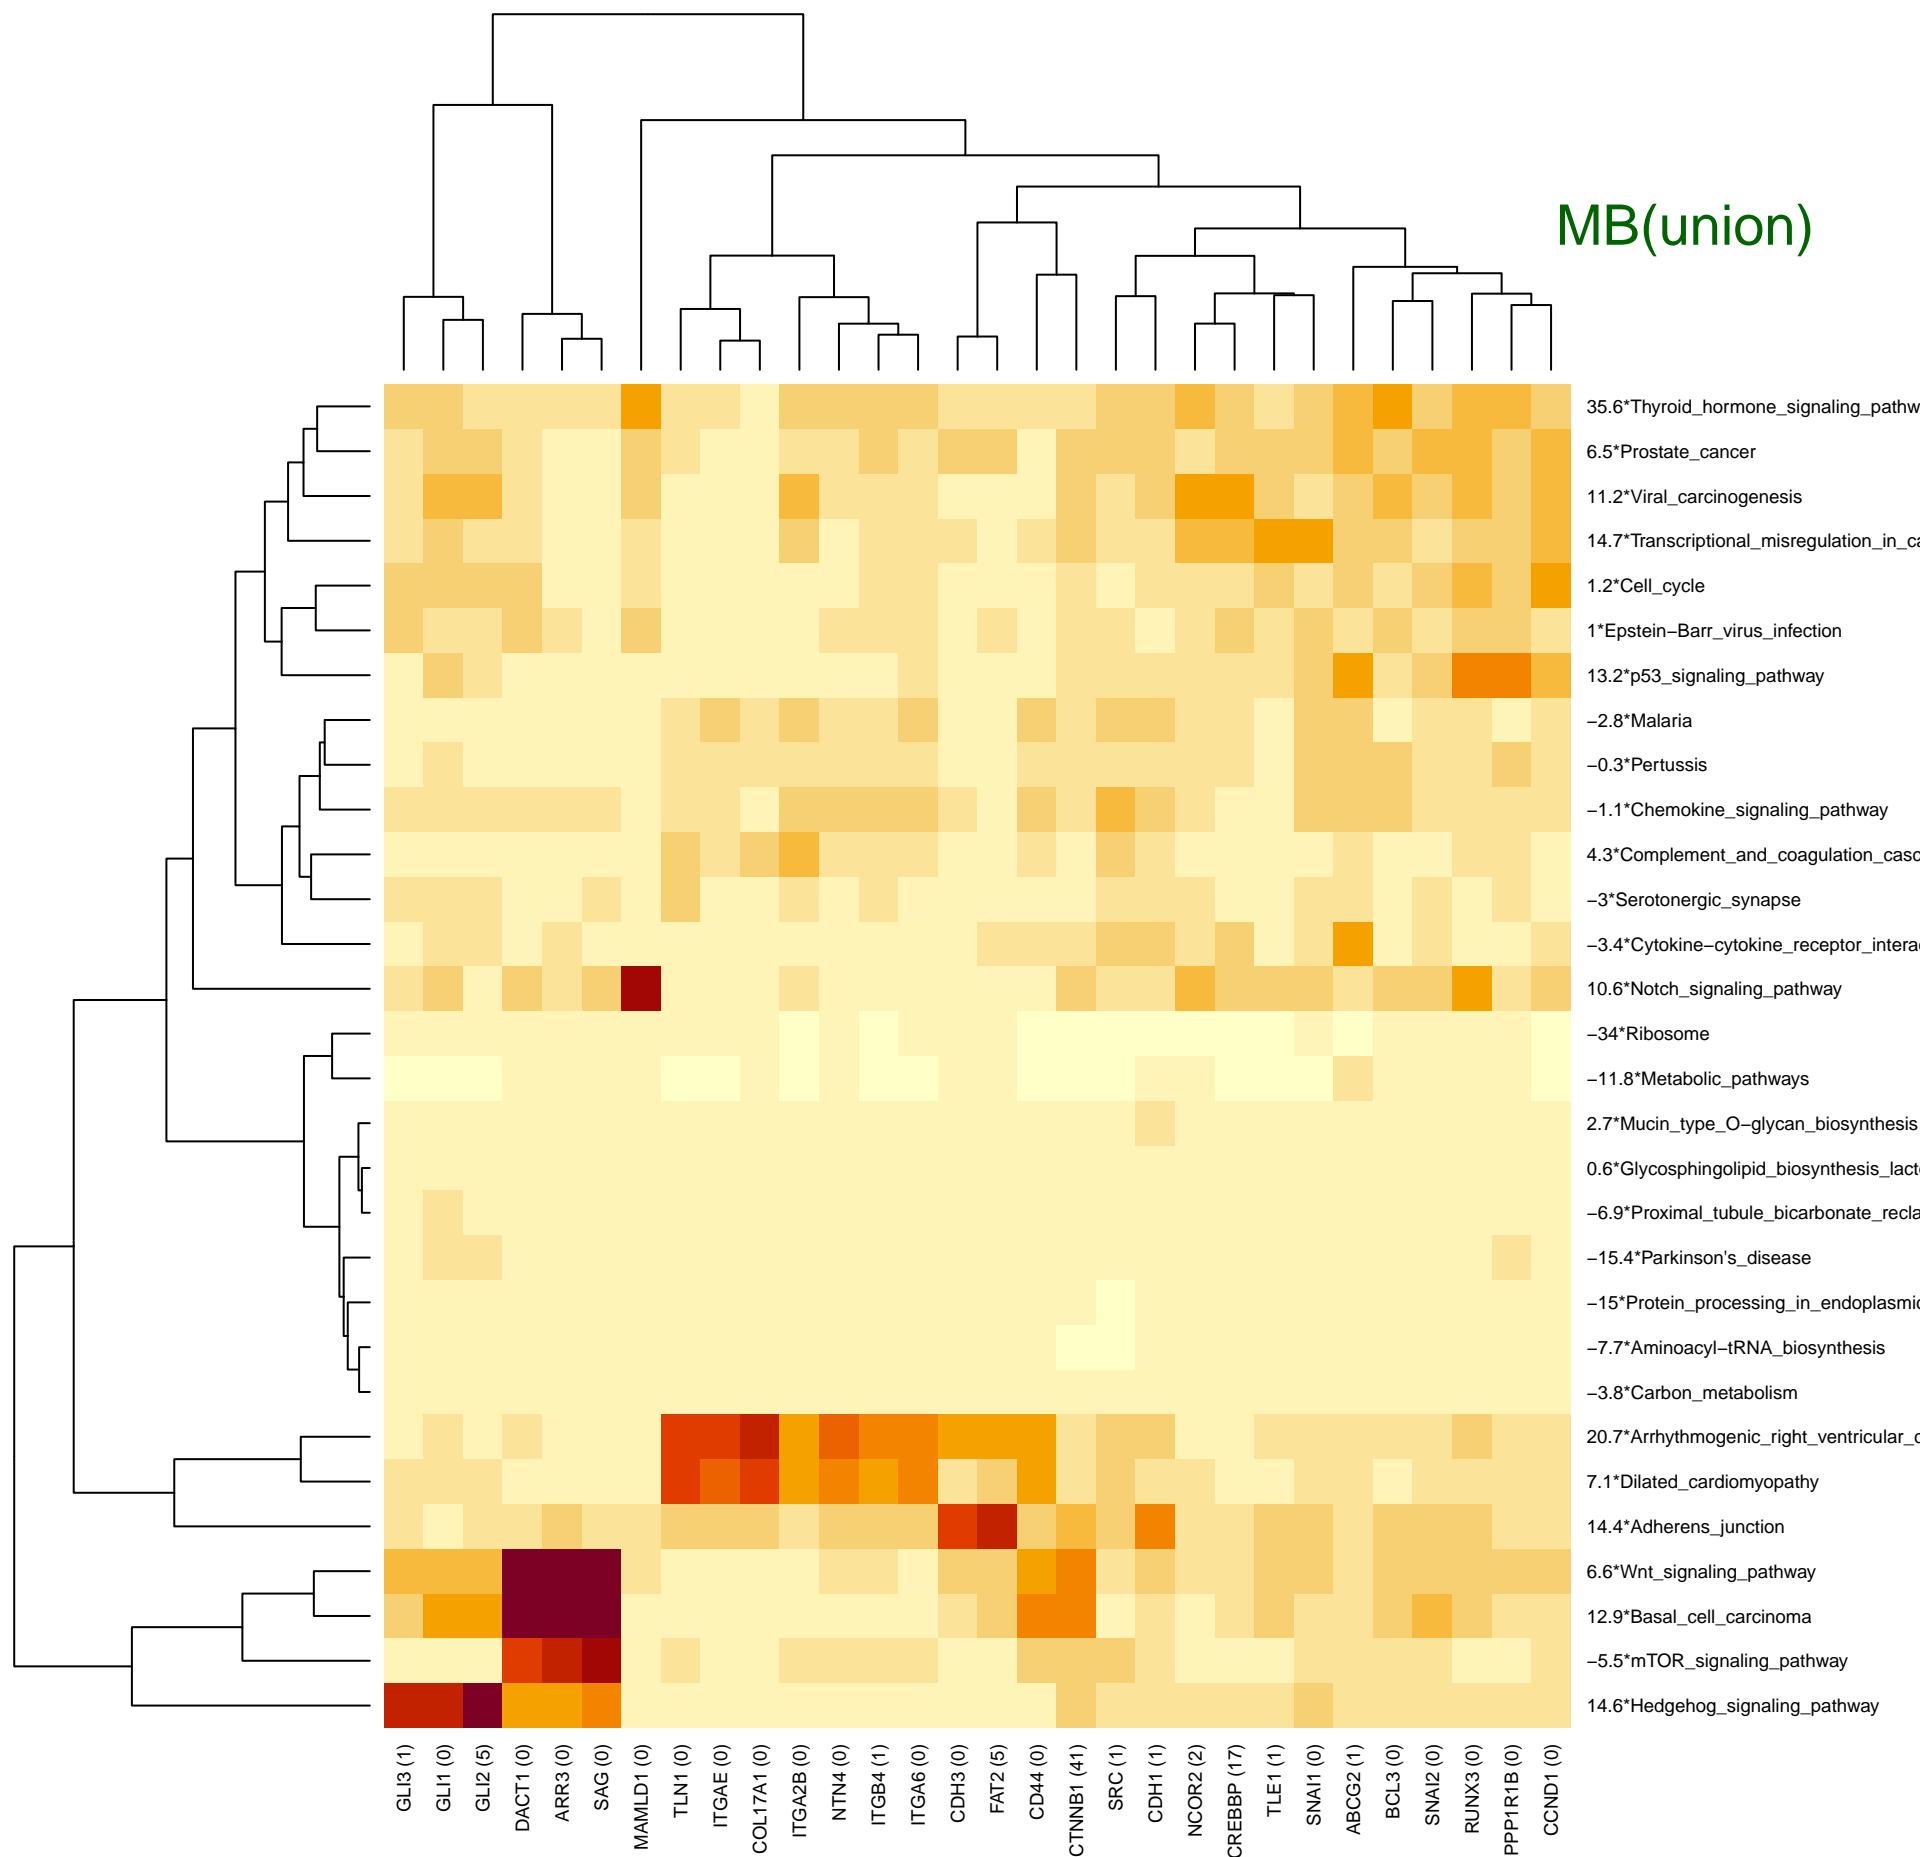

Supplementary Figure 1T
