# Supplementary material for: Individualized discovery of rare cancer drivers in global network context
Source: eLife. 2022 May 20;11:e74010. doi: 10.7554/eLife.74010 (PMC9159755; doi:10.7554/eLife.74010)
Supplement: Supplementary file 5. — The five pages present relations between MutSet&PathReg q (Y axis) and no. of mutations per cohort, gene length, and normalized mutation frequency, replication rate, and gene expression rates, respectively (X axis). Top left legend: Spearman rank R and Kendall tau represent overall correlations between X and Y coordinates regardless of other factors. Bottom left legend: terms’ significance in 4-way linear models. Colored points: genes suggested as potential artifacts in literature; those receiving q<0.05 are text-labeled. [file elife-74010-supp5.zip]

Archive with 6 entries (6 files):
- SupplementaryFigure5.pdf
- SupplementaryFigure5-1.jpg
- SupplementaryFigure5-2.jpg
- SupplementaryFigure5-3.jpg
- SupplementaryFigure5-4.jpg
- SupplementaryFigure5-5.jpg
